# Supplementary material for: Integrated analysis and the identification of a circRNA-miRNA-mRNA network in the progression of abdominal aortic aneurysm
Source: PeerJ. 2021 Dec 24;9:e12682. doi: 10.7717/peerj.12682 (PMC8711282; doi:10.7717/peerj.12682)
Supplement: Supplemental Information 8 [file peerj-09-12682-s008.xlsx]

## Sheet: Sheet1
ID	logFC	AveExpr	t	P.Value	adj.P.Val	B
ADRA1B	1.80472	3.44743	18.2369	2.31157e-36	6.58867e-32	71.5955
BTC	1.40876	3.29403	17.3838	1.50735e-34	2.1482e-30	67.5581
FOSB	-4.99003	8.57711	-17.021	9.16083e-34	8.70371e-30	65.8112
HBA2	-4.2536	9.73681	-15.1496	1.29924e-29	9.25806e-26	56.531
RIMS3	2.25973	4.00421	15.0257	2.48223e-29	1.41502e-25	55.9011
RYR2	1.64608	3.44773	14.9332	4.02913e-29	1.91404e-25	55.4297
SERGEF	1.52522	4.67341	13.9038	9.38155e-27	3.82003e-23	50.1195
HBB	-4.26744	9.65862	-13.7047	2.72482e-26	9.70821e-23	49.0795
FGFRL1	1.35647	4.30799	13.4668	9.79023e-26	3.10057e-22	47.8315
TBXA2R	0.980658	3.3631	13.407	1.35123e-25	3.85141e-22	47.517
MPPED2	0.784695	3.05128	13.2945	2.47893e-25	6.42336e-22	46.9247
ZBED3	1.15508	3.37838	13.1876	4.41741e-25	1.04925e-21	46.3607
LOC653158	-1.62511	5.19706	-12.4023	3.16054e-23	6.9296e-20	42.1888
ANKS1B	0.814792	3.40434	12.328	4.74259e-23	9.65558e-20	41.7921
KLHL30	1.77986	3.46456	12.2883	5.89314e-23	1.11981e-19	41.5798
LOC402560	1.05785	3.77962	12.2208	8.52623e-23	1.5189e-19	41.2187
SLC2A3	-3.25695	7.88289	-12.0685	1.96478e-22	3.29424e-19	40.4025
FOXD2	1.02908	3.71108	12.0416	2.27662e-22	3.60503e-19	40.2585
ETNK2	0.492688	3.22837	11.902	4.89825e-22	7.34815e-19	39.5092
CHMP4C	0.982971	3.21984	11.8393	6.91122e-22	9.84953e-19	39.1725
BTG2	-2.69639	6.53922	-11.8223	7.58716e-22	1.02979e-18	39.0812
ENDOG	0.982838	3.65454	11.7967	8.7316e-22	1.13126e-18	38.9438
ITGA10	1.98647	4.66264	11.7555	1.09496e-21	1.35694e-18	38.7224
LOC643438	0.598176	3.4148	11.7227	1.31129e-21	1.55732e-18	38.5461
NR2F6	2.11616	4.52921	11.7057	1.44001e-21	1.64179e-18	38.4545
MPST	1.33153	3.83844	11.6008	2.56412e-21	2.81097e-18	37.8901
PACSIN3	1.06398	3.59929	11.5358	3.66705e-21	3.87118e-18	37.5401
PPP1R12B	1.63365	3.74161	11.4543	5.74276e-21	5.84593e-18	37.1012
OBFC2B	1.77504	4.16272	11.4212	6.8924e-21	6.77428e-18	36.9227
HS.546148	1.78525	3.58667	11.4121	7.24823e-21	6.88654e-18	36.8735
NPNT	1.39941	3.74949	11.3419	1.06662e-20	9.80705e-18	36.4955
HES6	1.43532	3.68671	11.2994	1.34816e-20	1.16712e-17	36.2663
CYTL1	2.12673	4.08339	11.299	1.35126e-20	1.16712e-17	36.264
ARVCF	0.740978	3.13433	11.286	1.45171e-20	1.217e-17	36.1938
SIK1	-3.01727	5.89966	-11.2689	1.5948e-20	1.29876e-17	36.1019
ATP1A2	2.51774	3.93265	11.2146	2.15184e-20	1.70372e-17	35.8087
C1ORF151	0.739177	3.44428	11.2049	2.2702e-20	1.74885e-17	35.7563
STAC2	0.603622	3.04008	11.1982	2.35498e-20	1.76642e-17	35.7204
CNTN4	0.891647	3.25849	11.1917	2.44075e-20	1.78381e-17	35.6854
THY1	-2.21445	6.7684	-11.1823	2.57112e-20	1.83211e-17	35.6345
LOC644646	1.13677	3.33471	11.0949	4.16255e-20	2.89378e-17	35.163
ARHGAP4	-1.79529	5.54868	-11.0662	4.87688e-20	3.30966e-17	35.008
ALDH1L1	0.916701	3.37679	10.9671	8.42738e-20	5.58618e-17	34.4727
FOS	-3.52942	8.18614	-10.9202	1.09117e-19	7.01502e-17	34.2199
CARTPT	1.04285	3.14534	10.9175	1.10752e-19	7.01502e-17	34.2053
NR4A2	-2.69826	6.21831	-10.8943	1.25859e-19	7.79864e-17	34.0802
PPP1R12C	1.39715	4.37899	10.8629	1.49674e-19	9.07694e-17	33.9106
LOC152195	0.602609	3.06779	10.7651	2.56786e-19	1.52482e-16	33.3822
NSUN7	0.93829	3.3346	10.7107	3.46635e-19	2.01635e-16	33.0886
PCDHB12	0.761226	3.18646	10.6747	4.22948e-19	2.41106e-16	32.8938
FLJ35220	0.693902	3.23558	10.6639	4.48929e-19	2.50898e-16	32.8355
MYO1D	2.58597	5.54648	10.6445	4.99563e-19	2.73828e-16	32.7309
KIAA1539	1.74701	4.67309	10.6251	5.55906e-19	2.98962e-16	32.6262
GEMIN8	0.892469	3.51705	10.6079	6.11306e-19	3.2126e-16	32.5333
TC2N	2.3495	3.95105	10.6054	6.1991e-19	3.2126e-16	32.5196
WAS	-2.20511	6.23362	-10.5852	6.92757e-19	3.46549e-16	32.4108
ATP13A1	-1.59246	5.12121	-10.5851	6.93025e-19	3.46549e-16	32.4104
KCTD7	0.626973	3.28605	10.5657	7.71627e-19	3.7885e-16	32.3053
C1ORF190	0.983383	3.42298	10.5627	7.84203e-19	3.7885e-16	32.2895
PXMP2	0.878807	3.84744	10.5589	8.0115e-19	3.80586e-16	32.2685
POP5	1.03242	3.95917	10.4994	1.11215e-18	5.19665e-16	31.9475
NTRK3	1.58789	3.48045	10.49	1.17162e-18	5.38622e-16	31.8965
RRAGC	1.99972	5.01984	10.4781	1.25095e-18	5.65966e-16	31.8323
STOML1	1.05855	3.61405	10.4509	1.45318e-18	6.41554e-16	31.6856
FAM116B	-1.12862	4.47549	-10.4497	1.46304e-18	6.41554e-16	31.679
TOLLIP	1.30893	3.88385	10.4425	1.52228e-18	6.49557e-16	31.6402
ZFPL1	0.884756	3.64478	10.4404	1.53991e-18	6.49557e-16	31.6289
TRMU	1.08638	3.49774	10.4392	1.54966e-18	6.49557e-16	31.6227
BHLHB2	-2.69073	7.5833	-10.4324	1.60953e-18	6.64875e-16	31.5856
C3ORF54	1.48783	4.0483	10.4262	1.66531e-18	6.78092e-16	31.5523
PRRX2	1.452	4.98609	10.3926	2.00459e-18	8.04744e-16	31.3707
MRPL23	2.14945	5.2227	10.3714	2.25281e-18	8.91832e-16	31.2565
HMCN1	1.35059	3.22342	10.3665	2.31492e-18	9.03866e-16	31.2298
STAC	1.33104	3.22789	10.3496	2.53989e-18	9.78304e-16	31.1391
HS.177532	1.18166	3.45787	10.3332	2.78092e-18	1.05686e-15	31.0503
AK3L1	2.05736	4.36836	10.3261	2.89124e-18	1.07257e-15	31.0122
USP13	1.44487	3.83075	10.3257	2.89753e-18	1.07257e-15	31.0101
KBTBD12	1.02501	2.94916	10.3207	2.97955e-18	1.0888e-15	30.9828
DLG5	0.654887	3.46809	10.3164	3.05009e-18	1.10047e-15	30.9599
ZFP14	0.739923	3.34791	10.2971	3.39241e-18	1.20867e-15	30.8557
KIAA0527	0.748071	3.13556	10.2947	3.43837e-18	1.20992e-15	30.8426
NKD1	1.22336	3.12548	10.2889	3.54923e-18	1.2337e-15	30.8115
EXOSC4	0.832256	3.51473	10.2662	4.02212e-18	1.38124e-15	30.6891
C16ORF30	1.90261	4.70698	10.2196	5.20075e-18	1.76473e-15	30.4375
MDP1	1.5899	4.25106	10.1927	6.03034e-18	2.02215e-15	30.2926
MARK1	1.37094	3.59603	10.1905	6.10641e-18	2.02385e-15	30.2803
C9ORF7	0.521577	3.58567	10.185	6.29178e-18	2.06132e-15	30.2511
FAM114A1	1.27052	3.31628	10.1788	6.51322e-18	2.10962e-15	30.2172
PTGIR	1.63183	3.5379	10.1416	7.99168e-18	2.5594e-15	30.0169
WASF3	1.11539	4.06104	10.1393	8.09664e-18	2.5642e-15	30.0042
PIB5PA	0.475625	3.02335	10.0892	1.0669e-17	3.34173e-15	29.7341
PARVA	1.55649	4.04221	10.0672	1.20413e-17	3.73059e-15	29.6156
ADAM19	-1.64951	5.35199	-10.0474	1.34238e-17	4.11418e-15	29.5092
PRKAB1	1.35432	4.33553	10.0424	1.37992e-17	4.14623e-15	29.4822
TBC1D3B	-0.682687	3.68322	-10.0392	1.40465e-17	4.14623e-15	29.4648
ZC3H12A	-1.75312	4.66624	-10.0384	1.41092e-17	4.14623e-15	29.4605
ASB2	0.410047	3.09094	10.0384	1.41103e-17	4.14623e-15	29.4604
PTPN3	1.55041	3.45087	9.99086	1.83277e-17	5.33055e-15	29.2044
PHYHD1	0.781307	3.2659	9.98295	1.91424e-17	5.51128e-15	29.1618
UQCRB	1.57624	3.91189	9.97661	1.9822e-17	5.64987e-15	29.1277
ECGF1	-2.68377	8.01504	-9.971	2.04432e-17	5.76924e-15	29.0975
PLN	2.3622	4.96148	9.95622	2.21749e-17	6.19659e-15	29.0179
WDR55	1.80769	3.98367	9.94826	2.31679e-17	6.4112e-15	28.975
FLYWCH1	1.54663	3.34025	9.9431	2.3835e-17	6.53238e-15	28.9472
PDK3	1.43737	4.0978	9.93378	2.50876e-17	6.81021e-15	28.8971
IGSF9B	1.51052	3.70307	9.92879	2.57869e-17	6.93399e-15	28.8702
ZNF271	1.28502	4.05167	9.91169	2.83295e-17	7.5465e-15	28.7781
ATP6AP1L	1.03228	3.59518	9.90124	3.00047e-17	7.91874e-15	28.7219
ADSSL1	2.0147	4.29078	9.89849	3.04622e-17	7.96572e-15	28.707
ZNF791	2.0228	4.306	9.88021	3.36832e-17	8.72793e-15	28.6087
PLEKHN1	-0.367468	3.35582	-9.86133	3.73661e-17	9.595e-15	28.5071
MPP7	0.866773	3.06465	9.8587	3.79096e-17	9.64767e-15	28.4929
RGS2	-2.62865	7.56777	-9.84145	4.16807e-17	1.05135e-14	28.4001
PROSAPIP1	0.892335	3.44648	9.83473	4.32479e-17	1.08131e-14	28.364
OSTM1	1.8087	4.00283	9.82902	4.46278e-17	1.10611e-14	28.3332
ZC3H10	1.45401	4.00138	9.81604	4.79258e-17	1.17761e-14	28.2634
CORO6	0.891181	3.49134	9.79208	5.46697e-17	1.33184e-14	28.1346
LRFN3	1.84366	4.79042	9.77758	5.92006e-17	1.43e-14	28.0566
TRDMT1	0.528474	3.1428	9.77285	6.07605e-17	1.45534e-14	28.0312
TTLL12	1.70128	4.14354	9.76218	6.4426e-17	1.53028e-14	27.9738
IRAK1BP1	0.75001	3.36668	9.75667	6.64064e-17	1.56428e-14	27.9442
AIF1L	1.66678	4.0651	9.75346	6.7587e-17	1.57904e-14	27.9269
DUSP5	-2.49078	6.15291	-9.73123	7.63593e-17	1.76949e-14	27.8075
LOC441743	0.86383	3.16315	9.71946	8.14565e-17	1.87238e-14	27.7442
ZNHIT2	0.596964	3.46762	9.71604	8.3003e-17	1.89267e-14	27.7258
MOBKL2A	-1.00645	4.56487	-9.7025	8.9404e-17	2.02245e-14	27.6531
LOC650695	0.687034	2.88921	9.68412	9.88951e-17	2.21953e-14	27.5543
KIAA0232	0.973791	3.3303	9.67637	1.0319e-16	2.29783e-14	27.5127
IL1B	-2.23624	4.90235	-9.67154	1.05961e-16	2.34124e-14	27.4868
JUNB	-2.18914	5.60659	-9.66503	1.09812e-16	2.40177e-14	27.4518
TNFAIP3	-2.21396	5.38187	-9.66408	1.10386e-16	2.40177e-14	27.4467
IGSF1	1.35778	3.15234	9.65329	1.17121e-16	2.52444e-14	27.3888
REC8	-1.11336	4.4009	-9.65224	1.17795e-16	2.52444e-14	27.3831
PARL	1.41094	5.98563	9.64441	1.22964e-16	2.61555e-14	27.3411
TMEM159	1.17383	4.19588	9.62557	1.36349e-16	2.87878e-14	27.24
ADRA2C	1.31024	3.20422	9.61208	1.46817e-16	3.077e-14	27.1676
ZNF704	0.503434	2.97554	9.60354	1.53854e-16	3.20096e-14	27.1217
IMAA	-3.30936	10.3636	-9.58241	1.72757e-16	3.55209e-14	27.0083
HBEGF	-2.10568	5.72811	-9.58191	1.73224e-16	3.55209e-14	27.0057
TAF1	1.0001	3.34843	9.57619	1.78743e-16	3.62161e-14	26.975
PIM1	-1.93745	5.5011	-9.57577	1.79156e-16	3.62161e-14	26.9727
EIF2S2	0.69276	3.3057	9.57317	1.81729e-16	3.64776e-14	26.9587
WFDC1	1.79124	3.89562	9.55429	2.01532e-16	4.01697e-14	26.8575
FANCE	0.985328	4.10206	9.53737	2.21116e-16	4.37671e-14	26.7667
CHCHD1	1.10895	3.75976	9.52008	2.43084e-16	4.77837e-14	26.674
PDE4B	-1.95539	5.27448	-9.51683	2.47448e-16	4.8114e-14	26.6566
SGTA	0.941029	3.86867	9.51632	2.48141e-16	4.8114e-14	26.6539
REEP2	1.48705	3.23341	9.5009	2.70004e-16	5.19995e-14	26.5712
FBXL12	1.74388	4.26677	9.47954	3.03494e-16	5.80571e-14	26.4568
SPIN1	1.86479	3.83561	9.47577	3.0983e-16	5.84411e-14	26.4365
DLG3	0.48833	3.15174	9.47567	3.09992e-16	5.84411e-14	26.436
SERF1B	1.52443	4.52351	9.4747	3.11653e-16	5.84411e-14	26.4308
SPINK1	0.901563	3.08547	9.47101	3.17997e-16	5.92409e-14	26.4111
PFKM	1.61929	4.77301	9.46167	3.34688e-16	6.19455e-14	26.361
SOCS3	-2.16529	5.15842	-9.45692	3.43497e-16	6.31658e-14	26.3356
HS1BP3	1.29713	4.15738	9.45354	3.49915e-16	6.36825e-14	26.3175
MPP3	0.448121	3.20304	9.45309	3.50776e-16	6.36825e-14	26.3151
ZNF154	-0.419765	3.35566	-9.42332	4.12831e-16	7.44742e-14	26.1556
HS.571946	-0.365803	3.30515	-9.42181	4.16249e-16	7.46186e-14	26.1475
CENPL	1.13355	3.37404	9.41382	4.34857e-16	7.74671e-14	26.1047
CLASP1	1.95161	5.16401	9.3985	4.72838e-16	8.371e-14	26.0228
MX2	-1.44579	4.98065	-9.39597	4.79433e-16	8.43536e-14	26.0092
SV2A	1.77838	3.54305	9.39173	4.90678e-16	8.58024e-14	25.9865
POLR3H	1.26836	4.11959	9.38174	5.18242e-16	9.00699e-14	25.933
RNF141	1.40127	4.00288	9.37569	5.35648e-16	9.25308e-14	25.9007
PIAS3	0.77915	3.8327	9.37191	5.46841e-16	9.3833e-14	25.8805
DLST	2.43853	4.52505	9.37093	5.4977e-16	9.3833e-14	25.8752
ZNF323	0.916694	3.63524	9.35007	6.16174e-16	1.04541e-13	25.7636
PPP1R9A	1.32416	3.11646	9.34647	6.2842e-16	1.05987e-13	25.7444
NSMCE2	1.89816	4.19469	9.33948	6.52874e-16	1.09399e-13	25.707
C3ORF70	1.44689	4.0051	9.33852	6.56322e-16	1.09399e-13	25.7019
ERC1	1.02439	3.65031	9.32968	6.88793e-16	1.14143e-13	25.6546
RECQL	1.73837	4.87807	9.31592	7.42543e-16	1.22339e-13	25.5811
C19ORF31	-3.03017	10.3848	-9.31384	7.5103e-16	1.23026e-13	25.5699
SLC2A8	1.18496	4.68284	9.30381	7.93332e-16	1.29213e-13	25.5163
RNF170	1.68453	3.58128	9.30087	8.06176e-16	1.30559e-13	25.5006
COMMD9	1.42818	4.80787	9.29726	8.22226e-16	1.31682e-13	25.4813
CLUAP1	-3.22676	10.3324	-9.29677	8.24432e-16	1.31682e-13	25.4787
SSBP3	0.817379	3.70255	9.29621	8.26968e-16	1.31682e-13	25.4757
PHF20	1.04249	3.96687	9.29012	8.54888e-16	1.35371e-13	25.4432
MAPK8IP3	-1.45533	5.27891	-9.28384	8.84736e-16	1.39324e-13	25.4096
STK10	-0.90708	4.09558	-9.27254	9.41015e-16	1.47372e-13	25.3492
PCYT2	2.12744	4.03691	9.24989	1.06486e-15	1.65856e-13	25.2282
TMEM56	1.20718	2.9876	9.22548	1.21648e-15	1.88442e-13	25.098
ARHGEF12	1.91265	4.06069	9.22417	1.2252e-15	1.88767e-13	25.091
NBEAL2	-1.11834	4.53437	-9.22021	1.25202e-15	1.91086e-13	25.0698
C9ORF125	0.432985	3.18926	9.21996	1.25366e-15	1.91086e-13	25.0685
DIXDC1	1.46888	3.91228	9.2076	1.3411e-15	2.03326e-13	25.0025
TMEM11	1.66374	3.61843	9.19505	1.43605e-15	2.16571e-13	24.9356
LOC729021	-1.31295	4.43069	-9.18491	1.51766e-15	2.27673e-13	24.8815
KCTD5	1.32185	4.4631	9.18244	1.53823e-15	2.2909e-13	24.8683
MRP63	1.90116	4.77782	9.18124	1.54836e-15	2.2909e-13	24.8619
CCDC126	1.06658	3.32417	9.1809	1.55122e-15	2.2909e-13	24.8601
GPHN	0.885491	3.77263	9.16984	1.64765e-15	2.40934e-13	24.8011
MTMR9	2.07088	4.78878	9.16976	1.64832e-15	2.40934e-13	24.8007
C6ORF162	1.0293	3.21016	9.15864	1.75131e-15	2.54681e-13	24.7413
C21ORF122	0.822285	3.49485	9.15495	1.78689e-15	2.58537e-13	24.7217
RSRC1	1.46618	3.61356	9.15077	1.828e-15	2.6315e-13	24.6994
C8ORF34	1.1582	3.23044	9.14494	1.88696e-15	2.70271e-13	24.6683
NUBP2	1.59245	3.4815	9.1361	1.98014e-15	2.82199e-13	24.6212
PLCD3	0.566554	3.46642	9.13031	2.04356e-15	2.8979e-13	24.5903
ACOT2	1.41157	3.42601	9.12937	2.05403e-15	2.89832e-13	24.5853
USP36	-1.38425	4.70667	-9.12824	2.0667e-15	2.90182e-13	24.5793
IRF7	-1.43099	5.33082	-9.1208	2.15208e-15	3.00689e-13	24.5397
HOXA4	1.49351	3.61944	9.11491	2.22228e-15	3.08983e-13	24.5083
TRABD	-2.00499	6.84735	-9.10454	2.35137e-15	3.23821e-13	24.453
KLHL9	2.32007	4.94195	9.10451	2.35171e-15	3.23821e-13	24.4529
LOC728518	0.743822	3.48877	9.09779	2.43933e-15	3.3427e-13	24.4171
IER5L	0.896158	3.87144	9.09425	2.48679e-15	3.39143e-13	24.3982
WDR82	1.93088	5.54673	9.09272	2.50752e-15	3.40343e-13	24.3901
MAPKBP1	0.737631	3.19584	9.07892	2.70315e-15	3.64508e-13	24.3166
DUS1L	0.968502	3.87206	9.07838	2.71114e-15	3.64508e-13	24.3137
RASAL3	-1.91859	5.68396	-9.07185	2.80916e-15	3.75913e-13	24.279
NSBP1	0.731457	3.65192	9.06634	2.89458e-15	3.85533e-13	24.2496
C6ORF199	0.558799	2.94141	9.06487	2.91781e-15	3.8682e-13	24.2418
TYK2	-1.78119	6.44089	-9.05937	3.00651e-15	3.9667e-13	24.2125
DAPL1	0.982483	3.01843	9.05855	3.01994e-15	3.9667e-13	24.2082
MYST4	0.888825	3.22319	9.05448	3.0875e-15	4.03683e-13	24.1865
PTPRU	2.11345	3.89592	9.05054	3.15432e-15	4.10537e-13	24.1656
DSCC1	0.631819	3.67383	9.04553	3.24143e-15	4.19957e-13	24.1389
ATPBD4	1.5486	3.63358	9.03133	3.50169e-15	4.51622e-13	24.0633
PDZRN3	1.0643	3.64664	9.01507	3.82517e-15	4.91121e-13	23.9769
OSBPL5	1.30162	4.8507	9.0058	4.02287e-15	5.14187e-13	23.9276
PCDH20	0.889506	3.18173	9.00475	4.04592e-15	5.14825e-13	23.922
LOC93622	0.964927	4.12763	9.00383	4.06607e-15	5.1509e-13	23.9171
EPN2	1.39581	4.40819	9.00035	4.14363e-15	5.22592e-13	23.8986
NAT12	0.887121	3.58829	8.99564	4.25104e-15	5.32545e-13	23.8736
KLF15	0.885705	3.40199	8.99526	4.25991e-15	5.32545e-13	23.8715
C9ORF119	1.81155	5.05241	8.98895	4.40837e-15	5.47718e-13	23.838
LAIR1	-3.3456	10.396	-8.98848	4.41972e-15	5.47718e-13	23.8355
C16ORF57	1.05529	4.8986	8.98726	4.44914e-15	5.48977e-13	23.829
LLGL1	1.08021	4.14684	8.98619	4.47499e-15	5.49788e-13	23.8234
ZBTB9	1.23517	3.89137	8.97815	4.67489e-15	5.71881e-13	23.7806
CATSPERB	0.414577	2.80723	8.97397	4.78202e-15	5.80023e-13	23.7584
DNAJC19	2.87256	3.80763	8.97397	4.78215e-15	5.80023e-13	23.7584
CPLX1	-0.822532	3.98243	-8.97218	4.82868e-15	5.81334e-13	23.7489
MSH3	-2.35693	10.2816	-8.97157	4.8449e-15	5.81334e-13	23.7456
AGTR1	1.3505	3.73338	8.97122	4.85413e-15	5.81334e-13	23.7438
UCP2	-2.03598	5.3906	-8.96267	5.08472e-15	6.06401e-13	23.6984
KIAA1161	0.534766	3.11244	8.94605	5.56482e-15	6.60892e-13	23.6101
EFS	0.809129	3.85534	8.94089	5.72281e-15	6.76835e-13	23.5827
THEM2	1.47738	4.53779	8.93704	5.8436e-15	6.88264e-13	23.5623
TMOD1	1.62634	4.48872	8.92988	6.07514e-15	7.12591e-13	23.5243
BEX5	2.36477	3.86691	8.92443	6.25748e-15	7.30971e-13	23.4953
ZFR	1.92576	5.47007	8.92009	6.40634e-15	7.45306e-13	23.4723
ACOX1	1.50492	4.01612	8.90551	6.93363e-15	8.03371e-13	23.3949
HS.543250	1.2233	3.5547	8.90317	7.02207e-15	8.10324e-13	23.3825
LRCH4	-1.2398	4.70435	-8.89788	7.22653e-15	8.27542e-13	23.3545
ADA	-1.16319	4.62947	-8.89781	7.22934e-15	8.27542e-13	23.3541
HS.539765	-0.390901	3.44671	-8.89551	7.32008e-15	8.34577e-13	23.3419
CCDC71	0.8433	3.18193	8.8942	7.37238e-15	8.37191e-13	23.3349
MEIS3P1	1.64291	4.73351	8.89276	7.42996e-15	8.39974e-13	23.3273
ITPR3	-1.84084	5.99723	-8.89212	7.45583e-15	8.39974e-13	23.3239
TMEM30A	1.50171	5.34499	8.89115	7.49528e-15	8.41094e-13	23.3187
CDC42BPA	1.10231	4.04488	8.88942	7.56554e-15	8.45649e-13	23.3096
CFP	-0.411494	3.3149	-8.87483	8.18836e-15	9.11691e-13	23.2322
KIAA1279	2.05736	4.71466	8.87409	8.22146e-15	9.11814e-13	23.2283
LOC652608	0.652641	3.28229	8.87312	8.26472e-15	9.13059e-13	23.2231
TMCC1	1.03108	3.26628	8.86306	8.72743e-15	9.60455e-13	23.1698
FEM1B	0.754735	3.24665	8.85887	8.92804e-15	9.78753e-13	23.1476
ST3GAL2	-0.455647	3.62134	-8.84879	9.42891e-15	1.0297e-12	23.0942
TERF1	1.7986	4.36987	8.84346	9.70542e-15	1.05585e-12	23.0659
CCDC22	0.782773	3.45687	8.84154	9.80688e-15	1.06283e-12	23.0557
TOE1	0.525596	3.18721	8.84053	9.86066e-15	1.06289e-12	23.0504
PRR16	2.09402	3.80539	8.84013	9.88195e-15	1.06289e-12	23.0483
MCF2	1.2944	3.13842	8.83263	1.02918e-14	1.1028e-12	23.0085
OCRL	1.71043	4.99828	8.82686	1.06183e-14	1.13354e-12	22.978
ITIH5	-2.97836	10.2451	-8.82371	1.08004e-14	1.14867e-12	22.9613
CD83	-2.19439	5.65083	-8.80759	1.17854e-14	1.24877e-12	22.876
STON1	2.76751	3.7891	8.80673	1.18405e-14	1.24996e-12	22.8714
C6ORF35	0.910913	3.11583	8.79925	1.23295e-14	1.29678e-12	22.8318
GLB1L	0.85558	3.44002	8.78919	1.3019e-14	1.36426e-12	22.7786
WDFY3	1.31234	3.52733	8.78113	1.3599e-14	1.41983e-12	22.7359
SNORA10	-0.606691	3.69717	-8.77778	1.3848e-14	1.44055e-12	22.7182
CCNL1	-1.78349	5.86684	-8.77552	1.40185e-14	1.44688e-12	22.7062
CLU	0.599947	3.19401	8.77523	1.404e-14	1.44688e-12	22.7047
FZD3	1.17113	3.6022	8.77496	1.40612e-14	1.44688e-12	22.7032
SIGLEC11	0.476203	3.00354	8.77378	1.41511e-14	1.45089e-12	22.697
TMSB4X	-3.13055	10.284	-8.7728	1.4226e-14	1.45335e-12	22.6918
C17ORF56	-0.483092	3.52179	-8.7709	1.43726e-14	1.46308e-12	22.6818
FBXO31	2.09947	5.7598	8.76896	1.45245e-14	1.47328e-12	22.6715
C6ORF47	1.56788	4.71688	8.76616	1.47459e-14	1.49044e-12	22.6567
F2R	-3.28965	10.3181	-8.76364	1.49482e-14	1.50554e-12	22.6434
PASK	-1.09175	4.05597	-8.76119	1.51475e-14	1.52025e-12	22.6304
NAT6	1.6492	3.66572	8.75747	1.54552e-14	1.54569e-12	22.6108
ZBTB47	0.755759	3.68481	8.75619	1.55626e-14	1.55098e-12	22.604
HS.436134	-1.41142	4.53889	-8.75488	1.56731e-14	1.55655e-12	22.5971
RYR3	1.76718	3.85666	8.74974	1.61145e-14	1.59484e-12	22.5699
MRPL1	1.98938	4.63771	8.74816	1.6253e-14	1.60297e-12	22.5615
POLR2C	1.44955	4.84254	8.73931	1.70492e-14	1.6757e-12	22.5148
EPHA4	1.38646	3.82062	8.73742	1.72244e-14	1.6871e-12	22.5048
SLC6A10P	1.24544	4.4454	8.73499	1.74516e-14	1.7035e-12	22.4919
NXF1	-1.43132	5.6968	-8.72738	1.81844e-14	1.76897e-12	22.4517
RANBP3L	1.45825	3.52755	8.71812	1.91177e-14	1.85182e-12	22.4027
ZNF573	2.20182	4.19387	8.71765	1.9166e-14	1.85182e-12	22.4003
SCOC	2.35254	4.96269	8.7098	1.99958e-14	1.92104e-12	22.3588
MED11	1.38035	3.52289	8.7096	2.00172e-14	1.92104e-12	22.3578
CXORF45	-0.938896	3.95291	-8.69909	2.11859e-14	2.02638e-12	22.3023
PIM3	-1.24847	4.71887	-8.69749	2.13696e-14	2.03711e-12	22.2938
TRIB1	-2.26245	6.74946	-8.69144	2.2079e-14	2.09773e-12	22.2619
TBC1D10A	0.85212	3.85934	8.68216	2.32137e-14	2.19821e-12	22.2129
LOC641989	-0.324959	3.25846	-8.67408	2.42483e-14	2.28857e-12	22.1702
KRT7	2.3611	3.50456	8.66013	2.61437e-14	2.45574e-12	22.0966
RND2	0.686647	3.39669	8.65979	2.61918e-14	2.45574e-12	22.0948
ABCD1	1.95088	3.57262	8.65468	2.6923e-14	2.51602e-12	22.0679
AXUD1	-2.32964	7.10518	-8.65308	2.71562e-14	2.52952e-12	22.0594
ZNF416	0.520486	3.29439	8.65158	2.73774e-14	2.53549e-12	22.0515
ATHL1	-1.3551	4.86609	-8.65144	2.73982e-14	2.53549e-12	22.0507
EGR1	-2.44258	7.69844	-8.63632	2.97245e-14	2.73457e-12	21.971
MYOC	0.868896	3.47623	8.63622	2.97413e-14	2.73457e-12	21.9705
SLC22A5	2.03686	3.87071	8.63016	3.0729e-14	2.8163e-12	21.9385
DAP	1.63974	5.20303	8.62231	3.20568e-14	2.92804e-12	21.8972
NFKBIZ	-2.33199	6.78922	-8.62168	3.21659e-14	2.92804e-12	21.8938
KIAA0427	1.22974	4.52489	8.62116	3.22564e-14	2.92804e-12	21.8911
SLC26A10	1.11898	3.43672	8.61623	3.31233e-14	2.99331e-12	21.8652
KHDC1	0.876824	3.08425	8.61589	3.31855e-14	2.99331e-12	21.8633
KRT75	1.71059	3.16753	8.61456	3.34229e-14	3.00522e-12	21.8563
FABP3	1.03933	3.6096	8.61194	3.38992e-14	3.03846e-12	21.8425
NXPH3	1.01058	3.28086	8.60411	3.5359e-14	3.15936e-12	21.8013
FAM133A	0.42657	2.97268	8.6034	3.54946e-14	3.16157e-12	21.7975
LOC23117	-2.38705	8.19281	-8.60073	3.6008e-14	3.19291e-12	21.7835
ZNF223	-1.91327	6.61288	-8.60041	3.60705e-14	3.19291e-12	21.7818
GPR22	0.507435	2.89399	8.5952	3.70982e-14	3.27372e-12	21.7543
BCKDHB	2.63943	4.17033	8.59285	3.75694e-14	3.30506e-12	21.742
SLC4A5	-1.65239	6.61443	-8.58716	3.87395e-14	3.39751e-12	21.712
PCDHB16	1.52355	3.61913	8.58507	3.9178e-14	3.42543e-12	21.701
HSPA4L	1.13306	3.29612	8.58317	3.95803e-14	3.45002e-12	21.691
IGLL1	-2.98752	9.4118	-8.58072	4.0105e-14	3.4851e-12	21.6781
KIAA0649	2.17693	3.53833	8.57928	4.04182e-14	3.50165e-12	21.6705
KAAG1	2.34022	3.4216	8.57647	4.10329e-14	3.53717e-12	21.6557
LOC388789	1.96428	5.82307	8.57628	4.10765e-14	3.53717e-12	21.6547
TRIM52	1.07332	3.7916	8.57383	4.16206e-14	3.57323e-12	21.6418
LAT1-3TM	-0.609692	3.65608	-8.57012	4.24607e-14	3.6344e-12	21.6223
ALS2CR14	-1.08935	4.83585	-8.56778	4.29989e-14	3.66945e-12	21.61
NR2C2	1.53491	3.60204	8.56123	4.45404e-14	3.78586e-12	21.5755
BCL2L1	1.25257	6.222	8.56086	4.46287e-14	3.78586e-12	21.5736
ZFP28	0.682683	2.97617	8.56003	4.48306e-14	3.79171e-12	21.5692
TP53INP2	-1.14809	4.5698	-8.54552	4.84693e-14	4.08734e-12	21.4928
MAGI3	0.756627	2.98334	8.53928	5.01223e-14	4.21426e-12	21.46
SNX15	0.755046	3.04657	8.53767	5.05591e-14	4.23849e-12	21.4516
NUAK2	-0.66116	3.5233	-8.5296	5.28016e-14	4.4135e-12	21.4091
NFATC1	-1.38749	4.45069	-8.52901	5.29703e-14	4.41465e-12	21.406
RAB3IP	-0.867479	4.17886	-8.52718	5.34915e-14	4.4451e-12	21.3964
LOC401357	-1.21624	4.41828	-8.51748	5.63554e-14	4.66947e-12	21.3454
PSCD4	-1.751	5.78237	-8.51556	5.69394e-14	4.69291e-12	21.3353
FAM195B	1.28667	4.7879	8.51547	5.69676e-14	4.69291e-12	21.3349
SNORD14B	-0.272865	3.13974	-8.5112	5.82903e-14	4.78804e-12	21.3124
MTTP	1.06835	2.93296	8.50979	5.87327e-14	4.81051e-12	21.305
C20ORF54	0.673403	3.04103	8.50895	5.9001e-14	4.81864e-12	21.3006
AP4M1	0.971844	3.37905	8.50831	5.92026e-14	4.82129e-12	21.2972
EDC3	0.799535	3.57744	8.5005	6.174e-14	5.01361e-12	21.2562
LOC650580	0.820483	3.2328	8.49176	6.47085e-14	5.23974e-12	21.2103
TLE6	0.820428	3.19957	8.48357	6.76173e-14	5.44586e-12	21.1673
TNK2	-1.52747	5.91881	-8.48352	6.76362e-14	5.44586e-12	21.167
INPP5F	-0.464736	3.80616	-8.48116	6.84975e-14	5.49967e-12	21.1546
DNTTIP1	1.01907	4.64656	8.47635	7.02891e-14	5.62767e-12	21.1294
SEMA6B	-0.690722	3.95989	-8.47298	7.15731e-14	5.71442e-12	21.1117
DKFZP434K191	-1.09229	4.98925	-8.47142	7.21762e-14	5.74647e-12	21.1035
SOLH	-0.645058	3.75601	-8.46927	7.30153e-14	5.79709e-12	21.0922
ATF3	-2.48354	6.46078	-8.46416	7.50422e-14	5.94147e-12	21.0654
P2RY8	-1.61453	4.70934	-8.46108	7.62957e-14	6.02398e-12	21.0492
LPPR2	1.65714	4.04026	8.45788	7.76186e-14	6.1115e-12	21.0324
SNORD35A	-0.304537	3.1952	-8.45251	7.98838e-14	6.27253e-12	21.0043
RPAP2	1.32673	3.81858	8.4518	8.0191e-14	6.27935e-12	21.0005
NAG18	-3.15501	10.2997	-8.4465	8.25055e-14	6.42987e-12	20.9727
SLU7	1.52061	4.36538	8.44636	8.25644e-14	6.42987e-12	20.972
ACOX2	1.64141	4.64607	8.44193	8.45507e-14	6.56662e-12	20.9487
TYW3	0.948515	4.0444	8.43959	8.56174e-14	6.63139e-12	20.9365
ACADVL	-1.02465	7.85733	-8.43666	8.69756e-14	6.71834e-12	20.9211
HLA-B	-2.38988	8.35564	-8.43526	8.76329e-14	6.74626e-12	20.9137
LOC441193	0.966132	3.34445	8.43488	8.78105e-14	6.74626e-12	20.9117
SCGB3A2	1.05	3.29589	8.43196	8.91963e-14	6.83431e-12	20.8964
GNG12	1.12958	3.62743	8.43052	8.98871e-14	6.86878e-12	20.8889
PCSK7	-1.07708	4.95475	-8.42721	9.14981e-14	6.97319e-12	20.8715
PPP1R3D	1.9779	3.72283	8.42506	9.25571e-14	7.03299e-12	20.8603
CXORF56	0.823043	3.10586	8.42462	9.27764e-14	7.03299e-12	20.858
LMAN2	0.773896	4.01471	8.41917	9.55291e-14	7.22245e-12	20.8294
HOXB8	1.21795	3.15693	8.41796	9.61464e-14	7.23986e-12	20.8231
TMEM217	0.73029	3.36161	8.41773	9.62673e-14	7.23986e-12	20.8218
C3ORF75	2.29782	4.8955	8.41281	9.88383e-14	7.4114e-12	20.7961
LTBP1	0.630024	3.13055	8.41238	9.90682e-14	7.4114e-12	20.7938
C10ORF65	2.12613	3.50942	8.40796	1.01443e-13	7.56919e-12	20.7706
LASS4	1.07869	3.3033	8.40503	1.03046e-13	7.6687e-12	20.7553
RBBP5	1.53456	3.57644	8.40303	1.04159e-13	7.73133e-12	20.7448
KCNK15	0.342888	3.03015	8.40007	1.05822e-13	7.8344e-12	20.7293
PKNOX1	1.11002	4.11744	8.39255	1.10173e-13	8.11577e-12	20.6899
ZNF462	1.7976	4.25445	8.39252	1.10192e-13	8.11577e-12	20.6898
NOL3	1.91489	4.14609	8.39166	1.10698e-13	8.13204e-12	20.6853
PNPLA4	0.515359	3.05264	8.3902	1.1157e-13	8.16696e-12	20.6776
DIAPH2	1.52131	4.78032	8.38941	1.12042e-13	8.16696e-12	20.6735
ZNF564	1.18801	3.90326	8.38914	1.12207e-13	8.16696e-12	20.672
FAM127C	1.01591	3.23384	8.38895	1.1232e-13	8.16696e-12	20.6711
BCR	0.786632	3.40392	8.38748	1.13208e-13	8.21061e-12	20.6634
TOMM5	1.80815	5.09699	8.38585	1.14197e-13	8.25089e-12	20.6548
ZNF565	1.44466	3.67168	8.38562	1.14342e-13	8.25089e-12	20.6536
HS.568329	-0.426289	3.45395	-8.38506	1.14681e-13	8.25446e-12	20.6507
SNCG	1.48742	3.87041	8.37938	1.18226e-13	8.47708e-12	20.621
LOC644330	-0.973791	4.23003	-8.37915	1.18369e-13	8.47708e-12	20.6198
KHNYN	-0.938482	4.3314	-8.37287	1.22417e-13	8.74496e-12	20.5869
CA11	0.820732	3.36443	8.37192	1.23044e-13	8.76782e-12	20.5819
LOC653489	-2.11654	7.72871	-8.36755	1.25955e-13	8.9334e-12	20.559
CCDC43	1.25178	4.03506	8.36749	1.25995e-13	8.9334e-12	20.5587
XIAP	2.37601	3.49343	8.36482	1.27812e-13	9.02805e-12	20.5447
HOXA2	0.621631	3.52913	8.3646	1.27963e-13	9.02805e-12	20.5436
RASD2	0.759801	3.58784	8.36407	1.28327e-13	9.03136e-12	20.5408
ZNF699	0.487449	3.2532	8.36159	1.30037e-13	9.12918e-12	20.5279
KLHL17	2.0126	3.68096	8.35959	1.3144e-13	9.20497e-12	20.5174
MRPS11	1.53372	5.12701	8.35858	1.32151e-13	9.23208e-12	20.5121
MRPL33	1.72847	6.66612	8.35705	1.33239e-13	9.28534e-12	20.5041
PCDH9	1.58659	3.47716	8.34674	1.40797e-13	9.78811e-12	20.4501
CUX1	1.40741	3.41157	8.34483	1.4224e-13	9.8644e-12	20.4402
DOCK5	1.48469	3.40447	8.34163	1.44695e-13	1.00103e-11	20.4234
THAP6	1.1437	3.65719	8.33867	1.47009e-13	1.01457e-11	20.4079
HS.508682	-2.65444	9.05987	-8.33781	1.47682e-13	1.01676e-11	20.4035
CHRNB1	0.798227	3.72863	8.33563	1.49418e-13	1.02623e-11	20.392
LOC389517	-2.2753	9.62342	-8.33491	1.49989e-13	1.02768e-11	20.3883
LOC338758	-1.47464	5.33927	-8.31814	1.64063e-13	1.12142e-11	20.3006
TOMM40L	1.73177	4.46297	8.31032	1.71062e-13	1.16646e-11	20.2598
C4ORF49	0.954613	3.30601	8.30777	1.73414e-13	1.17967e-11	20.2464
UBE2V1	1.30679	3.45349	8.30644	1.74649e-13	1.18524e-11	20.2395
MYO1G	-1.30914	4.79866	-8.30378	1.77145e-13	1.19768e-11	20.2256
CXCL2	-2.0713	5.07472	-8.3036	1.77323e-13	1.19768e-11	20.2246
ZER1	1.38893	3.98306	8.30254	1.78324e-13	1.2016e-11	20.2191
PRDX3	2.21734	5.75554	8.29909	1.81646e-13	1.2211e-11	20.2011
ZNF766	0.802666	3.94256	8.29677	1.83914e-13	1.23343e-11	20.189
LOC653086	-2.36459	8.36259	-8.29297	1.87683e-13	1.25576e-11	20.1691
DAB2IP	2.00597	3.67365	8.28688	1.93888e-13	1.29424e-11	20.1373
TNFAIP8L1	1.63579	3.7803	8.2831	1.97844e-13	1.31756e-11	20.1176
NECAB3	1.58889	3.61111	8.28011	2.01024e-13	1.33561e-11	20.102
CCDC105	1.20123	3.01507	8.27869	2.02552e-13	1.34264e-11	20.0946
NFKBIB	0.86818	3.72743	8.2712	2.10819e-13	1.39419e-11	20.0555
LOC400721	-1.44546	9.94857	-8.26827	2.14137e-13	1.41285e-11	20.0402
HS.561915	0.849077	3.51472	8.26476	2.1819e-13	1.43627e-11	20.0219
C19ORF52	1.30706	3.87112	8.2633	2.19901e-13	1.44104e-11	20.0143
EIF2A	1.66002	5.82287	8.26328	2.19925e-13	1.44104e-11	20.0142
GPRASP2	2.05193	4.34457	8.26184	2.21614e-13	1.44878e-11	20.0067
TAS2R45	0.5191	2.87525	8.25911	2.2487e-13	1.4667e-11	19.9924
NIPSNAP3B	1.00661	3.04003	8.25855	2.25545e-13	1.46774e-11	19.9895
C15ORF41	0.793157	3.37583	8.25144	2.34268e-13	1.52104e-11	19.9524
RN7SL1	-2.91991	10.108	-8.24931	2.36938e-13	1.53488e-11	19.9413
FAM110A	-0.693008	3.94584	-8.24149	2.47036e-13	1.59666e-11	19.9005
TMEM38A	1.07915	3.28225	8.23976	2.49323e-13	1.6078e-11	19.8915
LOC648434	0.738987	3.20591	8.22783	2.65695e-13	1.70951e-11	19.8294
MANSC1	0.579311	3.4354	8.22393	2.71276e-13	1.74148e-11	19.809
TNFSF9	-0.409264	3.35417	-8.22142	2.7493e-13	1.76097e-11	19.796
ALOX15B	1.06029	3.56254	8.21651	2.82219e-13	1.80361e-11	19.7704
ZNF517	0.712659	3.27158	8.20757	2.95993e-13	1.88741e-11	19.7238
CCDC51	1.80395	3.91959	8.2021	3.04749e-13	1.9389e-11	19.6953
SLITRK4	2.39446	4.03933	8.20087	3.06749e-13	1.94727e-11	19.6889
PLXDC1	-0.308576	3.24629	-8.19761	3.12117e-13	1.97695e-11	19.672
C6ORF168	1.61282	3.19422	8.19475	3.16916e-13	2.00289e-11	19.6571
AIRE	-2.63977	9.16693	-8.19019	3.24711e-13	2.04762e-11	19.6333
C22ORF32	1.59713	3.8611	8.18299	3.3739e-13	2.12288e-11	19.5959
HS.374221	-0.306323	3.29957	-8.18212	3.3895e-13	2.12736e-11	19.5914
C1ORF102	1.78895	3.21027	8.18177	3.39596e-13	2.12736e-11	19.5895
CCL2	-2.67211	7.72501	-8.17994	3.4291e-13	2.14342e-11	19.58
LOC641849	1.40013	3.5925	8.1769	3.48514e-13	2.17368e-11	19.5642
PIGM	0.927982	4.34427	8.17575	3.50655e-13	2.18225e-11	19.5582
LGR4	1.68491	3.1956	8.16823	3.64969e-13	2.26639e-11	19.5191
LMNB1	-0.418342	3.36688	-8.16761	3.66171e-13	2.26891e-11	19.5159
NR2C2AP	0.970181	4.1948	8.16358	3.74102e-13	2.31302e-11	19.4949
HAND2	0.746326	3.40314	8.16196	3.77344e-13	2.32802e-11	19.4865
MSH5	-0.315035	3.18942	-8.16029	3.80722e-13	2.34378e-11	19.4778
C2ORF16	0.850473	2.9653	8.15644	3.88604e-13	2.38715e-11	19.4577
DNM1L	1.12628	4.1474	8.15135	3.99269e-13	2.44739e-11	19.4313
TRAP1	1.0578	4.53374	8.14944	4.03338e-13	2.46702e-11	19.4214
LTB	-2.48796	5.7913	-8.14226	4.19036e-13	2.55645e-11	19.3841
RNF185	0.890482	3.84935	8.14179	4.20088e-13	2.55645e-11	19.3816
PPIL6	0.676515	3.0131	8.14154	4.2065e-13	2.55645e-11	19.3803
TBCC	0.684322	3.65347	8.14018	4.2369e-13	2.56946e-11	19.3733
AHR	-2.31393	8.51745	-8.13949	4.25257e-13	2.57348e-11	19.3697
RAD51	-1.05952	4.81613	-8.13725	4.30348e-13	2.59878e-11	19.358
SLC22A17	1.27099	4.96021	8.13515	4.35176e-13	2.62237e-11	19.3471
ZFP112	0.786431	3.63838	8.13366	4.38646e-13	2.63391e-11	19.3394
TBC1D10C	-1.52946	4.91144	-8.1333	4.39485e-13	2.63391e-11	19.3375
SETD7	0.282507	2.85133	8.13313	4.39862e-13	2.63391e-11	19.3367
PRKAB2	1.48885	4.46299	8.12826	4.51407e-13	2.69737e-11	19.3113
NFKBIL1	0.607419	3.02957	8.12762	4.52951e-13	2.70093e-11	19.308
STK38L	1.17949	3.84141	8.12687	4.54749e-13	2.706e-11	19.3041
MMP28	1.47921	3.69766	8.12289	4.64472e-13	2.75354e-11	19.2835
ZNF132	1.22276	3.19971	8.12281	4.64672e-13	2.75354e-11	19.283
SIX4	0.894825	3.53758	8.11856	4.75285e-13	2.81059e-11	19.261
KBTBD3	0.330866	3.13779	8.11183	4.92585e-13	2.90687e-11	19.226
LENG9	1.26778	3.03454	8.11064	4.95716e-13	2.9193e-11	19.2198
SLC35D2	2.04083	4.28994	8.11005	4.97274e-13	2.92244e-11	19.2168
LIME1	-1.56555	5.26226	-8.10417	5.13028e-13	3.00882e-11	19.1863
PCDHB5	0.426515	3.10982	8.10348	5.14926e-13	3.01374e-11	19.1827
SARM1	1.52278	3.8514	8.10281	5.16759e-13	3.01828e-11	19.1792
METTL14	0.670578	3.39739	8.10006	5.24353e-13	3.05636e-11	19.165
ARMC7	1.26729	3.82729	8.09901	5.27299e-13	3.06727e-11	19.1595
KIAA0101	-2.98545	10.0508	-8.09383	5.41985e-13	3.14627e-11	19.1326
COL1A1	-2.52315	7.36925	-8.08894	5.56232e-13	3.22241e-11	19.1073
MAP9	0.371781	3.02593	8.08799	5.59061e-13	3.23223e-11	19.1023
MASP1	0.547647	3.13327	8.0784	5.88244e-13	3.39407e-11	19.0526
PRKD2	-0.881493	4.26395	-8.07577	5.96508e-13	3.4348e-11	19.039
PROM2	1.09933	3.29353	8.07366	6.03235e-13	3.46653e-11	19.028
LOC730273	0.732235	3.46454	8.07286	6.0579e-13	3.47421e-11	19.0239
ROCK2	-3.04566	10.1039	-8.071	6.11811e-13	3.5017e-11	19.0142
HS.543887	0.607593	3.37295	8.06861	6.19598e-13	3.53916e-11	19.0019
MCFD2	2.1718	5.10046	8.06741	6.23554e-13	3.55463e-11	18.9956
RASSF3	1.16442	3.06628	8.06631	6.27213e-13	3.56836e-11	18.9899
PRPF38A	1.13491	4.25298	8.06522	6.30839e-13	3.58184e-11	18.9843
LOC283174	1.27319	3.30832	8.06323	6.37531e-13	3.60677e-11	18.974
SPIN3	1.17999	3.72733	8.06316	6.37762e-13	3.60677e-11	18.9736
SDHALP1	-2.01598	8.24937	-8.06272	6.39262e-13	3.60809e-11	18.9713
CCNO	0.868943	3.45522	8.06036	6.47321e-13	3.64636e-11	18.9591
ECEL1	0.745545	2.96116	8.05869	6.53088e-13	3.67159e-11	18.9504
LOC346950	2.42033	3.82306	8.05144	6.78659e-13	3.80784e-11	18.9129
DNAJC7	2.0731	5.10847	8.04915	6.86971e-13	3.8469e-11	18.901
CXXC1	-1.40425	6.07339	-8.04869	6.88639e-13	3.84868e-11	18.8986
SLC41A2	0.648769	3.50959	8.04144	7.15619e-13	3.99164e-11	18.8611
SFRS13B	1.13511	3.04014	8.03485	7.41051e-13	4.12543e-11	18.827
FAM128A	0.898271	3.50016	8.0325	7.50328e-13	4.15654e-11	18.8148
HLA-DMA	-2.25318	7.63092	-8.0324	7.50735e-13	4.15654e-11	18.8143
SRFBP1	0.755173	3.55017	8.03233	7.51015e-13	4.15654e-11	18.8139
CEP164	1.12983	4.13767	8.03068	7.57583e-13	4.18476e-11	18.8054
FARSLB	-2.92252	10.0761	-8.03025	7.59318e-13	4.18623e-11	18.8032
HS.561418	-0.282179	3.15066	-8.02823	7.67503e-13	4.22319e-11	18.7927
CYGB	-1.38686	5.11854	-8.02777	7.69358e-13	4.22524e-11	18.7903
KIAA0895	1.40635	3.31111	8.01874	8.07042e-13	4.42368e-11	18.7436
COIL	1.32526	4.65295	8.01796	8.10395e-13	4.43353e-11	18.7396
C2ORF27A	0.953788	2.9975	8.01751	8.12305e-13	4.43546e-11	18.7373
PGR	0.324572	2.89941	8.01606	8.18602e-13	4.4613e-11	18.7297
ST6GALNAC6	1.12586	5.52893	8.01301	8.31916e-13	4.51668e-11	18.714
C10ORF61	2.36345	4.12524	8.01301	8.31933e-13	4.51668e-11	18.7139
MFAP2	1.52211	3.90927	8.00951	8.47484e-13	4.58458e-11	18.6958
PCNX	-1.16374	5.18663	-8.00947	8.47655e-13	4.58458e-11	18.6956
TCAP	1.1352	3.10494	8.00455	8.70008e-13	4.69656e-11	18.6702
PBX2	1.3275	4.39119	8.00167	8.83392e-13	4.7598e-11	18.6553
HS.576072	-0.941601	4.52737	-7.99451	9.17499e-13	4.93424e-11	18.6183
HS.557622	2.05075	3.49559	7.99225	9.28533e-13	4.98418e-11	18.6066
FAM46C	-2.2905	6.30055	-7.99087	9.3535e-13	5.01133e-11	18.5995
GALM	1.04666	4.16977	7.98991	9.40084e-13	5.02725e-11	18.5945
UBXN6	1.51368	4.99789	7.98495	9.65099e-13	5.15135e-11	18.5689
TBRG4	1.29529	4.57848	7.98175	9.81545e-13	5.22039e-11	18.5524
ITGAE	1.72592	5.01198	7.98172	9.81696e-13	5.22039e-11	18.5522
GTF2H1	1.68859	3.925	7.97951	9.93272e-13	5.27206e-11	18.5408
JPH1	0.365359	2.89554	7.97916	9.95112e-13	5.27206e-11	18.539
ST6GALNAC4	2.01698	4.69948	7.97842	9.99003e-13	5.28285e-11	18.5351
UBL5	1.58717	5.93637	7.97712	1.00589e-12	5.30945e-11	18.5284
RBMY2FP	1.44228	3.23095	7.97123	1.03768e-12	5.46709e-11	18.498
MBOAT2	0.684579	3.58324	7.96801	1.05555e-12	5.55098e-11	18.4814
C8ORF40	1.59118	5.47761	7.9651	1.07191e-12	5.62664e-11	18.4663
NRG2	1.25487	3.01282	7.96108	1.09489e-12	5.73668e-11	18.4456
FAM181B	0.605856	3.10345	7.95903	1.10684e-12	5.7887e-11	18.435
ZNF501	0.495409	2.9085	7.95783	1.11389e-12	5.81488e-11	18.4288
METT10D	0.792989	3.44325	7.95658	1.12122e-12	5.84244e-11	18.4224
THAP4	0.787944	2.94436	7.95413	1.13589e-12	5.90806e-11	18.4097
FCGR2C	1.03421	2.95462	7.95295	1.14299e-12	5.93417e-11	18.4036
CD74	-2.82729	9.10948	-7.95157	1.15131e-12	5.96023e-11	18.3965
LILRB3	-2.81702	9.84616	-7.95143	1.15219e-12	5.96023e-11	18.3958
F10	2.25302	3.89597	7.95107	1.15437e-12	5.96071e-11	18.3939
XPA	1.62528	3.98193	7.95008	1.16042e-12	5.98108e-11	18.3888
FZD9	1.29417	3.16467	7.94915	1.16612e-12	5.99961e-11	18.384
MC1R	-0.764675	4.16578	-7.94035	1.22165e-12	6.25659e-11	18.3386
POLR1B	0.649374	3.415	7.94034	1.22167e-12	6.25659e-11	18.3386
FBXL17	0.922269	3.2277	7.94019	1.22265e-12	6.25659e-11	18.3378
CAMTA2	1.38828	3.20587	7.93965	1.22616e-12	6.26332e-11	18.335
PSKH1	1.5591	3.32168	7.93606	1.24964e-12	6.3718e-11	18.3165
CEP27	-1.76854	6.60957	-7.93354	1.26635e-12	6.44552e-11	18.3035
SLC27A5	0.561581	3.32289	7.92885	1.29809e-12	6.59526e-11	18.2793
MGC18216	1.30865	4.47981	7.92409	1.33111e-12	6.75102e-11	18.2548
SPOCK2	-1.90571	5.51108	-7.92314	1.33779e-12	6.77282e-11	18.2499
ZNF558	1.01328	3.9368	7.9221	1.34516e-12	6.79113e-11	18.2445
TNFAIP2	-0.953717	4.03527	-7.92191	1.34654e-12	6.79113e-11	18.2435
NLRP3	-1.30071	4.53325	-7.92163	1.34855e-12	6.79113e-11	18.242
TRIM26	-0.93414	4.7581	-7.91684	1.38303e-12	6.95248e-11	18.2174
C1ORF19	2.47197	4.6983	7.91142	1.42315e-12	7.14154e-11	18.1895
ELOF1	0.855683	4.30183	7.91089	1.42717e-12	7.14915e-11	18.1867
OSBPL3	-0.898153	3.82424	-7.90317	1.4865e-12	7.43326e-11	18.1469
CRIPAK	-1.1611	4.57699	-7.90128	1.50139e-12	7.49459e-11	18.1372
ZNF385D	1.12951	4.54924	7.90072	1.5058e-12	7.50348e-11	18.1343
LOC641700	2.07463	3.62177	7.89986	1.51264e-12	7.5244e-11	18.1299
ARG2	1.79158	3.50039	7.89845	1.52391e-12	7.56726e-11	18.1226
CRSP6	1.33272	3.22704	7.89646	1.54001e-12	7.63391e-11	18.1124
IRF2	-0.461152	3.51983	-7.89504	1.55158e-12	7.67788e-11	18.1051
RAB9P1	1.17079	3.16403	7.89208	1.57601e-12	7.78526e-11	18.0898
RARB	1.76717	3.6894	7.88975	1.59546e-12	7.86769e-11	18.0778
CCR6	-2.22149	10.1992	-7.88786	1.61144e-12	7.92099e-11	18.0681
HRASLS3	2.09071	6.29081	7.88781	1.61182e-12	7.92099e-11	18.0678
WDR3	1.5045	3.12763	7.88705	1.61829e-12	7.93911e-11	18.0639
ANXA10	1.9613	3.36596	7.88289	1.65415e-12	8.10109e-11	18.0425
ELP4	0.73902	3.42031	7.88142	1.66706e-12	8.14085e-11	18.0349
SSH1	1.5222	3.54417	7.88131	1.66798e-12	8.14085e-11	18.0344
MORF4	0.465441	2.80554	7.87816	1.69598e-12	8.26332e-11	18.0181
METTL8	0.534963	2.96657	7.87185	1.75327e-12	8.52791e-11	17.9857
LOC728308	-0.244814	3.16038	-7.87034	1.76725e-12	8.58127e-11	17.9779
MAST4	1.38379	3.5786	7.86815	1.78781e-12	8.66633e-11	17.9666
PPL	0.869763	3.60261	7.86606	1.80757e-12	8.74721e-11	17.9559
ZNF486	-2.42099	8.9673	-7.86452	1.82233e-12	8.80373e-11	17.948
BAGE3	0.416361	2.93796	7.86365	1.83068e-12	8.82906e-11	17.9435
MGC16703	-2.90666	10.018	-7.86054	1.86088e-12	8.95958e-11	17.9275
NR4A3	-1.27027	3.98696	-7.85836	1.88239e-12	9.04786e-11	17.9163
CST7	-1.06362	4.16078	-7.85629	1.90297e-12	9.13137e-11	17.9057
LOC649305	0.727473	3.28334	7.85346	1.93152e-12	9.2528e-11	17.8911
REP15	1.66502	3.35746	7.84861	1.98156e-12	9.46777e-11	17.8661
PTGS2	-2.20346	6.10348	-7.84828	1.985e-12	9.46777e-11	17.8644
LOC285908	-0.577837	3.6133	-7.84815	1.98636e-12	9.46777e-11	17.8638
IER3	-1.84664	7.07981	-7.84691	1.99935e-12	9.51378e-11	17.8574
PRKD3	0.428787	3.31177	7.84613	2.00753e-12	9.53677e-11	17.8534
MGC35361	1.04166	3.49936	7.84466	2.02318e-12	9.5951e-11	17.8458
CYR61	-2.54213	7.93918	-7.84332	2.03746e-12	9.63797e-11	17.839
HS.28456	0.520573	3.32973	7.84295	2.04146e-12	9.63797e-11	17.8371
HSPA2	1.17688	4.30004	7.84286	2.04236e-12	9.63797e-11	17.8366
PCMT1	1.98093	6.84477	7.8417	2.05494e-12	9.68131e-11	17.8306
KIAA1160	1.45627	4.6085	7.83587	2.1189e-12	9.96619e-11	17.8007
LOC728844	-0.304967	3.19437	-7.83439	2.13542e-12	1.00273e-10	17.7931
ZNF509	0.773073	3.49781	7.83329	2.14789e-12	1.00693e-10	17.7874
NSFL1C	1.01013	4.66501	7.82996	2.18586e-12	1.02305e-10	17.7703
LOC641825	-0.941142	4.13767	-7.82665	2.22422e-12	1.03929e-10	17.7533
GADL1	0.618198	2.88267	7.82538	2.23914e-12	1.04455e-10	17.7468
CPS1	1.71785	3.59752	7.82458	2.24859e-12	1.04563e-10	17.7427
SAMHD1	1.45804	3.08876	7.82456	2.24878e-12	1.04563e-10	17.7426
TPPP2	1.03383	2.92625	7.82332	2.2635e-12	1.05036e-10	17.7362
KLF2	-2.4582	8.30567	-7.82284	2.26927e-12	1.05036e-10	17.7337
EGR2	-2.04458	5.28262	-7.82277	2.27002e-12	1.05036e-10	17.7334
ZCCHC3	1.2928	3.89335	7.82195	2.27992e-12	1.05323e-10	17.7292
TMEM61	1.08041	3.32956	7.82103	2.29096e-12	1.05662e-10	17.7244
LAS1L	0.703187	4.43697	7.8194	2.3106e-12	1.06396e-10	17.7161
CIP29	2.0209	6.45056	7.81801	2.32756e-12	1.06873e-10	17.709
LRTOMT	0.506269	3.25385	7.81778	2.33043e-12	1.06873e-10	17.7078
ORC6L	-2.87808	10.1309	-7.81755	2.33318e-12	1.06873e-10	17.7066
ZNF641	0.951274	3.74026	7.81733	2.33596e-12	1.06873e-10	17.7054
SLC6A4	1.16419	2.93621	7.81424	2.37416e-12	1.08447e-10	17.6896
LMBR1L	-0.292742	3.3722	-7.81368	2.38114e-12	1.08592e-10	17.6867
ZNF296	-0.914798	3.94997	-7.81115	2.41309e-12	1.09873e-10	17.6737
FUT11	1.53723	3.51387	7.80959	2.43287e-12	1.10596e-10	17.6657
PAFAH1B3	-0.969859	4.36749	-7.80565	2.4838e-12	1.12657e-10	17.6455
TCFL5	1.9953	4.46314	7.8051	2.49096e-12	1.12657e-10	17.6427
LMF1	1.22997	3.37213	7.80494	2.49309e-12	1.12657e-10	17.6419
GGA1	-1.85014	10.1216	-7.80487	2.49401e-12	1.12657e-10	17.6415
UBE2O	0.889022	3.80281	7.80281	2.52118e-12	1.13704e-10	17.6309
HEXIM2	0.781101	3.43912	7.8022	2.52931e-12	1.13891e-10	17.6278
KCNK6	1.05464	4.46101	7.80184	2.53405e-12	1.13924e-10	17.626
VANGL1	0.702489	2.93659	7.79752	2.59227e-12	1.16329e-10	17.6038
FBXL6	-0.382431	3.72386	-7.79727	2.59569e-12	1.16329e-10	17.6025
PRSS35	0.686089	3.44193	7.79575	2.61638e-12	1.16948e-10	17.5947
PTPN7	-0.664044	3.71719	-7.79566	2.61771e-12	1.16948e-10	17.5942
GULP1	0.66839	3.06666	7.79514	2.62486e-12	1.17083e-10	17.5916
TBC1D24	1.42792	3.3169	7.79288	2.65614e-12	1.18294e-10	17.58
FITM2	1.05744	2.97382	7.79235	2.66353e-12	1.18438e-10	17.5773
SHKBP1	-0.693764	3.94963	-7.79112	2.68082e-12	1.19021e-10	17.571
OR10AG1	1.0721	3.00891	7.79046	2.69015e-12	1.19249e-10	17.5676
OR52B4	0.868141	2.86934	7.78942	2.70489e-12	1.19717e-10	17.5622
ID4	1.19679	3.77339	7.78889	2.71245e-12	1.19865e-10	17.5595
FLJ10781	0.861884	3.50737	7.78807	2.72407e-12	1.20192e-10	17.5553
ODF2L	-0.502566	3.64987	-7.78751	2.73219e-12	1.20364e-10	17.5524
ZNF32	1.04149	4.64439	7.78698	2.7398e-12	1.20513e-10	17.5497
MTCH2	0.504986	3.43125	7.78397	2.78349e-12	1.22246e-10	17.5343
LOC613037	-2.21014	8.09171	-7.77957	2.84841e-12	1.24905e-10	17.5118
FAM177A1	-3.02968	10.1134	-7.77533	2.91263e-12	1.27525e-10	17.49
HS.560387	0.617627	3.39825	7.77381	2.93593e-12	1.28151e-10	17.4822
CLDN20	0.686066	3.17936	7.77381	2.93593e-12	1.28151e-10	17.4822
HDAC6	1.06253	4.53004	7.77094	2.98054e-12	1.299e-10	17.4675
ZC3H18	1.50027	3.87038	7.76904	3.01028e-12	1.30996e-10	17.4578
RPL23AP13	1.56648	4.6876	7.76766	3.03218e-12	1.31747e-10	17.4507
SFRS17A	-1.55124	6.07007	-7.76676	3.04652e-12	1.32169e-10	17.4461
SYNGR2	0.948033	2.94599	7.76532	3.06969e-12	1.32972e-10	17.4387
ARMC10	1.30642	4.9208	7.76416	3.08834e-12	1.33577e-10	17.4328
SSX5	0.41479	2.91859	7.76358	3.09789e-12	1.33787e-10	17.4298
UBA7	-1.36597	5.50012	-7.76269	3.11233e-12	1.34207e-10	17.4252
KLKB1	1.24131	3.35145	7.76153	3.13126e-12	1.34819e-10	17.4193
DYSF	-1.12505	4.81462	-7.76119	3.13692e-12	1.34859e-10	17.4175
FKBP10	0.632341	3.41055	7.75702	3.20624e-12	1.37632e-10	17.3962
LOC643433	-1.90466	7.78448	-7.75442	3.25031e-12	1.39314e-10	17.3829
ZNF286A	1.30583	3.10806	7.75404	3.25675e-12	1.3938e-10	17.3809
LOC644642	-1.10227	4.86346	-7.75328	3.26987e-12	1.39732e-10	17.377
LOC728715	-0.976045	3.96137	-7.75201	3.2916e-12	1.4045e-10	17.3705
FICD	1.14791	3.8911	7.75081	3.31248e-12	1.4113e-10	17.3644
TMEM176A	-1.21477	4.9128	-7.74987	3.3288e-12	1.41427e-10	17.3596
HLA-H	-2.12934	8.49313	-7.74976	3.33078e-12	1.41427e-10	17.359
TBC1D3G	-0.50248	3.64976	-7.74955	3.33435e-12	1.41427e-10	17.3579
C9ORF130	-1.28359	5.49022	-7.74904	3.34341e-12	1.41601e-10	17.3553
KLHL10	1.87695	3.08958	7.74771	3.36673e-12	1.42377e-10	17.3485
AP1G2	-1.1137	4.39113	-7.74644	3.38918e-12	1.43114e-10	17.342
RHOBTB3	1.55937	4.6429	7.74589	3.39898e-12	1.43315e-10	17.3392
DPM1	1.75991	5.37576	7.7421	3.46719e-12	1.45975e-10	17.3198
NLF2	-1.67008	4.54042	-7.73987	3.50797e-12	1.47474e-10	17.3084
RAC2	-2.21473	6.66442	-7.73702	3.56069e-12	1.493e-10	17.2938
AKAP8L	0.633491	3.48326	7.73691	3.56284e-12	1.493e-10	17.2932
NHP2	1.03943	4.81458	7.73644	3.57166e-12	1.493e-10	17.2908
MSTN	2.22222	3.15308	7.7364	3.57234e-12	1.493e-10	17.2906
CDH8	0.876156	3.09924	7.73607	3.57852e-12	1.49339e-10	17.2889
TSTA3	0.851068	3.79996	7.73323	3.63219e-12	1.51357e-10	17.2744
ZMAT5	2.50446	4.27884	7.73148	3.6657e-12	1.52531e-10	17.2654
GPR25	0.917888	2.87743	7.72737	3.74548e-12	1.55419e-10	17.2444
LOC653344	-0.499212	3.55175	-7.72734	3.74601e-12	1.55419e-10	17.2443
CLDN9	0.661287	3.08114	7.72201	3.85216e-12	1.5959e-10	17.217
SLC7A5	-1.73067	5.03827	-7.72122	3.86815e-12	1.6002e-10	17.213
COG4	1.9391	4.3734	7.7191	3.91123e-12	1.61568e-10	17.2021
MYNN	1.87338	4.26976	7.71842	3.92534e-12	1.61916e-10	17.1986
HS.558911	1.26454	3.54785	7.71783	3.93737e-12	1.62178e-10	17.1956
HS.37204	0.607302	3.24521	7.71547	3.98638e-12	1.63959e-10	17.1836
ZNF44	0.636693	2.80202	7.71481	4.00013e-12	1.64288e-10	17.1802
SAT1	-2.41653	8.43839	-7.712	4.05954e-12	1.66488e-10	17.1658
C9ORF90	2.07945	4.26782	7.70932	4.11677e-12	1.68592e-10	17.1521
HS.254006	1.42701	3.88051	7.7084	4.13678e-12	1.68939e-10	17.1474
CAMSAP1	1.55116	4.42189	7.70838	4.13709e-12	1.68939e-10	17.1473
JUND	-2.01846	9.4364	-7.7069	4.16932e-12	1.70012e-10	17.1397
ZSCAN22	0.305305	3.0237	7.70569	4.19569e-12	1.70842e-10	17.1336
RLBP1L1	0.540989	2.85443	7.70512	4.20824e-12	1.71109e-10	17.1307
TP53RK	1.39645	4.10825	7.69996	4.3235e-12	1.75545e-10	17.1043
C15ORF29	1.5627	3.88297	7.69901	4.34512e-12	1.76172e-10	17.0994
MRPS34	2.22299	3.83586	7.69823	4.36295e-12	1.76644e-10	17.0954
FYN	-1.51324	5.39632	-7.69713	4.38794e-12	1.77403e-10	17.0899
C1ORF58	1.43708	3.02491	7.6966	4.40023e-12	1.77648e-10	17.0871
CCL3L3	-2.29906	5.97053	-7.69578	4.41906e-12	1.78156e-10	17.083
TDRD5	0.601517	2.77661	7.69429	4.45364e-12	1.79085e-10	17.0753
MYCBP	1.38915	3.15674	7.69423	4.45508e-12	1.79085e-10	17.075
KRT86	0.458399	3.02436	7.69398	4.46095e-12	1.79085e-10	17.0737
MVK	0.306377	3.08516	7.68939	4.56946e-12	1.83183e-10	17.0503
MRTO4	1.36757	3.98923	7.68884	4.58244e-12	1.83446e-10	17.0475
HSPB7	1.90648	4.63581	7.68671	4.6339e-12	1.85246e-10	17.0366
NOC4L	1.09075	3.66378	7.6858	4.65596e-12	1.85867e-10	17.032
CCDC55	1.51847	4.16299	7.68517	4.67125e-12	1.86216e-10	17.0288
TTTY9B	1.08288	2.90785	7.68451	4.68747e-12	1.86287e-10	17.0254
MEI1	-0.648667	3.63023	-7.68417	4.69593e-12	1.86287e-10	17.0236
IFT81	1.32206	3.24564	7.68407	4.69834e-12	1.86287e-10	17.0231
TCEAL5	0.778615	3.13024	7.68404	4.69916e-12	1.86287e-10	17.023
SNAPC5	0.809363	3.48293	7.68304	4.72365e-12	1.86997e-10	17.0179
CHCHD6	0.95702	3.92589	7.67931	4.81685e-12	1.90423e-10	16.9988
IYD	0.920856	2.90779	7.67826	4.84337e-12	1.91206e-10	16.9934
DGKI	1.41553	3.05082	7.67777	4.85577e-12	1.9143e-10	16.991
SGK	-2.34895	7.49739	-7.6768	4.88026e-12	1.9213e-10	16.986
TRPC1	1.12291	4.08377	7.67557	4.91183e-12	1.93106e-10	16.9797
MARK2	1.10315	3.46454	7.6746	4.93697e-12	1.93827e-10	16.9748
ECHDC3	1.35932	3.95081	7.66973	5.06425e-12	1.9855e-10	16.9499
ARHGAP30	-1.50573	5.04202	-7.66802	5.10959e-12	2.00053e-10	16.9412
TNRC15	2.18952	4.63884	7.66752	5.12301e-12	2.00303e-10	16.9386
RAXL1	-1.31451	6.27822	-7.66718	5.13196e-12	2.00379e-10	16.9369
CCDC97	1.57993	5.02643	7.66629	5.1561e-12	2.01046e-10	16.9324
KIAA0133	0.64905	3.51948	7.66595	5.16519e-12	2.01125e-10	16.9306
FLJ40113	-0.36543	3.44639	-7.66476	5.19728e-12	2.01961e-10	16.9246
TAS2R39	1.79117	3.17312	7.66463	5.20082e-12	2.01961e-10	16.9239
ANKRD16	1.387	3.75744	7.66378	5.22407e-12	2.02587e-10	16.9196
CNGA2	0.414546	2.87069	7.66284	5.24982e-12	2.03309e-10	16.9148
CSF3R	-1.8461	5.47261	-7.66186	5.27682e-12	2.03867e-10	16.9098
VDR	-0.509601	3.47379	-7.66163	5.28303e-12	2.03867e-10	16.9086
KCNJ3	1.1021	2.9301	7.66154	5.28568e-12	2.03867e-10	16.9081
HDGF2	1.67431	3.76019	7.66082	5.3054e-12	2.04351e-10	16.9045
IFRG15	1.44852	3.01758	7.65715	5.40819e-12	2.08029e-10	16.8858
SCUBE3	0.518352	3.01272	7.65536	5.45905e-12	2.09703e-10	16.8766
LOC641705	1.10005	3.30875	7.65504	5.46813e-12	2.09769e-10	16.875
IGFBP4	-2.11011	7.43439	-7.6525	5.54111e-12	2.12283e-10	16.8621
TTC7B	0.520741	3.11298	7.65188	5.55923e-12	2.12639e-10	16.8589
USP51	2.04136	3.15493	7.65167	5.56532e-12	2.12639e-10	16.8578
ZSWIM5	0.500345	3.36855	7.65082	5.59003e-12	2.13297e-10	16.8535
PACSIN2	1.16961	6.12803	7.64697	5.70347e-12	2.17334e-10	16.8339
KIF7	1.26145	3.93771	7.64462	5.77416e-12	2.19734e-10	16.8218
WHSC1L1	1.09695	3.45313	7.64364	5.80358e-12	2.20559e-10	16.8169
CST9L	1.28592	2.94471	7.64327	5.81486e-12	2.20694e-10	16.815
LAMB4	0.966427	2.97951	7.64298	5.82382e-12	2.2074e-10	16.8135
FERMT3	-1.53034	5.62343	-7.63824	5.96962e-12	2.25966e-10	16.7893
PDE3A	0.337448	2.99144	7.63784	5.98204e-12	2.26135e-10	16.7873
FGF14	1.52003	3.11016	7.63525	6.06353e-12	2.28912e-10	16.7741
ADH6	1.17474	3.14072	7.63356	6.11719e-12	2.30633e-10	16.7655
ARSF	1.11083	2.92723	7.63255	6.14957e-12	2.31547e-10	16.7604
GPT	1.25567	3.10418	7.63222	6.16016e-12	2.3164e-10	16.7587
FLJ44076	1.15719	3.00071	7.6315	6.18338e-12	2.32207e-10	16.755
UNC13C	0.911794	3.20853	7.63061	6.21223e-12	2.32983e-10	16.7505
GABRA4	0.896418	2.91429	7.62885	6.26932e-12	2.34815e-10	16.7415
EFCBP1	0.301733	2.81475	7.62746	6.31497e-12	2.36066e-10	16.7345
LDOC1	1.63292	4.70082	7.62733	6.31928e-12	2.36066e-10	16.7338
KLF16	0.770128	2.92179	7.62637	6.3512e-12	2.36948e-10	16.7289
CHD7	-1.04365	4.26737	-7.62599	6.36388e-12	2.37111e-10	16.7269
TNFRSF4	-1.06693	4.2559	-7.62452	6.4127e-12	2.38618e-10	16.7195
PIGH	1.03136	4.06527	7.62376	6.43819e-12	2.39254e-10	16.7156
LOC651919	2.57796	3.64123	7.6224	6.48409e-12	2.40646e-10	16.7087
OR6B2	0.77644	2.85234	7.6199	6.56926e-12	2.4349e-10	16.6959
C1ORF92	0.736665	3.03226	7.6185	6.61736e-12	2.44954e-10	16.6888
LOC652844	1.55538	3.31532	7.61788	6.6388e-12	2.45429e-10	16.6856
SHCBP1	-2.67258	9.53418	-7.61672	6.67911e-12	2.46599e-10	16.6797
MPP4	1.22212	2.96712	7.61548	6.7225e-12	2.4788e-10	16.6734
C14ORF132	1.47288	4.76327	7.61364	6.78737e-12	2.49416e-10	16.664
VAMP4	1.19586	4.50096	7.61338	6.79633e-12	2.49416e-10	16.6627
OR5H1	0.774213	2.86027	7.61333	6.79822e-12	2.49416e-10	16.6625
UBTD1	1.40863	4.28178	7.61312	6.80555e-12	2.49416e-10	16.6614
BHLHB9	0.695965	3.45339	7.61306	6.80791e-12	2.49416e-10	16.6611
THRB	1.97617	3.19345	7.6127	6.82068e-12	2.49563e-10	16.6593
TMEM189	1.43002	4.94252	7.61088	6.88561e-12	2.5153e-10	16.65
HDAC11	0.930743	3.46116	7.6107	6.89209e-12	2.5153e-10	16.6491
C1ORF175	0.693765	3.46817	7.60992	6.92011e-12	2.5223e-10	16.6451
CCDC86	1.06621	4.52997	7.6059	7.06684e-12	2.57249e-10	16.6247
NPY2R	1.2995	2.96563	7.60565	7.07605e-12	2.57256e-10	16.6234
OMP	0.7445	2.7993	7.60463	7.11382e-12	2.58299e-10	16.6182
PDHX	1.86319	4.43528	7.60412	7.13265e-12	2.58654e-10	16.6156
C1ORF227	1.75411	3.05419	7.60341	7.15901e-12	2.5928e-10	16.612
OR4P4	1.06557	2.94944	7.60266	7.18693e-12	2.59961e-10	16.6082
KRTAP5-3	0.858877	2.9059	7.6017	7.2232e-12	2.60942e-10	16.6033
IGSF5	0.47159	2.86836	7.60139	7.23474e-12	2.61028e-10	16.6017
FBXW9	1.18358	3.81114	7.6007	7.26079e-12	2.61402e-10	16.5982
LOC91561	-2.62403	9.82309	-7.60063	7.26345e-12	2.61402e-10	16.5979
TMC5	0.901171	2.98735	7.59967	7.30007e-12	2.62388e-10	16.593
TMEM161A	1.02843	3.25212	7.5986	7.34073e-12	2.63518e-10	16.5875
FOXR2	0.494685	2.81455	7.59752	7.38221e-12	2.64673e-10	16.582
LGR6	1.01827	3.45133	7.59683	7.40897e-12	2.65299e-10	16.5785
HIST1H2BF	1.624	3.02986	7.59569	7.45303e-12	2.66542e-10	16.5727
FUBP1	0.831527	3.2287	7.59393	7.52162e-12	2.68658e-10	16.5638
FAM76A	0.72149	3.17884	7.59012	7.67231e-12	2.73697e-10	16.5444
LNPEP	1.01373	3.81439	7.58955	7.69538e-12	2.74177e-10	16.5415
MYO9A	1.02344	4.40125	7.58764	7.77223e-12	2.76569e-10	16.5318
FAM55A	0.800808	2.85691	7.58576	7.8487e-12	2.78942e-10	16.5222
HMGB4	0.618168	2.86508	7.58252	7.98231e-12	2.83337e-10	16.5058
OSBPL1A	1.55628	5.2791	7.57879	8.13902e-12	2.8854e-10	16.4868
FOXN4	0.566542	2.85103	7.578	8.17236e-12	2.89362e-10	16.4828
ABCA5	1.31415	3.2889	7.57699	8.21557e-12	2.90531e-10	16.4776
FBXO30	1.66714	4.42616	7.57647	8.23785e-12	2.90958e-10	16.475
BEST3	1.21195	2.93593	7.5748	8.30991e-12	2.9314e-10	16.4665
TMED8	0.969442	2.99641	7.574	8.34455e-12	2.93998e-10	16.4624
OR2T27	0.83583	2.88199	7.57121	8.46649e-12	2.97926e-10	16.4483
C2ORF83	0.773187	2.89981	7.56979	8.52938e-12	2.99769e-10	16.4411
LOC55908	1.39606	3.42934	7.56868	8.5787e-12	3.01132e-10	16.4354
SERPINB4	0.716613	2.84855	7.56819	8.60064e-12	3.0153e-10	16.4329
GATA4	0.965659	2.91769	7.56715	8.64733e-12	3.02795e-10	16.4277
CDC42EP3	0.754502	3.26247	7.5653	8.73098e-12	3.05349e-10	16.4183
RUNX3	-1.61549	5.11126	-7.56442	8.77106e-12	3.06374e-10	16.4138
PCDHGB3	0.770104	2.87729	7.56257	8.85574e-12	3.08929e-10	16.4044
IL10RA	-1.39599	4.89288	-7.56235	8.86588e-12	3.08929e-10	16.4033
KRT82	1.07528	2.90323	7.56211	8.87735e-12	3.08951e-10	16.402
SAMSN1	-1.25175	4.34641	-7.56167	8.89734e-12	3.09269e-10	16.3998
STARD5	-0.986393	4.18128	-7.56028	8.96205e-12	3.11139e-10	16.3928
OSM	-1.27084	4.23751	-7.55917	9.01407e-12	3.12016e-10	16.3871
IMPDH1	-1.16093	5.23241	-7.55911	9.01666e-12	3.12016e-10	16.3868
PDE8B	1.39863	3.70463	7.55904	9.02013e-12	3.12016e-10	16.3865
KIR3DX1	0.755426	2.89478	7.55832	9.05398e-12	3.12807e-10	16.3828
TECPR2	0.436942	2.93759	7.55763	9.08666e-12	3.13556e-10	16.3793
C12ORF61	0.98543	2.94348	7.55711	9.11128e-12	3.13696e-10	16.3767
ZNF574	2.56116	3.49966	7.55708	9.11273e-12	3.13696e-10	16.3765
OR8B4	0.893474	2.95109	7.55567	9.17989e-12	3.15626e-10	16.3693
GJC2	2.17078	4.25398	7.55386	9.26636e-12	3.18216e-10	16.3602
TMCC2	1.33797	3.0772	7.5534	9.28866e-12	3.18545e-10	16.3578
NECAB2	1.52376	3.1656	7.5532	9.2983e-12	3.18545e-10	16.3568
PRKG1	0.430002	3.27934	7.55185	9.36369e-12	3.20165e-10	16.35
C15ORF60	0.961501	2.95988	7.55177	9.36805e-12	3.20165e-10	16.3495
TDH	1.41401	2.96076	7.55138	9.38686e-12	3.20205e-10	16.3476
C17ORF42	1.60262	3.02823	7.55128	9.39168e-12	3.20205e-10	16.3471
LOC644677	2.59135	3.54555	7.55072	9.4191e-12	3.20756e-10	16.3442
SLC1A1	1.2419	3.1696	7.55041	9.43456e-12	3.20775e-10	16.3426
TNFSF14	-1.71292	6.96559	-7.55025	9.44217e-12	3.20775e-10	16.3418
RIC3	1.62436	3.35469	7.54921	9.49318e-12	3.21401e-10	16.3366
MEGF8	1.38275	3.5136	7.54921	9.49347e-12	3.21401e-10	16.3365
MTP18	-1.14176	4.60436	-7.54919	9.49443e-12	3.21401e-10	16.3364
KRBA2	2.36703	3.25775	7.54556	9.67536e-12	3.27138e-10	16.318
RAB5C	1.51362	5.13497	7.545	9.70368e-12	3.27706e-10	16.3152
EFCAB4A	-0.831897	4.14371	-7.54374	9.76708e-12	3.29457e-10	16.3088
PLA2G3	1.45223	2.99522	7.54283	9.81367e-12	3.30637e-10	16.3042
KIAA1919	2.10684	3.12576	7.54088	9.91378e-12	3.33616e-10	16.2943
C1ORF118	0.985604	2.94676	7.54042	9.93714e-12	3.34008e-10	16.292
NPFFR1	2.15684	3.11384	7.54014	9.95195e-12	3.34111e-10	16.2905
STS	0.374009	3.10179	7.53669	1.01322e-11	3.39401e-10	16.273
LYG2	0.725548	2.88897	7.53666	1.01333e-11	3.39401e-10	16.2729
EGR3	-1.56167	4.45733	-7.53423	1.02625e-11	3.43325e-10	16.2605
FLJ27354	1.5754	3.40445	7.53375	1.02879e-11	3.43513e-10	16.2581
ITLN2	0.955752	3.01567	7.53323	1.03156e-11	3.43513e-10	16.2555
C9	1.12776	2.91921	7.53316	1.03193e-11	3.43513e-10	16.2551
RPLP2	-2.81394	9.95666	-7.53302	1.0327e-11	3.43513e-10	16.2544
GTSE1	1.05729	3.20841	7.533	1.03284e-11	3.43513e-10	16.2543
LOC728758	2.50469	3.6732	7.53253	1.03536e-11	3.43951e-10	16.2519
DEF6	-1.2187	4.6526	-7.53224	1.03692e-11	3.44067e-10	16.2504
TFAMP1	1.17287	2.93477	7.53155	1.04065e-11	3.44903e-10	16.2469
TRIM69	-0.332127	3.29406	-7.53065	1.0455e-11	3.46108e-10	16.2424
FAM181A	0.970523	2.90551	7.5295	1.05176e-11	3.47775e-10	16.2366
SLCO1B3	1.34778	2.94181	7.52609	1.07057e-11	3.53573e-10	16.2193
THAP1	1.00253	3.812	7.52588	1.07177e-11	3.53573e-10	16.2182
SVOPL	0.626864	2.83037	7.52458	1.07903e-11	3.55523e-10	16.2116
SCGB2A1	1.59978	2.98662	7.52416	1.08134e-11	3.55523e-10	16.2095
HBS1L	1.09496	3.30612	7.52388	1.08295e-11	3.55523e-10	16.2081
ATP10D	0.433834	2.99204	7.52384	1.08316e-11	3.55523e-10	16.2079
HIC2	-0.624915	3.88339	-7.52371	1.08392e-11	3.55523e-10	16.2072
DENND3	-0.967526	4.37603	-7.52176	1.09492e-11	3.58718e-10	16.1973
TM4SF4	0.718983	2.91483	7.52128	1.09764e-11	3.59196e-10	16.1949
DLX6	1.29094	2.93834	7.51871	1.1124e-11	3.6361e-10	16.1819
AGPAT6	-0.501922	3.51491	-7.51804	1.11627e-11	3.64271e-10	16.1785
MIER3	0.770066	3.00178	7.51773	1.11811e-11	3.64271e-10	16.1769
FLJ44653	1.22592	2.96578	7.51751	1.11938e-11	3.64271e-10	16.1758
C10ORF71	0.90748	2.94562	7.51748	1.11954e-11	3.64271e-10	16.1756
DHTKD1	1.87164	3.73835	7.51551	1.13109e-11	3.67297e-10	16.1656
THNSL1	1.48614	3.5768	7.51545	1.13141e-11	3.67297e-10	16.1653
BCL3	-1.26848	5.27467	-7.51253	1.14872e-11	3.72492e-10	16.1505
EEF1A1	-2.77797	10.0453	-7.5122	1.15065e-11	3.72694e-10	16.1489
LZTFL1	1.23078	3.85596	7.51046	1.1611e-11	3.75652e-10	16.1401
NPTX1	2.48707	3.66312	7.50914	1.1691e-11	3.77811e-10	16.1334
LIN28	0.688074	2.8432	7.50859	1.17241e-11	3.78451e-10	16.1306
TMEM49	-1.7383	6.43522	-7.50829	1.17429e-11	3.78575e-10	16.129
OR5K2	1.50838	3.11643	7.5081	1.17545e-11	3.78575e-10	16.1281
CAPS2	1.37488	2.96788	7.50633	1.18627e-11	3.81627e-10	16.1191
CDAN1	-2.52285	9.40269	-7.50605	1.18798e-11	3.81748e-10	16.1177
CTF1	2.27684	3.66406	7.504	1.20071e-11	3.85403e-10	16.1073
GCNT3	2.07128	3.13609	7.50369	1.20264e-11	3.85531e-10	16.1058
SRL	1.60586	3.65441	7.5035	1.20381e-11	3.85531e-10	16.1048
CDX4	1.2083	2.94757	7.50245	1.21043e-11	3.86942e-10	16.0995
CLDN17	2.10711	3.12907	7.50237	1.21093e-11	3.86942e-10	16.0991
SIRT4	0.684276	3.12564	7.50208	1.21277e-11	3.87095e-10	16.0976
ZNF391	0.807049	2.88551	7.50085	1.2205e-11	3.89126e-10	16.0914
C5ORF48	0.908734	2.87144	7.50023	1.22444e-11	3.89946e-10	16.0882
OR13J1	2.74134	3.2352	7.4995	1.22907e-11	3.90985e-10	16.0845
DGKK	0.750788	2.82154	7.49533	1.25597e-11	3.99097e-10	16.0634
MDS1	1.03846	3.12785	7.4934	1.26861e-11	4.02665e-10	16.0537
CHRNG	1.39383	2.99025	7.49224	1.27624e-11	4.04635e-10	16.0478
SLC7A11	0.536999	2.84192	7.4917	1.27982e-11	4.0532e-10	16.0451
DEGS2	2.08859	3.12293	7.49025	1.2895e-11	4.07932e-10	16.0377
ADSL	1.67532	6.23828	7.48906	1.2975e-11	4.09633e-10	16.0317
C4ORF21	1.49726	2.99897	7.48902	1.29775e-11	4.09633e-10	16.0315
OR13F1	0.658669	2.81517	7.48691	1.31202e-11	4.13679e-10	16.0208
UGT3A2	0.609996	2.84446	7.48525	1.32337e-11	4.16797e-10	16.0124
CYP7A1	1.3826	2.96455	7.48487	1.32604e-11	4.17175e-10	16.0105
ARS2	-1.5873	6.77764	-7.48379	1.33349e-11	4.19057e-10	16.005
GALP	2.01427	3.08298	7.48237	1.34329e-11	4.21415e-10	15.9978
SLC5A7	1.0582	2.88256	7.48228	1.34395e-11	4.21415e-10	15.9974
PRDM12	1.19049	2.93582	7.48019	1.3586e-11	4.25539e-10	15.9868
CXORF1	1.45678	3.07443	7.47963	1.36253e-11	4.26136e-10	15.984
CXORF41	1.85538	3.04769	7.47949	1.36351e-11	4.26136e-10	15.9833
SEL1L2	2.04714	3.57416	7.47928	1.36499e-11	4.26136e-10	15.9822
REST	1.64079	3.25051	7.47877	1.3686e-11	4.26417e-10	15.9796
FXYD5	-1.89096	7.27654	-7.47873	1.36888e-11	4.26417e-10	15.9794
RHD	1.20381	2.95574	7.4784	1.37124e-11	4.26685e-10	15.9777
ZP2	1.22255	2.9378	7.47807	1.37363e-11	4.26964e-10	15.976
FNDC8	0.966194	2.97871	7.47784	1.37526e-11	4.27004e-10	15.9749
FZR1	1.19652	3.3398	7.47739	1.37846e-11	4.27532e-10	15.9726
CCDC67	1.62176	3.05447	7.47471	1.39772e-11	4.33034e-10	15.9591
TBC1D17	0.91959	3.50125	7.47358	1.40598e-11	4.35122e-10	15.9533
C10ORF46	0.795941	2.98547	7.47333	1.40775e-11	4.35197e-10	15.9521
ZNRF2	0.899038	3.11863	7.47233	1.41506e-11	4.36982e-10	15.9471
FAM19A1	2.42561	3.15633	7.46811	1.44642e-11	4.46183e-10	15.9257
PBX1	0.55733	3.37695	7.4652	1.46837e-11	4.52465e-10	15.911
MS4A8B	0.680524	2.86379	7.4643	1.47523e-11	4.53767e-10	15.9064
LOC654342	2.16045	3.62699	7.46397	1.47776e-11	4.53767e-10	15.9048
KIAA0100	1.83802	3.98812	7.46381	1.47896e-11	4.53767e-10	15.904
SRCRB4D	1.0361	3.10992	7.46381	1.47896e-11	4.53767e-10	15.904
TPT1	-2.79417	10.0203	-7.46339	1.48219e-11	4.54267e-10	15.9018
GPR120	1.30042	3.00332	7.4631	1.48441e-11	4.54459e-10	15.9004
OR56A1	1.00092	2.85553	7.46237	1.49002e-11	4.55688e-10	15.8967
SCGN	0.413069	2.8215	7.4609	1.50144e-11	4.58689e-10	15.8892
OR2F1	1.53778	2.99193	7.46058	1.50391e-11	4.5895e-10	15.8876
LOC442245	1.44781	3.12555	7.45949	1.51248e-11	4.61073e-10	15.8821
CRISP3	1.10723	2.90665	7.45918	1.51487e-11	4.61306e-10	15.8806
SLC22A16	0.561486	3.02182	7.45762	1.52719e-11	4.64561e-10	15.8727
NEK9	2.23226	3.16521	7.45696	1.53244e-11	4.65664e-10	15.8693
DMRTC2	0.807475	2.88122	7.4566	1.53528e-11	4.66029e-10	15.8675
LOC642113	-3.83469	7.71484	-7.45578	1.5418e-11	4.6751e-10	15.8634
APOOL	0.296824	3.27683	7.45551	1.54398e-11	4.67673e-10	15.862
CALB1	2.15494	3.09871	7.4538	1.55766e-11	4.71315e-10	15.8534
GPRC5B	-0.265166	3.29064	-7.45328	1.56193e-11	4.71791e-10	15.8507
SOSTDC1	0.619947	3.02196	7.4532	1.56254e-11	4.71791e-10	15.8503
C14ORF177	0.982697	2.9469	7.45221	1.57061e-11	4.73725e-10	15.8453
OLFM3	0.75364	2.84712	7.45059	1.58378e-11	4.77195e-10	15.8372
LIMD1	1.07503	2.91994	7.45003	1.5884e-11	4.77647e-10	15.8343
ANO9	-0.403517	3.40311	-7.44983	1.59009e-11	4.77647e-10	15.8333
C10ORF62	0.716603	2.85095	7.44969	1.59124e-11	4.77647e-10	15.8326
HDLBP	1.50086	3.30057	7.44959	1.59199e-11	4.77647e-10	15.8321
AQP11	1.96775	3.36079	7.44902	1.59676e-11	4.78575e-10	15.8292
NHLH1	1.0741	2.99575	7.4473	1.61104e-11	4.82347e-10	15.8205
KCNJ11	0.707229	2.81365	7.44638	1.61869e-11	4.8413e-10	15.8159
OR2H1	0.49284	2.79437	7.44553	1.62587e-11	4.85767e-10	15.8116
DBX1	1.04958	2.95275	7.44457	1.63395e-11	4.87669e-10	15.8067
PNPT1	-2.51806	9.32825	-7.44306	1.64681e-11	4.90995e-10	15.7991
TMEM80	1.47579	4.18371	7.4424	1.65239e-11	4.92144e-10	15.7958
AVPR1A	0.438061	2.77303	7.44173	1.65817e-11	4.93045e-10	15.7924
ABCA12	1.15756	2.99505	7.44165	1.65888e-11	4.93045e-10	15.792
SUSD4	2.55381	3.25872	7.43997	1.67328e-11	4.96808e-10	15.7835
RQCD1	1.22794	3.93909	7.4387	1.68434e-11	4.9957e-10	15.7771
POU5F2	0.989394	2.9125	7.43815	1.68919e-11	5.00488e-10	15.7743
PAQR7	0.749243	3.84576	7.43587	1.70918e-11	5.05887e-10	15.7628
KCNK10	0.576787	3.08482	7.43565	1.71119e-11	5.05955e-10	15.7617
C9ORF71	1.67991	3.05849	7.43488	1.71802e-11	5.07415e-10	15.7578
PNPO	1.58855	5.08442	7.43469	1.71969e-11	5.07415e-10	15.7568
SPATA1	1.38604	2.99888	7.43304	1.73443e-11	5.11236e-10	15.7485
TSFM	1.36499	3.87079	7.43215	1.74244e-11	5.1266e-10	15.744
ELOVL2	0.783146	3.12161	7.4321	1.74286e-11	5.1266e-10	15.7438
FSHR	1.19443	2.93021	7.43124	1.75069e-11	5.14431e-10	15.7394
EPB49	0.541644	3.36628	7.43085	1.75416e-11	5.14576e-10	15.7375
LOC123876	1.42109	3.00968	7.43077	1.75495e-11	5.14576e-10	15.737
UBTD2	0.979086	3.70226	7.43042	1.75808e-11	5.14576e-10	15.7353
POLR2J	1.00337	3.38659	7.43039	1.7584e-11	5.14576e-10	15.7351
LOC440570	1.62169	3.06975	7.42834	1.77716e-11	5.19133e-10	15.7248
UPK3A	0.71503	3.00269	7.42829	1.77762e-11	5.19133e-10	15.7245
NKX2-8	1.21012	3.11025	7.42655	1.79362e-11	5.2327e-10	15.7158
PISD	1.19543	4.50081	7.42408	1.81676e-11	5.29206e-10	15.7033
ESCO2	1.53683	3.01409	7.42398	1.81768e-11	5.29206e-10	15.7028
HS.10862	1.39372	5.25533	7.42343	1.8228e-11	5.30157e-10	15.7
ESRRA	1.31178	3.99159	7.42303	1.82659e-11	5.30716e-10	15.698
SLC6A14	1.73596	3.06585	7.42253	1.83136e-11	5.30955e-10	15.6955
HS.157344	-1.47547	4.40234	-7.42249	1.83173e-11	5.30955e-10	15.6953
MLNR	2.38039	3.20921	7.42217	1.83479e-11	5.30955e-10	15.6936
FARSB	1.44363	3.10169	7.42216	1.83486e-11	5.30955e-10	15.6936
ADORA2A	-0.531268	3.67682	-7.42174	1.83885e-11	5.31569e-10	15.6915
OR8K1	1.69325	3.01676	7.42126	1.84342e-11	5.3198e-10	15.6891
PIP	0.714465	2.98236	7.42106	1.8453e-11	5.3198e-10	15.6881
DEFB137	2.16276	3.13167	7.421	1.84587e-11	5.3198e-10	15.6878
C22ORF31	1.97656	3.11523	7.42015	1.85403e-11	5.33791e-10	15.6835
SYNGR4	2.70264	3.22746	7.41914	1.86375e-11	5.3605e-10	15.6784
LOC150223	0.764266	3.1841	7.41874	1.86761e-11	5.36617e-10	15.6763
GPR78	2.49744	3.34258	7.41839	1.87098e-11	5.37045e-10	15.6746
PRCC	-0.635021	4.12214	-7.41725	1.88208e-11	5.39687e-10	15.6688
OR52E4	1.69103	3.02073	7.4168	1.88645e-11	5.40398e-10	15.6665
C14ORF183	1.61931	2.99737	7.4151	1.90309e-11	5.44617e-10	15.658
AMTN	0.986017	2.93166	7.41426	1.91135e-11	5.46432e-10	15.6538
LOC642293	0.786806	2.85896	7.41395	1.91438e-11	5.46749e-10	15.6522
ADPGK	-1.22605	5.05118	-7.41362	1.91764e-11	5.47133e-10	15.6505
ZDHHC18	-0.685011	3.8792	-7.41246	1.92927e-11	5.49778e-10	15.6447
PLAU	-1.95143	5.91432	-7.4123	1.93077e-11	5.49778e-10	15.6439
FKBP6	1.29947	2.98896	7.40905	1.96354e-11	5.57846e-10	15.6275
ATPAF1	1.19166	4.91481	7.40879	1.96613e-11	5.57846e-10	15.6262
LOC441070	0.99477	3.07229	7.40877	1.96636e-11	5.57846e-10	15.6261
RPGRIP1L	0.90552	2.96463	7.40861	1.96799e-11	5.57846e-10	15.6253
OR51B2	1.66069	3.02917	7.40852	1.96889e-11	5.57846e-10	15.6248
LOH12CR1	2.21038	3.44652	7.40805	1.97372e-11	5.58166e-10	15.6224
ADAL	0.883388	3.51492	7.40803	1.97394e-11	5.58166e-10	15.6223
DACT2	1.16625	3.14305	7.40639	1.99068e-11	5.62343e-10	15.6141
PTCD3	2.09013	3.30346	7.40578	1.99696e-11	5.62986e-10	15.611
SLC30A8	1.68661	3.05586	7.40573	1.99754e-11	5.62986e-10	15.6107
AGR2	1.14023	3.21512	7.4056	1.99888e-11	5.62986e-10	15.6101
ACADL	0.84505	3.43324	7.40335	2.02223e-11	5.68999e-10	15.5987
HEXA	0.425649	3.30514	7.40218	2.03452e-11	5.71894e-10	15.5928
OR10A4	2.65954	3.22863	7.39824	2.07632e-11	5.83066e-10	15.573
AKR1D1	-2.66296	9.65518	-7.39626	2.09772e-11	5.87996e-10	15.563
LOC653308	0.386531	3.26158	7.3962	2.09835e-11	5.87996e-10	15.5627
FLJ35409	0.719277	2.8943	7.39583	2.10236e-11	5.87996e-10	15.5608
FLJ40244	2.35634	3.12601	7.39578	2.10294e-11	5.87996e-10	15.5606
AKT2	1.32326	3.04152	7.39566	2.10419e-11	5.87996e-10	15.56
C1QL4	1.08141	2.94519	7.39496	2.11182e-11	5.8955e-10	15.5565
HS.570636	-0.312382	3.26871	-7.39309	2.1323e-11	5.94685e-10	15.547
CHRNB2	1.09866	2.98143	7.39287	2.13475e-11	5.94788e-10	15.5459
TCHHL1	1.99198	3.05438	7.39232	2.14084e-11	5.95901e-10	15.5431
NANOG	1.4092	3.00997	7.39185	2.14596e-11	5.96745e-10	15.5408
C3ORF48	1.97737	3.10416	7.39161	2.1487e-11	5.96923e-10	15.5396
DIRAS1	1.25133	3.10756	7.38964	2.1707e-11	6.02258e-10	15.5296
HSD17B2	1.63766	3.01581	7.38936	2.17376e-11	6.02258e-10	15.5283
C3ORF67	2.466	3.35423	7.38932	2.17424e-11	6.02258e-10	15.528
SIX3	2.40456	3.24252	7.38796	2.1896e-11	6.05923e-10	15.5212
ARL10	0.789307	2.93054	7.38765	2.19306e-11	6.06292e-10	15.5196
TUBA3C	0.314296	2.81193	7.38561	2.21634e-11	6.12136e-10	15.5093
C1ORF140	2.41582	3.24011	7.3852	2.22102e-11	6.12835e-10	15.5073
UPB1	0.90268	3.00212	7.38476	2.22609e-11	6.13639e-10	15.5051
C1ORF14	2.31416	3.13189	7.38443	2.2298e-11	6.14067e-10	15.5034
P2RX5	1.00894	3.0597	7.38216	2.25608e-11	6.20706e-10	15.492
MGC27121	0.595952	2.84519	7.38191	2.25907e-11	6.20929e-10	15.4907
HS.535028	-1.65707	5.81281	-7.38164	2.2622e-11	6.2097e-10	15.4894
HRNR	1.16514	2.96092	7.38151	2.26367e-11	6.2097e-10	15.4887
PLAC1	0.495758	2.97542	7.38129	2.26624e-11	6.2097e-10	15.4876
ASPN	2.63279	3.21173	7.38095	2.27025e-11	6.2097e-10	15.4859
C10ORF25	0.495691	2.95153	7.38085	2.27143e-11	6.2097e-10	15.4854
ATXN7L1	0.245544	2.82409	7.38069	2.27331e-11	6.2097e-10	15.4846
LOC90624	1.80911	3.66047	7.38042	2.27643e-11	6.2097e-10	15.4832
SLC6A12	1.0548	3.4227	7.38041	2.27665e-11	6.2097e-10	15.4832
UBQLN4	1.01685	5.7153	7.37999	2.28151e-11	6.217e-10	15.4811
CXCR4	-2.16205	5.47653	-7.37884	2.29514e-11	6.24819e-10	15.4753
ZNF646	1.37004	3.34389	7.37793	2.30595e-11	6.27162e-10	15.4707
IL26	1.83788	3.08075	7.3729	2.36653e-11	6.43024e-10	15.4454
FGF19	1.35297	3.13104	7.3726	2.37025e-11	6.43092e-10	15.4439
C6ORF57	0.53667	3.3389	7.37251	2.37129e-11	6.43092e-10	15.4434
PHF2	1.17988	4.55422	7.37223	2.37482e-11	6.43436e-10	15.442
RNF190	2.62443	3.21239	7.37038	2.39753e-11	6.48972e-10	15.4327
FAM92A1	1.06396	3.45008	7.36981	2.40459e-11	6.4979e-10	15.4298
MRPL47	0.859395	3.7593	7.36977	2.40511e-11	6.4979e-10	15.4296
PDE5A	1.97254	6.082	7.36937	2.41001e-11	6.50497e-10	15.4276
ULK3	-0.361506	3.51233	-7.3682	2.42471e-11	6.53847e-10	15.4217
KRTAP5-6	1.79543	3.05285	7.36677	2.44262e-11	6.58052e-10	15.4145
RRP1B	1.52454	3.68036	7.36643	2.44693e-11	6.58423e-10	15.4128
TERT	0.964268	2.95924	7.36629	2.44862e-11	6.58423e-10	15.4121
TMEM120B	1.66474	3.08158	7.36607	2.45149e-11	6.58576e-10	15.411
SPAG5	-0.219731	3.09396	-7.36577	2.45528e-11	6.58973e-10	15.4095
CCDC114	1.45294	2.97923	7.36475	2.46823e-11	6.61824e-10	15.4043
PDZK3	2.06371	3.11863	7.36108	2.5154e-11	6.72896e-10	15.3859
ADAM20	0.531942	2.79903	7.361	2.51644e-11	6.72896e-10	15.3855
DAAM1	1.64966	5.35146	7.36098	2.5166e-11	6.72896e-10	15.3854
LOC492303	0.65347	2.82656	7.36032	2.52521e-11	6.74564e-10	15.3821
PCDH7	0.934557	3.74785	7.36008	2.52839e-11	6.74782e-10	15.3809
PREP	1.59751	4.45045	7.35916	2.54041e-11	6.77355e-10	15.3762
HYI	0.476103	3.50508	7.35798	2.55595e-11	6.80449e-10	15.3703
LYSMD3	0.914463	3.37326	7.35791	2.55679e-11	6.80449e-10	15.37
HS.545045	1.59594	3.26621	7.35669	2.57291e-11	6.841e-10	15.3638
LGALS4	2.21031	3.30997	7.35619	2.57965e-11	6.85255e-10	15.3613
RNASET2	-2.17543	7.80709	-7.35551	2.58871e-11	6.8702e-10	15.3579
C2ORF34	0.507784	3.61342	7.35512	2.59385e-11	6.87159e-10	15.3559
GJA9	2.23125	3.11769	7.35511	2.59405e-11	6.87159e-10	15.3558
GPR115	2.69284	3.19856	7.35316	2.62019e-11	6.93438e-10	15.3461
LOC641699	1.1151	3.05774	7.35286	2.62426e-11	6.9387e-10	15.3446
C5ORF33	2.14718	3.73292	7.35256	2.62828e-11	6.94289e-10	15.3431
NHLRC2	0.790902	3.41502	7.35056	2.65554e-11	7.00842e-10	15.333
TSPAN16	1.16355	2.95136	7.34968	2.66769e-11	7.03397e-10	15.3285
LOC654069	2.09109	3.6204	7.34924	2.67367e-11	7.04321e-10	15.3264
BPIL2	1.66927	3.07661	7.34877	2.68013e-11	7.04964e-10	15.324
ZP1	1.46205	3.00043	7.34866	2.68171e-11	7.04964e-10	15.3234
C19ORF35	1.0494	3.00872	7.3484	2.68526e-11	7.04964e-10	15.3221
C5ORF46	1.77376	4.78548	7.34835	2.686e-11	7.04964e-10	15.3219
ABLIM2	0.80228	3.82462	7.34746	2.69831e-11	7.07543e-10	15.3174
HRH2	0.807522	2.91695	7.34692	2.70583e-11	7.08834e-10	15.3147
TAS2R50	1.12303	2.92816	7.34675	2.70821e-11	7.08834e-10	15.3138
HS.552282	2.43649	3.87904	7.34619	2.71612e-11	7.10253e-10	15.311
RAB39B	1.56401	3.02453	7.34563	2.72388e-11	7.11062e-10	15.3082
SIGLEC16	1.07024	3.26401	7.34561	2.7242e-11	7.11062e-10	15.3081
DHRSX	0.786136	3.38664	7.34513	2.73092e-11	7.12164e-10	15.3057
PRR18	0.619732	2.96798	7.34418	2.7443e-11	7.14998e-10	15.3009
ARMC8	1.62755	3.88711	7.34343	2.75496e-11	7.16641e-10	15.2972
CNTF	0.845906	2.89974	7.34338	2.75564e-11	7.16641e-10	15.2969
RNASE11	1.21528	3.05004	7.34286	2.76304e-11	7.17913e-10	15.2943
IRF3	-0.921136	4.83329	-7.34248	2.76845e-11	7.18635e-10	15.2924
PTCH1	1.56615	3.27187	7.34216	2.773e-11	7.18635e-10	15.2908
GDF3	1.35089	3.04753	7.34214	2.77339e-11	7.18635e-10	15.2907
LBXCOR1	0.718595	2.90349	7.3418	2.77822e-11	7.19233e-10	15.289
MAGEB10	1.20377	2.96695	7.34147	2.78289e-11	7.19789e-10	15.2873
C9ORF79	0.802284	3.05685	7.33979	2.8072e-11	7.25417e-10	15.2788
PPCDC	1.00517	2.96878	7.33955	2.81066e-11	7.25654e-10	15.2776
ACAP1	-1.35059	4.47419	-7.33908	2.81737e-11	7.26729e-10	15.2753
ACCSL	0.811296	2.97407	7.33883	2.82103e-11	7.27015e-10	15.274
KLHDC1	1.35472	3.34224	7.33849	2.82603e-11	7.27213e-10	15.2723
GOSR1	2.38813	3.71975	7.33843	2.8269e-11	7.27213e-10	15.272
YKT6	1.13981	3.23166	7.33796	2.83376e-11	7.28321e-10	15.2696
ISCA1L	1.00667	4.17903	7.3376	2.83891e-11	7.28987e-10	15.2679
FLJ25996	1.01735	3.0231	7.33699	2.8479e-11	7.30636e-10	15.2648
XKRY	1.07973	2.93972	7.33616	2.86015e-11	7.32961e-10	15.2606
SIGMAR1	0.894721	4.61765	7.33599	2.86266e-11	7.32961e-10	15.2598
PDE4C	-2.41204	9.35846	-7.33585	2.86468e-11	7.32961e-10	15.2591
ERC2	0.839737	2.9012	7.33491	2.87863e-11	7.35871e-10	15.2543
IFIT1L	1.41388	3.0268	7.33466	2.88231e-11	7.36151e-10	15.2531
GAGE2C	0.651407	2.86389	7.33327	2.90305e-11	7.40785e-10	15.2461
PINX1	0.712731	3.46568	7.33253	2.91411e-11	7.42943e-10	15.2424
LOC286187	1.4626	2.98905	7.33209	2.92077e-11	7.43974e-10	15.2402
BARX1	0.813616	3.06891	7.33104	2.93659e-11	7.47337e-10	15.2349
TIMP1	-2.26597	9.63985	-7.33078	2.94046e-11	7.47652e-10	15.2336
FOXA1	0.700052	2.88091	7.3297	2.95694e-11	7.51173e-10	15.2282
ACAN	0.555472	2.80835	7.32827	2.97873e-11	7.55764e-10	15.221
OFCC1	0.945514	3.00486	7.32817	2.98031e-11	7.55764e-10	15.2205
LOC642017	-0.459702	3.70329	-7.32744	2.99151e-11	7.57379e-10	15.2168
CKM	1.80845	3.08808	7.32741	2.992e-11	7.57379e-10	15.2167
RPS28	-2.14335	8.34903	-7.32509	3.02792e-11	7.65792e-10	15.205
MBTD1	0.992756	4.59403	7.32364	3.05066e-11	7.70859e-10	15.1977
PSMD9	1.80971	3.67155	7.3227	3.06544e-11	7.73907e-10	15.193
LOC723972	1.82621	3.89468	7.3221	3.07495e-11	7.75623e-10	15.19
SLC2A12	1.99023	3.61314	7.32118	3.08954e-11	7.783e-10	15.1854
SYTL5	1.70363	3.24222	7.32108	3.09103e-11	7.783e-10	15.1849
PKD1L2	0.852329	3.09036	7.32036	3.10263e-11	7.80531e-10	15.1812
CDC73	1.66001	3.23028	7.31964	3.11402e-11	7.82707e-10	15.1777
CD79A	-2.71009	6.09326	-7.31939	3.11801e-11	7.83018e-10	15.1764
PFDN1	1.19079	5.04057	7.31905	3.12358e-11	7.83727e-10	15.1747
PHF10	1.45343	3.96753	7.31841	3.1338e-11	7.85601e-10	15.1715
CLK3	-1.06689	5.47775	-7.31749	3.14876e-11	7.88656e-10	15.1669
TDRD10	-0.39728	3.38623	-7.31698	3.15706e-11	7.90042e-10	15.1643
AFAP1L1	0.745802	3.76267	7.31615	3.17059e-11	7.9273e-10	15.1601
DLEU2L	1.31532	2.98395	7.31479	3.19278e-11	7.9758e-10	15.1533
TIMM50	2.05922	3.10711	7.31446	3.19824e-11	7.98243e-10	15.1516
AKT3	0.825673	3.24258	7.31272	3.22697e-11	8.0471e-10	15.1429
LRRC55	2.37636	3.17474	7.31019	3.26929e-11	8.14549e-10	15.1302
FGFR2	0.492971	2.77389	7.30977	3.27633e-11	8.15546e-10	15.1281
LCN8	2.20136	3.14648	7.30961	3.27901e-11	8.15546e-10	15.1273
LMO7	0.485284	3.10196	7.30867	3.29496e-11	8.18799e-10	15.1226
SGSM1	0.92922	3.84281	7.30817	3.30347e-11	8.20198e-10	15.1201
C17ORF47	1.11015	3.31711	7.30785	3.30882e-11	8.20813e-10	15.1185
MGAT4B	1.99712	4.16476	7.30719	3.32005e-11	8.22883e-10	15.1152
LOC728505	1.32052	3.3555	7.30622	3.33668e-11	8.26285e-10	15.1103
C4ORF6	1.2991	3.04951	7.30529	3.35267e-11	8.29524e-10	15.1057
PNLDC1	0.462512	2.84944	7.30405	3.37423e-11	8.34134e-10	15.0994
CFHR1	1.72705	3.26797	7.30303	3.39194e-11	8.37785e-10	15.0943
LRRC8B	0.876839	2.97282	7.30286	3.39488e-11	8.37786e-10	15.0935
DEAF1	1.09913	4.13681	7.30212	3.40789e-11	8.40268e-10	15.0897
IGFN1	1.01306	2.92685	7.30168	3.41556e-11	8.41432e-10	15.0875
FLJ20674	0.932675	3.3788	7.30035	3.43899e-11	8.4581e-10	15.0809
ZNF660	0.697656	3.18301	7.30033	3.43927e-11	8.4581e-10	15.0808
DEFB118	1.10174	2.96495	7.29978	3.44912e-11	8.47502e-10	15.078
F8A1	-0.699439	4.21596	-7.29958	3.45259e-11	8.47625e-10	15.077
ADAMTS19	2.57727	3.26737	7.29913	3.46067e-11	8.48877e-10	15.0747
HS6ST3	0.496666	2.82112	7.29826	3.47608e-11	8.51925e-10	15.0704
LOC147645	1.40898	3.3885	7.29631	3.51113e-11	8.59774e-10	15.0606
HS.199657	-0.313295	3.35721	-7.29366	3.55938e-11	8.7065e-10	15.0473
DUSP2	-1.20894	4.239	-7.29353	3.56165e-11	8.7065e-10	15.0467
RELB	-0.686335	3.89977	-7.29261	3.57862e-11	8.74048e-10	15.0421
ERG	1.27858	3.33017	7.29221	3.58605e-11	8.75114e-10	15.04
LOC649044	-0.285794	3.3042	-7.2908	3.61204e-11	8.807e-10	15.033
NKX2-5	0.791895	2.83093	7.28988	3.6291e-11	8.84105e-10	15.0284
C7ORF20	0.596164	3.34634	7.28963	3.63384e-11	8.84504e-10	15.0271
PVRL4	0.369351	2.81139	7.28927	3.64066e-11	8.85407e-10	15.0253
CYP3A4	1.15275	2.99754	7.28893	3.64685e-11	8.86158e-10	15.0236
IL4R	-1.37046	5.59886	-7.28842	3.65658e-11	8.86913e-10	15.021
ZDHHC22	1.90234	3.30822	7.28839	3.65701e-11	8.86913e-10	15.0209
OR6C4	1.5536	3.05907	7.28827	3.6593e-11	8.86913e-10	15.0203
LIG1	-0.64374	3.88013	-7.28682	3.68669e-11	8.92792e-10	15.0131
CORO2A	1.32682	3.84342	7.28606	3.70119e-11	8.95542e-10	15.0092
KIAA1529	0.868451	2.90295	7.28556	3.71066e-11	8.97074e-10	15.0067
C11ORF85	0.763392	2.99999	7.28271	3.76542e-11	9.09541e-10	14.9924
TRIM42	0.483023	2.88441	7.28246	3.77029e-11	9.0981e-10	14.9912
ETV5	2.19613	5.23375	7.28224	3.77457e-11	9.0981e-10	14.9901
ZFYVE19	1.84453	4.66132	7.28216	3.77611e-11	9.0981e-10	14.9897
SHANK1	1.59475	3.004	7.28154	3.78807e-11	9.1192e-10	14.9866
RPE65	1.22402	2.91666	7.27983	3.82155e-11	9.19203e-10	14.978
CREM	2.0788	3.27848	7.27872	3.84341e-11	9.23681e-10	14.9725
JUN	-2.11414	7.48895	-7.27777	3.8621e-11	9.27393e-10	14.9677
LOC649447	-1.95256	8.016	-7.27727	3.87208e-11	9.29005e-10	14.9652
DAXX	-0.627803	4.05074	-7.27689	3.87978e-11	9.3007e-10	14.9633
BRCC3	1.77562	3.70963	7.27656	3.88622e-11	9.30832e-10	14.9617
OR52A1	1.04886	2.9059	7.27612	3.89516e-11	9.32189e-10	14.9594
GABPB2	-2.71958	9.79961	-7.2758	3.90139e-11	9.3269e-10	14.9579
PSG9	1.5124	3.02261	7.27568	3.9038e-11	9.3269e-10	14.9573
ARRDC1	0.929221	3.03765	7.27549	3.90774e-11	9.32851e-10	14.9563
HSP90AB2P	0.660646	3.23336	7.27526	3.91223e-11	9.33139e-10	14.9552
NUDT6	1.87988	3.62861	7.27473	3.92291e-11	9.34906e-10	14.9525
SLC22A8	1.58005	3.01696	7.27395	3.93877e-11	9.37901e-10	14.9486
PRR11	1.25546	3.06378	7.27372	3.94347e-11	9.38237e-10	14.9474
FLJ23834	0.436115	2.85161	7.27317	3.95457e-11	9.40093e-10	14.9447
C6ORF208	2.64022	3.38766	7.27293	3.95933e-11	9.40441e-10	14.9435
ZNF691	0.835237	3.40235	7.27241	3.9699e-11	9.42165e-10	14.9409
LOC284998	1.28889	3.25569	7.27171	3.98429e-11	9.44794e-10	14.9374
TULP1	1.11784	2.94545	7.27121	3.99455e-11	9.46012e-10	14.9348
LOC645899	-2.29984	9.52952	-7.27114	3.99607e-11	9.46012e-10	14.9345
CRISPLD2	-2.15528	6.64376	-7.26793	4.06248e-11	9.60937e-10	14.9184
ZNF510	2.39457	3.39719	7.26725	4.07668e-11	9.63495e-10	14.915
KIAA0513	-0.643494	4.00877	-7.26606	4.10163e-11	9.68589e-10	14.9091
ADAM18	1.43926	3.00937	7.26546	4.1143e-11	9.70468e-10	14.906
PLA2G12A	2.48669	3.60247	7.26536	4.11639e-11	9.70468e-10	14.9055
SRY	1.28206	3.09146	7.26518	4.12012e-11	9.70543e-10	14.9047
AKR1C1	0.957199	2.87271	7.26385	4.14831e-11	9.76378e-10	14.898
KLC4	0.57174	3.15217	7.26327	4.16083e-11	9.78515e-10	14.8951
C21ORF62	0.905241	3.00371	7.26265	4.17411e-11	9.8083e-10	14.892
GLP1R	1.92741	3.11124	7.26044	4.22165e-11	9.91184e-10	14.8809
ICAM3	-1.60046	5.73137	-7.25989	4.23362e-11	9.93175e-10	14.8782
ZNF616	1.14342	3.42712	7.25933	4.24566e-11	9.95182e-10	14.8754
PLEKHA8	1.84793	3.25518	7.25889	4.25527e-11	9.96614e-10	14.8732
CPEB3	1.07966	4.182	7.25868	4.25986e-11	9.9687e-10	14.8721
C20ORF197	0.997273	2.96598	7.25832	4.26776e-11	9.979e-10	14.8703
NHEDC2	1.53028	3.44551	7.25716	4.29329e-11	1.00277e-09	14.8645
C21ORF90	0.967358	3.01401	7.25705	4.29563e-11	1.00277e-09	14.864
EML3	-1.32473	6.52514	-7.25658	4.30619e-11	1.00441e-09	14.8616
SCN8A	0.615487	2.80477	7.25446	4.35329e-11	1.01457e-09	14.851
AMDHD2	2.10858	4.23769	7.25426	4.35771e-11	1.01477e-09	14.85
ZNF117	1.17413	2.975	7.25224	4.40311e-11	1.02451e-09	14.8399
ANKFN1	0.587716	2.85874	7.2513	4.42445e-11	1.02782e-09	14.8352
TAS2R31	1.07172	2.94875	7.25113	4.42814e-11	1.02782e-09	14.8344
SLC4A9	0.625529	2.81597	7.25109	4.42901e-11	1.02782e-09	14.8342
DPEP2	-1.06236	4.40764	-7.25097	4.43179e-11	1.02782e-09	14.8336
LY6D	0.474389	2.78726	7.2497	4.46092e-11	1.03374e-09	14.8272
ORMDL2	0.751621	3.46875	7.24949	4.4656e-11	1.03398e-09	14.8262
PRSS33	0.787742	2.85903	7.24855	4.48719e-11	1.03759e-09	14.8215
SERPINA12	1.66256	3.0292	7.2485	4.48845e-11	1.03759e-09	14.8212
PSMD13	2.24911	4.17014	7.24817	4.49586e-11	1.03846e-09	14.8196
ANKRD30B	-1.98076	7.85728	-7.24699	4.52325e-11	1.04383e-09	14.8137
CHST14	0.782898	3.91608	7.24685	4.52644e-11	1.04383e-09	14.813
RIC8B	0.764597	4.06906	7.24643	4.53622e-11	1.04524e-09	14.8109
MAPK15	1.29463	3.15986	7.24623	4.54083e-11	1.04545e-09	14.8099
HIST1H3I	0.708031	3.02303	7.24492	4.57143e-11	1.05165e-09	14.8033
WDR60	1.15573	4.51044	7.24448	4.58188e-11	1.0532e-09	14.8011
LOC284912	0.796774	2.91828	7.24412	4.59026e-11	1.05428e-09	14.7993
ZNF584	2.16965	3.59169	7.2437	4.60023e-11	1.05572e-09	14.7972
TNNC2	0.228081	2.8296	7.24231	4.63302e-11	1.06204e-09	14.7903
HCLS1	-1.88443	6.58569	-7.24222	4.63522e-11	1.06204e-09	14.7898
CD68	-2.2055	8.15304	-7.24196	4.64141e-11	1.0626e-09	14.7885
NACC1	0.761877	3.22127	7.24118	4.66017e-11	1.06604e-09	14.7846
CDH22	1.19813	3.09036	7.24066	4.67251e-11	1.06801e-09	14.782
C6ORF114	1.61601	3.20813	7.23943	4.70205e-11	1.0739e-09	14.7759
CSNK2A1	1.00601	4.01795	7.23904	4.71153e-11	1.0752e-09	14.7739
HS.374278	1.29772	3.98448	7.2383	4.72933e-11	1.07778e-09	14.7702
ITGB8	1.404	3.1157	7.23826	4.73038e-11	1.07778e-09	14.77
LOC644640	1.85521	3.39599	7.23785	4.7403e-11	1.07918e-09	14.768
IL32	-1.10304	4.60299	-7.23675	4.76706e-11	1.0844e-09	14.7625
HS.564680	2.1176	3.28799	7.23651	4.77298e-11	1.08488e-09	14.7613
LHX8	0.479486	2.80867	7.23584	4.78929e-11	1.08772e-09	14.7579
MORN5	0.873456	2.87239	7.2346	4.82001e-11	1.09383e-09	14.7517
LOC651807	-0.192448	3.16726	-7.23406	4.83321e-11	1.09595e-09	14.749
MRPS35	1.85367	4.48473	7.23371	4.84201e-11	1.09707e-09	14.7473
LOC645737	0.999736	3.24056	7.23227	4.87775e-11	1.1035e-09	14.7401
TNNI3K	0.870672	3.12375	7.23226	4.87814e-11	1.1035e-09	14.74
DKFZP781N1041	1.24079	3.183	7.23178	4.89011e-11	1.10534e-09	14.7376
KRTAP20-2	1.2338	2.95769	7.23113	4.90643e-11	1.10739e-09	14.7344
SLC8A1	0.688052	2.98892	7.23111	4.90697e-11	1.10739e-09	14.7343
HS.438858	-0.452405	3.34089	-7.23073	4.91653e-11	1.10867e-09	14.7324
ENPP6	1.91242	3.45583	7.22916	4.9563e-11	1.11676e-09	14.7245
CCDC42	1.59683	3.15476	7.2282	4.9806e-11	1.12134e-09	14.7197
ELAVL2	1.0293	2.942	7.22746	4.99955e-11	1.12472e-09	14.716
IRS4	1.50044	3.29089	7.22541	5.05236e-11	1.13491e-09	14.7058
LOC643369	1.53379	3.05085	7.22539	5.0528e-11	1.13491e-09	14.7057
SLC25A21	1.62313	3.14723	7.22501	5.06288e-11	1.13628e-09	14.7038
PRPF6	0.500462	3.35751	7.22428	5.08183e-11	1.13963e-09	14.7001
DUX2	0.935945	3.02666	7.22352	5.10144e-11	1.14313e-09	14.6964
COMP	-2.20044	6.78526	-7.22261	5.12541e-11	1.1476e-09	14.6918
CNKSR1	1.21446	3.17569	7.22223	5.1355e-11	1.14896e-09	14.6899
OR2C1	0.908983	2.94725	7.22054	5.17991e-11	1.15798e-09	14.6815
IGDCC3	0.95963	2.92534	7.2199	5.19709e-11	1.16091e-09	14.6783
POLK	1.09987	3.17034	7.21973	5.20147e-11	1.16098e-09	14.6774
ZNF575	0.746634	3.1412	7.21853	5.23356e-11	1.16667e-09	14.6714
ZNF507	1.6098	3.44942	7.21847	5.23516e-11	1.16667e-09	14.6711
C6ORF142	0.684613	2.90477	7.2156	5.31278e-11	1.18305e-09	14.6568
SLC44A4	-2.16781	9.5125	-7.21477	5.33531e-11	1.18714e-09	14.6527
HS.306690	1.32247	3.2283	7.21453	5.34201e-11	1.1877e-09	14.6515
GOLGA1	2.28963	4.13364	7.21356	5.36865e-11	1.19269e-09	14.6466
LOC401623	0.875072	3.23028	7.21307	5.38214e-11	1.19476e-09	14.6442
TUBB8	0.797805	2.92526	7.21089	5.44247e-11	1.20721e-09	14.6333
C11ORF66	1.04605	3.06374	7.2107	5.4477e-11	1.20743e-09	14.6324
C11ORF42	1.42029	3.06316	7.2104	5.45615e-11	1.20837e-09	14.6308
NEURL	1.19344	3.06029	7.20997	5.46825e-11	1.2101e-09	14.6287
GPRC5D	0.676308	2.90717	7.20877	5.50197e-11	1.21662e-09	14.6227
GPR137	-1.11163	5.59313	-7.2084	5.51219e-11	1.21794e-09	14.6209
CYP26C1	0.959659	3.0207	7.20786	5.52768e-11	1.22041e-09	14.6181
PARP14	-1.10942	4.87723	-7.2073	5.54337e-11	1.22293e-09	14.6154
PNLIPRP2	0.895449	2.85982	7.20634	5.57069e-11	1.22801e-09	14.6106
DUSP5P	0.257184	2.89176	7.20539	5.5979e-11	1.23256e-09	14.6058
C19ORF6	-1.09724	5.3926	-7.20525	5.60187e-11	1.23256e-09	14.6051
FXYD7	1.68344	3.16483	7.20517	5.60432e-11	1.23256e-09	14.6047
BMP15	1.05091	2.96703	7.20328	5.65881e-11	1.24359e-09	14.5953
CENPQ	1.01678	3.26213	7.20306	5.66495e-11	1.24377e-09	14.5942
C19ORF23	2.50456	3.36269	7.20295	5.66838e-11	1.24377e-09	14.5936
C6ORF126	0.511101	2.75277	7.20236	5.68551e-11	1.24657e-09	14.5907
IL18	-2.52312	9.45888	-7.1999	5.75749e-11	1.26138e-09	14.5784
TOX3	0.450663	2.81958	7.19951	5.76884e-11	1.2629e-09	14.5765
SEC14L4	1.29266	3.02793	7.1987	5.7928e-11	1.26704e-09	14.5725
KIAA1641	-0.914798	4.51984	-7.19857	5.79667e-11	1.26704e-09	14.5718
OR4C46	1.35111	3.04288	7.1978	5.81974e-11	1.27111e-09	14.568
MLL	1.44814	3.97849	7.19681	5.8491e-11	1.27655e-09	14.563
THYN1	0.853443	4.60658	7.19626	5.86574e-11	1.2792e-09	14.5603
LOC440925	0.457369	2.84881	7.19519	5.89786e-11	1.28522e-09	14.555
LOC401934	-0.215737	3.13097	-7.19486	5.90793e-11	1.28629e-09	14.5533
CTDSPL2	0.732899	3.72088	7.19473	5.91178e-11	1.28629e-09	14.5527
MTERFD3	0.874517	3.08887	7.19441	5.92151e-11	1.28742e-09	14.5511
IFNA5	1.22463	2.95625	7.19408	5.93145e-11	1.28808e-09	14.5494
FABP2	1.05133	3.01733	7.19401	5.93357e-11	1.28808e-09	14.5491
DNAJC2	1.64262	3.32398	7.19342	5.95135e-11	1.29095e-09	14.5462
C4B	1.02838	3.1601	7.19253	5.97851e-11	1.29586e-09	14.5417
C17ORF53	-0.323033	3.32746	-7.19144	6.01201e-11	1.30213e-09	14.5363
RFXANK	1.06867	4.42555	7.19027	6.04828e-11	1.30894e-09	14.5304
C6ORF117	1.92622	4.13013	7.19013	6.05262e-11	1.30894e-09	14.5297
UGT1A3	1.99281	3.57012	7.18892	6.08998e-11	1.31602e-09	14.5237
LOC728621	0.794308	2.86813	7.18843	6.10525e-11	1.31832e-09	14.5213
PRAMEF16	1.03245	2.94221	7.18737	6.13862e-11	1.32354e-09	14.516
AQP12A	1.49599	3.17742	7.18736	6.13873e-11	1.32354e-09	14.5159
C11ORF87	0.984244	2.95259	7.18676	6.1577e-11	1.32631e-09	14.5129
SPATS2L	1.86606	5.71605	7.18666	6.16088e-11	1.32631e-09	14.5124
ADAM21	1.48773	3.1407	7.18567	6.19218e-11	1.33204e-09	14.5075
CHAC1	1.17724	3.09732	7.18496	6.21466e-11	1.33587e-09	14.504
LOC645508	0.912766	3.11448	7.18478	6.22029e-11	1.33602e-09	14.5031
LOC654080	1.79768	3.26747	7.18464	6.22472e-11	1.33602e-09	14.5024
LOC642219	1.72396	3.25925	7.18438	6.23297e-11	1.33678e-09	14.5011
VTN	0.438132	2.86215	7.18397	6.24621e-11	1.33861e-09	14.499
NXPH2	0.669026	2.88095	7.18324	6.26971e-11	1.34264e-09	14.4954
TMEM83	0.865428	2.92514	7.18259	6.29039e-11	1.34606e-09	14.4921
MYO5B	0.8529	3.30026	7.18224	6.30154e-11	1.34743e-09	14.4904
SPATA13	1.4981	3.57093	7.18151	6.32532e-11	1.35112e-09	14.4867
RFPL3S	-0.248749	3.12639	-7.18142	6.32826e-11	1.35112e-09	14.4863
ASTN2	0.936447	3.79224	7.18114	6.33722e-11	1.35202e-09	14.4849
POLDIP2	0.647749	3.6787	7.18071	6.35131e-11	1.35401e-09	14.4828
PATE1	0.523804	2.9441	7.17953	6.3895e-11	1.36114e-09	14.4769
MGC70870	2.37417	3.21044	7.17862	6.41933e-11	1.36647e-09	14.4724
EVI5	-1.21166	5.69282	-7.17807	6.43757e-11	1.36933e-09	14.4696
ITGB3	1.33327	3.41052	7.176	6.5059e-11	1.38283e-09	14.4593
KIAA0258	1.47441	3.50758	7.17432	6.56193e-11	1.3937e-09	14.451
LOC645712	2.62433	3.30765	7.17129	6.66443e-11	1.41442e-09	14.4358
OR5B17	0.906192	2.89631	7.17059	6.68839e-11	1.41845e-09	14.4323
HIST1H3H	0.494138	2.90709	7.16985	6.71366e-11	1.42275e-09	14.4287
ELSPBP1	1.74212	3.02072	7.16954	6.72422e-11	1.42393e-09	14.4271
SPINK4	0.775398	2.86309	7.16917	6.73692e-11	1.42556e-09	14.4253
PRKCG	0.745502	2.99444	7.169	6.74277e-11	1.42574e-09	14.4245
PPAN	0.781691	3.64893	7.16873	6.75207e-11	1.42626e-09	14.4231
AKAP13	-1.54406	6.28463	-7.16864	6.75525e-11	1.42626e-09	14.4227
FKBP7	2.24628	3.33294	7.16832	6.76619e-11	1.42751e-09	14.4211
TTC9B	1.30361	3.00072	7.16797	6.77838e-11	1.42902e-09	14.4193
LOC727909	1.5309	3.31197	7.16711	6.80827e-11	1.43427e-09	14.415
TLCD1	1.06849	3.15257	7.1669	6.81547e-11	1.43472e-09	14.414
CORO1A	-1.63077	5.24441	-7.16637	6.83426e-11	1.43761e-09	14.4113
LOC646195	-1.83575	9.72815	-7.16539	6.86827e-11	1.4437e-09	14.4065
DAPP1	-2.26715	8.85538	-7.16516	6.87662e-11	1.44439e-09	14.4053
LOC652668	0.679377	3.23716	7.16489	6.88579e-11	1.44526e-09	14.404
TMEM108	1.13061	3.29206	7.16252	6.97e-11	1.46185e-09	14.3921
ATG16L2	-0.882581	4.36468	-7.16158	7.00346e-11	1.46779e-09	14.3875
ABCB5	1.36987	2.96512	7.16136	7.0114e-11	1.46838e-09	14.3864
KIAA0251	0.512775	3.08463	7.15935	7.08353e-11	1.48239e-09	14.3764
MUCL1	0.898239	3.0577	7.15896	7.09774e-11	1.48428e-09	14.3744
H2AFB2	1.22795	3.00911	7.15823	7.1241e-11	1.48762e-09	14.3708
PDIA3	0.644926	2.96171	7.15808	7.12961e-11	1.48762e-09	14.3701
CC2D2B	0.49269	2.97789	7.15802	7.13193e-11	1.48762e-09	14.3698
MGAT5B	1.01298	3.14869	7.15784	7.13852e-11	1.48762e-09	14.3689
FAM10A6	0.744149	2.8682	7.1578	7.1398e-11	1.48762e-09	14.3687
HILS1	0.585766	2.93617	7.15707	7.1667e-11	1.49147e-09	14.365
PTGDS	-2.14332	6.74059	-7.15701	7.16876e-11	1.49147e-09	14.3647
CYP8B1	0.694428	2.90986	7.15664	7.18234e-11	1.4932e-09	14.3629
PRG3	1.01694	2.91931	7.15564	7.21914e-11	1.49976e-09	14.3579
HLA-A	-2.37086	9.11949	-7.15499	7.24296e-11	1.50361e-09	14.3547
PRAMEF8	0.538673	2.92408	7.1544	7.26488e-11	1.50707e-09	14.3518
ARNTL2	0.47148	2.99716	7.15348	7.29904e-11	1.51305e-09	14.3472
GYS1	1.8238	3.747	7.15296	7.31846e-11	1.51597e-09	14.3446
PIWIL1	1.34546	3.13392	7.15236	7.34081e-11	1.5195e-09	14.3416
LOC606724	-1.58386	5.29962	-7.15206	7.35204e-11	1.52072e-09	14.3401
MUPCDH	1.1231	2.98443	7.15181	7.36157e-11	1.52159e-09	14.3389
TCOF1	1.13742	3.01449	7.15152	7.37253e-11	1.52275e-09	14.3374
GPR150	0.602749	2.90697	7.15058	7.40804e-11	1.52897e-09	14.3327
CDCA1	1.39111	3.02363	7.15016	7.42401e-11	1.53103e-09	14.3306
HS.571028	1.23509	3.34585	7.15003	7.42875e-11	1.53103e-09	14.33
LOC651586	2.5767	3.37548	7.1471	7.5407e-11	1.55268e-09	14.3154
OR1N2	0.608947	2.90599	7.147	7.54471e-11	1.55268e-09	14.3149
HS.565972	1.0288	3.05807	7.14613	7.57834e-11	1.55848e-09	14.3106
HS.572928	1.24187	3.0251	7.14516	7.61595e-11	1.56509e-09	14.3058
DPY19L2P2	0.677196	3.17642	7.14408	7.65787e-11	1.57257e-09	14.3004
OR1L6	1.65055	3.08897	7.1435	7.68041e-11	1.57606e-09	14.2975
LRRIQ1	0.837425	2.82983	7.14315	7.69418e-11	1.57775e-09	14.2958
C21ORF55	-2.4815	9.28584	-7.14297	7.70137e-11	1.57809e-09	14.2949
SELL	-1.53239	4.28274	-7.14047	7.80036e-11	1.59722e-09	14.2824
HS.541352	1.73717	3.31857	7.13761	7.91484e-11	1.61938e-09	14.2682
ABO	0.937549	2.90909	7.1374	7.92314e-11	1.61938e-09	14.2672
HS.195725	1.67976	3.23963	7.13734	7.92559e-11	1.61938e-09	14.2669
ATG4B	0.899276	3.28961	7.13673	7.95061e-11	1.62333e-09	14.2639
ALG11	1.95724	3.78417	7.13653	7.95857e-11	1.62379e-09	14.2629
TMEM156	-1.23636	5.18421	-7.13524	8.01121e-11	1.63336e-09	14.2565
NPY6R	0.932687	2.92604	7.13464	8.03562e-11	1.63676e-09	14.2535
NPFF	1.56629	3.48327	7.13455	8.0394e-11	1.63676e-09	14.253
ZNF442	1.40127	3.59048	7.13401	8.06165e-11	1.64012e-09	14.2503
SFXN2	2.28417	3.45245	7.13379	8.07057e-11	1.64077e-09	14.2493
SLCO4C1	1.47997	3.14614	7.13354	8.08084e-11	1.64168e-09	14.248
ZNF750	1.25051	2.99203	7.13319	8.09512e-11	1.6432e-09	14.2463
C17ORF108	1.28757	3.52633	7.13308	8.09984e-11	1.6432e-09	14.2457
FSD1CL	0.320654	2.78909	7.1327	8.11558e-11	1.64522e-09	14.2438
SLCO6A1	0.458334	2.81008	7.13243	8.12679e-11	1.64632e-09	14.2425
KIAA2022	1.04249	3.17469	7.13212	8.13971e-11	1.64777e-09	14.2409
MRC1L1	0.47275	2.88931	7.13154	8.16361e-11	1.65144e-09	14.2381
CDX2	0.951241	2.99925	7.13056	8.20458e-11	1.65855e-09	14.2332
FANCM	0.985364	2.96399	7.12989	8.23255e-11	1.66217e-09	14.2299
SLC15A1	0.74895	2.89709	7.12986	8.23416e-11	1.66217e-09	14.2297
HS.193951	2.45707	3.59996	7.12933	8.25625e-11	1.66545e-09	14.2271
C11ORF80	-0.887881	4.17457	-7.12864	8.28528e-11	1.67012e-09	14.2237
DUSP26	1.15185	3.77649	7.12633	8.38368e-11	1.68876e-09	14.2122
LOC285141	1.27394	3.11766	7.12583	8.40474e-11	1.69181e-09	14.2097
HNRPH1	-1.59851	5.27908	-7.12462	8.45689e-11	1.70111e-09	14.2037
PRDM9	1.09281	3.26504	7.12381	8.49207e-11	1.70698e-09	14.1996
C1QTNF8	0.878063	3.0027	7.12358	8.5019e-11	1.70775e-09	14.1985
DMXL2	-0.64033	3.59303	-7.12229	8.55782e-11	1.71777e-09	14.1921
FAM55B	0.597484	2.83801	7.12198	8.57144e-11	1.71831e-09	14.1906
C9ORF41	2.47665	3.42998	7.12196	8.57255e-11	1.71831e-09	14.1904
CEP170	-0.271925	3.22372	-7.12127	8.6027e-11	1.72314e-09	14.187
LOC652435	1.87903	3.16878	7.12025	8.64721e-11	1.73084e-09	14.182
LOC647970	0.929149	3.11625	7.11782	8.75533e-11	1.75125e-09	14.1699
HS.529442	2.26967	3.24874	7.11744	8.77219e-11	1.75339e-09	14.168
HLA-DRA	-2.5339	9.11235	-7.11641	8.81828e-11	1.76137e-09	14.1629
UCP3	1.28952	3.37687	7.11587	8.84261e-11	1.76499e-09	14.1602
ARID3A	-0.941902	4.55503	-7.11482	8.88999e-11	1.77321e-09	14.155
TDRD9	1.77279	3.44317	7.1134	8.95448e-11	1.78482e-09	14.148
TRO	1.08874	4.32656	7.11318	8.96452e-11	1.78498e-09	14.1469
FAM118B	2.22015	3.82314	7.11304	8.9712e-11	1.78498e-09	14.1462
TAF9B	1.55893	2.96196	7.11297	8.97408e-11	1.78498e-09	14.1458
BPIL3	2.56904	3.36623	7.11273	8.98526e-11	1.78596e-09	14.1446
HS.22381	1.02768	3.33935	7.11253	8.9943e-11	1.78651e-09	14.1436
QRSL1	0.738528	3.12488	7.11189	9.0239e-11	1.79114e-09	14.1404
CHPF2	-0.6243	4.09594	-7.11141	9.04566e-11	1.79291e-09	14.1381
TAAR8	1.02115	3.22495	7.11135	9.04849e-11	1.79291e-09	14.1378
FAM83H	0.803333	3.15013	7.11128	9.05169e-11	1.79291e-09	14.1374
PCDHGB1	1.01631	3.02013	7.11068	9.07959e-11	1.79719e-09	14.1345
GNL1	-0.981146	4.99679	-7.1104	9.09264e-11	1.79853e-09	14.133
NBEAL1	0.290207	2.77691	7.10954	9.13239e-11	1.80513e-09	14.1288
TBCB	1.167	6.45164	7.10914	9.151e-11	1.80756e-09	14.1268
MIXL1	2.00527	3.27561	7.10888	9.16303e-11	1.80868e-09	14.1255
CAPS	-0.65457	3.9799	-7.10795	9.20651e-11	1.81601e-09	14.1209
NWD1	0.349957	2.77678	7.10727	9.23861e-11	1.82108e-09	14.1175
PLEKHH2	1.52254	3.68329	7.10707	9.24787e-11	1.8216e-09	14.1166
DTWD2	-1.87744	7.50143	-7.10694	9.25403e-11	1.8216e-09	14.1159
FAM128B	0.6889	2.91654	7.10668	9.26632e-11	1.82276e-09	14.1146
GPR153	1.63103	3.40887	7.10638	9.28043e-11	1.82428e-09	14.1131
CECR1	-1.85685	6.50428	-7.10573	9.31113e-11	1.82905e-09	14.1099
ZNF287	0.261212	2.85916	7.10526	9.33353e-11	1.83219e-09	14.1076
LOC643866	2.53924	3.40157	7.105	9.34577e-11	1.83333e-09	14.1063
LOC390956	1.92161	3.31654	7.10467	9.36165e-11	1.83518e-09	14.1046
GPD2	1.31666	3.33331	7.10433	9.37788e-11	1.8371e-09	14.1029
HS.555583	1.85204	3.42633	7.10382	9.40244e-11	1.84064e-09	14.1004
RBED1	2.1298	4.02134	7.1015	9.51411e-11	1.86071e-09	14.0889
PDCL3	1.05167	4.77139	7.10121	9.52824e-11	1.86071e-09	14.0874
CSNK2A2	1.08413	4.5529	7.10118	9.52963e-11	1.86071e-09	14.0873
FLJ35880	1.18797	3.12681	7.10115	9.53105e-11	1.86071e-09	14.0872
CCDC15	1.02659	3.48204	7.10078	9.54878e-11	1.86289e-09	14.0854
HS.34747	1.45301	3.18133	7.09992	9.59084e-11	1.86982e-09	14.0811
EPC2	0.5952	3.16368	7.09951	9.61103e-11	1.87247e-09	14.079
HRH3	0.954316	2.90916	7.09932	9.62026e-11	1.87299e-09	14.0781
PLCB2	-1.003	4.53454	-7.09862	9.6547e-11	1.87842e-09	14.0746
C7ORF69	0.961216	2.91681	7.09769	9.70018e-11	1.88598e-09	14.07
NAGS	1.25226	3.22059	7.09694	9.73735e-11	1.8917e-09	14.0663
HS.365998	2.0189	3.30142	7.09683	9.74288e-11	1.8917e-09	14.0657
FLJ10120	-0.218133	3.09848	-7.09634	9.76737e-11	1.89516e-09	14.0633
SNORD15B	-0.253388	3.11221	-7.09613	9.7778e-11	1.8959e-09	14.0623
RNF128	0.813997	3.39605	7.0959	9.78895e-11	1.89677e-09	14.0611
LOC732075	1.95667	3.74916	7.09541	9.81346e-11	1.90022e-09	14.0587
SH3GL2	1.18576	3.05527	7.09474	9.84735e-11	1.90414e-09	14.0553
ZNF805	1.21907	3.87988	7.09471	9.84883e-11	1.90414e-09	14.0552
TMEM119	-1.67489	6.08638	-7.09461	9.8537e-11	1.90414e-09	14.0547
SNHG11	-0.449338	3.6885	-7.09336	9.91681e-11	1.91413e-09	14.0485
BTBD8	2.52057	3.50168	7.09331	9.91886e-11	1.91413e-09	14.0483
DRP2	0.897773	2.90679	7.09235	9.96762e-11	1.92224e-09	14.0435
OR5AU1	1.20186	2.98196	7.09104	1.00344e-10	1.93381e-09	14.037
LOC652258	1.41223	3.09455	7.09077	1.00479e-10	1.9351e-09	14.0357
CFHR5	0.419746	2.95593	7.08928	1.01246e-10	1.94855e-09	14.0283
PCDHB7	0.453898	2.76395	7.08874	1.01524e-10	1.95259e-09	14.0256
HS.582239	1.39805	3.41932	7.08842	1.01688e-10	1.95443e-09	14.024
LOC146053	0.345247	3.05473	7.08694	1.02458e-10	1.96581e-09	14.0167
LOC731438	1.83679	3.24135	7.08693	1.02466e-10	1.96581e-09	14.0166
TMEM68	0.571809	2.96401	7.08678	1.02542e-10	1.96581e-09	14.0159
KCND1	0.510102	3.41955	7.08675	1.02556e-10	1.96581e-09	14.0158
RASEF	2.00948	3.2149	7.0866	1.02634e-10	1.96597e-09	14.015
TMOD4	0.740055	3.12602	7.0862	1.02846e-10	1.96761e-09	14.013
POMC	0.767661	3.26006	7.08618	1.02857e-10	1.96761e-09	14.0129
BMPER	0.852698	2.90797	7.08595	1.02974e-10	1.96852e-09	14.0118
ACAT2	1.30943	4.50076	7.08567	1.03123e-10	1.97006e-09	14.0104
HMG20A	-0.531732	4.02542	-7.08537	1.03283e-10	1.97178e-09	14.0089
FLJ11235	0.505408	3.42661	7.08461	1.03682e-10	1.97761e-09	14.0051
HS.570460	1.49841	3.28618	7.08452	1.03727e-10	1.97761e-09	14.0047
LOC644436	0.710285	3.06589	7.08417	1.03912e-10	1.97981e-09	14.003
OR5B21	1.28068	2.99697	7.08353	1.04253e-10	1.98499e-09	13.9998
USP27X	1.39958	3.25863	7.08223	1.04941e-10	1.99675e-09	13.9934
EZH2	-0.462757	3.427	-7.08192	1.0511e-10	1.99862e-09	13.9918
LOC440295	0.938119	2.90586	7.08166	1.05246e-10	1.99989e-09	13.9905
SOST	1.28715	3.36334	7.08087	1.05672e-10	2.00665e-09	13.9866
PRKCE	1.04728	3.37197	7.08032	1.05968e-10	2.01057e-09	13.9839
TNNI1	1.22638	2.97394	7.08016	1.06051e-10	2.01057e-09	13.9831
ZNF205	1.12281	3.61381	7.08	1.0614e-10	2.01057e-09	13.9823
LOC645144	1.50416	3.18661	7.07996	1.06161e-10	2.01057e-09	13.9821
UBL4A	0.701571	4.41035	7.07839	1.07011e-10	2.02458e-09	13.9743
CNTLN	0.862141	3.35979	7.07833	1.07043e-10	2.02458e-09	13.974
C12ORF72	0.800915	2.95917	7.07705	1.07746e-10	2.03653e-09	13.9677
PKN1	1.77432	4.76554	7.07587	1.08395e-10	2.04744e-09	13.9618
LOC644590	-0.6293	3.70396	-7.07551	1.08594e-10	2.04984e-09	13.96
HS.554066	2.55037	3.34904	7.07515	1.08788e-10	2.05214e-09	13.9583
ANXA6	1.10427	4.14236	7.07493	1.08915e-10	2.05317e-09	13.9571
LOC646223	1.28674	3.29483	7.07465	1.09067e-10	2.05421e-09	13.9558
LOC653994	1.56062	3.47527	7.07453	1.09134e-10	2.05421e-09	13.9552
MYOZ1	0.577793	3.43384	7.07444	1.09186e-10	2.05421e-09	13.9547
LCA5	0.552091	3.12205	7.07333	1.09805e-10	2.06449e-09	13.9492
RPS6KL1	1.00394	3.37491	7.07286	1.10063e-10	2.06798e-09	13.9469
ZNF135	1.0454	3.68403	7.07257	1.10229e-10	2.06974e-09	13.9455
COL9A2	0.892919	3.62034	7.07219	1.10437e-10	2.07228e-09	13.9436
LOC132707	1.299	3.09843	7.07156	1.10795e-10	2.07762e-09	13.9405
IP6K1	1.40577	5.40826	7.0714	1.10882e-10	2.07789e-09	13.9397
TECTB	1.76145	3.06643	7.07081	1.11215e-10	2.08173e-09	13.9368
PTPLAD2	-1.59413	6.61135	-7.07078	1.11233e-10	2.08173e-09	13.9366
FLJ32867	1.09585	3.17556	7.06967	1.11866e-10	2.09145e-09	13.9311
NME2	0.810479	4.24963	7.06961	1.11899e-10	2.09145e-09	13.9308
OR5K1	0.510411	2.79801	7.06866	1.12439e-10	2.10017e-09	13.9261
GMCL1	0.600162	3.79091	7.06789	1.12881e-10	2.10704e-09	13.9223
ATCAY	0.575596	2.90377	7.0669	1.13448e-10	2.11599e-09	13.9174
LOC389286	1.02573	3.58772	7.06672	1.13555e-10	2.11599e-09	13.9165
KCNG4	1.70657	3.21072	7.06667	1.13583e-10	2.11599e-09	13.9163
ROBO2	2.43037	3.43666	7.06626	1.13818e-10	2.11898e-09	13.9142
LOC284064	2.38168	3.3993	7.06594	1.14004e-10	2.12106e-09	13.9126
DLK1	1.70509	3.12839	7.06576	1.1411e-10	2.12164e-09	13.9117
MXI1	1.96666	3.52453	7.06528	1.14386e-10	2.12538e-09	13.9094
LOC651704	1.86533	3.20415	7.06385	1.15221e-10	2.13952e-09	13.9023
LOC440748	1.19881	3.33201	7.06362	1.15358e-10	2.14065e-09	13.9011
SPATA6	0.479379	3.11758	7.06266	1.15924e-10	2.14976e-09	13.8964
HS.538798	2.54957	3.44656	7.06231	1.16127e-10	2.15212e-09	13.8947
LOC652455	1.19091	3.37364	7.06167	1.16503e-10	2.1577e-09	13.8915
CMKLR1	0.511821	3.24911	7.06071	1.17077e-10	2.16691e-09	13.8867
ZNF175	1.10168	3.86865	7.06039	1.17266e-10	2.169e-09	13.8852
SLC1A7	0.87132	3.33245	7.06009	1.17443e-10	2.17087e-09	13.8837
CCDC62	1.51817	3.22851	7.05954	1.17772e-10	2.17555e-09	13.881
IKBIP	1.12735	3.70417	7.05924	1.17951e-10	2.17744e-09	13.8795
ARHGAP9	-1.62032	5.38665	-7.05869	1.18284e-10	2.18217e-09	13.8767
SLC6A15	1.37112	3.1057	7.05847	1.18413e-10	2.18222e-09	13.8757
FAT3	0.779119	3.55924	7.05832	1.18508e-10	2.18222e-09	13.8749
DSPP	2.55622	3.35681	7.0583	1.18516e-10	2.18222e-09	13.8748
RALGDS	-1.6374	6.73125	-7.05806	1.18663e-10	2.1835e-09	13.8736
HS.539161	2.34465	3.3768	7.05687	1.19381e-10	2.1953e-09	13.8677
CDADC1	1.86511	3.44484	7.05619	1.19797e-10	2.20153e-09	13.8644
AQP6	2.18037	3.38784	7.05392	1.21184e-10	2.22559e-09	13.8531
LOC134145	1.76112	3.30278	7.05295	1.21784e-10	2.23517e-09	13.8483
ZNF404	1.73961	3.33767	7.05278	1.21889e-10	2.23565e-09	13.8475
SMYD4	1.09662	4.11998	7.05195	1.22402e-10	2.24362e-09	13.8434
PRKACG	0.608357	2.92371	7.0514	1.22746e-10	2.24798e-09	13.8407
DUSP21	2.21252	3.37	7.05131	1.22798e-10	2.24798e-09	13.8403
KCNAB3	0.983992	2.98847	7.05103	1.22975e-10	2.24978e-09	13.8388
CRSP2	2.18125	3.62083	7.05005	1.23588e-10	2.25954e-09	13.834
FOXA3	1.66772	3.06829	7.04927	1.24077e-10	2.26703e-09	13.8302
LOXL4	2.00096	4.86837	7.04909	1.24194e-10	2.26772e-09	13.8292
HS.334493	1.60748	3.30134	7.04895	1.24281e-10	2.26785e-09	13.8286
CACNG5	0.959754	3.11051	7.04866	1.24465e-10	2.26976e-09	13.8271
LOC645891	1.24068	3.14258	7.04725	1.25358e-10	2.28458e-09	13.8202
LOC651302	2.17527	3.60271	7.04703	1.25496e-10	2.28563e-09	13.8191
ARSE	0.349705	2.80179	7.04669	1.25713e-10	2.28711e-09	13.8174
FAM71F1	1.53484	3.22751	7.04665	1.25738e-10	2.28711e-09	13.8172
HS.529324	1.38057	3.3501	7.04619	1.26034e-10	2.29103e-09	13.8149
LOC646350	2.232	3.34521	7.04568	1.26365e-10	2.29558e-09	13.8124
LOC642344	2.54065	3.42667	7.04497	1.2682e-10	2.30141e-09	13.8089
HS.249957	2.15594	3.40383	7.04492	1.26847e-10	2.30141e-09	13.8086
ORC2L	1.54456	4.13539	7.04406	1.27408e-10	2.31012e-09	13.8043
COL6A3	-2.19103	7.82802	-7.0439	1.27508e-10	2.31014e-09	13.8036
KIAA1026	1.86797	3.57257	7.0438	1.27571e-10	2.31014e-09	13.8031
FLJ44955	0.420372	2.90311	7.04311	1.28018e-10	2.31606e-09	13.7997
GLIPR1L1	0.645122	2.98883	7.04305	1.28061e-10	2.31606e-09	13.7994
APOA4	2.11747	3.31656	7.04266	1.28312e-10	2.31861e-09	13.7975
SERPINB9	-0.396428	3.27584	-7.04258	1.28364e-10	2.31861e-09	13.7971
FAM91A2	1.32676	3.38025	7.042	1.28746e-10	2.32289e-09	13.7942
ZNF497	1.22834	3.07101	7.04197	1.28764e-10	2.32289e-09	13.794
MARCKSL1	-1.51045	5.45997	-7.04174	1.28912e-10	2.32409e-09	13.7929
HS.560536	2.50754	3.48408	7.04157	1.29024e-10	2.32463e-09	13.7921
MCMDC1	0.728844	3.06346	7.04057	1.2968e-10	2.33499e-09	13.7871
C11ORF51	0.915696	3.81285	7.03926	1.30546e-10	2.34909e-09	13.7806
NRSN1	1.30955	3.06191	7.03903	1.30697e-10	2.35033e-09	13.7795
FLJ43879	2.54433	3.41111	7.03846	1.31077e-10	2.35567e-09	13.7767
ZNF530	0.473596	2.86975	7.03818	1.31262e-10	2.35709e-09	13.7753
SNRPB	-1.40904	6.2407	-7.03809	1.31322e-10	2.35709e-09	13.7749
LOC642049	0.467698	3.28998	7.03744	1.31757e-10	2.36342e-09	13.7716
VAX2	1.82388	3.35906	7.03724	1.31892e-10	2.36385e-09	13.7706
GDF5	0.354894	2.82882	7.03716	1.31947e-10	2.36385e-09	13.7702
LOC401087	1.12714	3.10325	7.03568	1.32941e-10	2.37909e-09	13.7629
LSAMP	-0.349701	3.43508	-7.03564	1.32965e-10	2.37909e-09	13.7628
HS.582102	1.6504	3.32767	7.03312	1.34675e-10	2.40817e-09	13.7503
KIF18B	0.821459	2.88884	7.03291	1.34825e-10	2.40935e-09	13.7492
HS.441213	1.22944	3.34793	7.03228	1.3525e-10	2.41543e-09	13.7462
AGBL1	1.45895	3.12316	7.03178	1.35597e-10	2.41928e-09	13.7437
LOC644596	1.4945	3.38349	7.03172	1.35635e-10	2.41928e-09	13.7434
FAM120C	0.969146	3.16786	7.03103	1.36115e-10	2.426e-09	13.7399
OR52N4	0.515576	2.85205	7.03093	1.36182e-10	2.426e-09	13.7395
ATAD3A	1.51566	4.24147	7.03021	1.36679e-10	2.43333e-09	13.7359
TBCCD1	1.0151	3.48294	7.02996	1.36857e-10	2.43497e-09	13.7347
HS.554282	2.51888	3.35662	7.02962	1.37089e-10	2.43744e-09	13.733
LOC255326	1.40339	3.36221	7.02951	1.37166e-10	2.43744e-09	13.7325
MUM1L1	1.59079	3.27174	7.02829	1.38021e-10	2.4511e-09	13.7264
CECR6	1.09901	3.31644	7.02746	1.38599e-10	2.45982e-09	13.7223
FBXL8	0.34634	2.94727	7.02709	1.38861e-10	2.46294e-09	13.7205
AVL9	2.48581	3.54701	7.02683	1.39045e-10	2.46467e-09	13.7192
ZNF425	0.522059	3.2201	7.02659	1.3921e-10	2.46558e-09	13.718
SLC10A2	2.02529	3.29107	7.02646	1.39305e-10	2.46558e-09	13.7174
OR5H14	0.70325	2.86659	7.02639	1.39356e-10	2.46558e-09	13.717
PTCHD3	1.90771	3.27476	7.02596	1.3966e-10	2.46943e-09	13.7149
DHH	1.55548	3.28539	7.02583	1.39752e-10	2.46953e-09	13.7143
KRT40	0.590309	2.80542	7.02541	1.40046e-10	2.47319e-09	13.7122
LOC440518	1.1744	3.28639	7.02508	1.40284e-10	2.47586e-09	13.7106
LOC643382	1.11891	3.12863	7.02476	1.4051e-10	2.47831e-09	13.709
LOC643895	1.35409	3.10666	7.02438	1.4078e-10	2.48085e-09	13.7071
MAP4K1	-1.49363	4.76025	-7.02432	1.40828e-10	2.48085e-09	13.7068
LHX4	0.914916	3.02794	7.02406	1.41011e-10	2.48254e-09	13.7055
ZNF230	0.946469	3.28006	7.02264	1.42029e-10	2.49893e-09	13.6985
HS.575889	1.63765	3.16481	7.02208	1.42432e-10	2.50417e-09	13.6957
NOL10	-0.3474	3.53846	-7.02198	1.42503e-10	2.50417e-09	13.6953
TCTN2	0.650877	2.90773	7.02155	1.42814e-10	2.50442e-09	13.6931
LOC388312	1.02174	3.1415	7.0215	1.42851e-10	2.50442e-09	13.6929
NDUFS6	0.767768	2.87223	7.0215	1.42853e-10	2.50442e-09	13.6929
LOC344875	1.81635	3.26919	7.02138	1.42937e-10	2.50442e-09	13.6923
UBXN7	1.63148	3.30432	7.02136	1.42956e-10	2.50442e-09	13.6922
EFHA2	1.49005	3.33174	7.02116	1.43101e-10	2.50542e-09	13.6912
OCIAD1	-2.24383	8.59221	-7.02086	1.43319e-10	2.50768e-09	13.6897
PBX4	-0.711625	3.7279	-7.02065	1.43468e-10	2.50875e-09	13.6887
RGS1	-2.41069	6.37832	-7.02002	1.43929e-10	2.51431e-09	13.6856
LOC650239	0.996603	3.09326	7.01997	1.43962e-10	2.51431e-09	13.6853
C1ORF220	1.51557	3.19315	7.01969	1.4417e-10	2.5164e-09	13.6839
PSMG1	1.09481	4.71523	7.01951	1.44302e-10	2.51715e-09	13.683
ZNF181	1.14071	3.48697	7.01897	1.447e-10	2.52257e-09	13.6804
HMGCS2	0.699549	2.93632	7.01861	1.44963e-10	2.52561e-09	13.6786
ADAMTSL5	0.706746	3.38231	7.01835	1.45154e-10	2.52739e-09	13.6773
LOC147670	2.06388	3.34412	7.01785	1.45519e-10	2.53164e-09	13.6749
PIK3CD	-0.953674	4.44463	-7.01778	1.45576e-10	2.53164e-09	13.6745
GSDMB	-0.877803	4.70922	-7.01645	1.46558e-10	2.54716e-09	13.6679
RASSF2	-1.58699	6.11389	-7.01609	1.46828e-10	2.5503e-09	13.6661
C20ORF196	1.64104	3.59536	7.01244	1.49567e-10	2.59629e-09	13.6481
KRT19	0.800451	3.39573	7.01175	1.50093e-10	2.60383e-09	13.6447
HS.55246	1.34864	3.67338	7.01033	1.51175e-10	2.62102e-09	13.6377
LOC644137	1.95636	3.23294	7.00846	1.52611e-10	2.64279e-09	13.6285
RPL7L1	-1.79824	9.40346	-7.00846	1.52616e-10	2.64279e-09	13.6285
LOC401218	0.386431	3.39483	7.00829	1.52741e-10	2.64334e-09	13.6277
EIF4H	-1.71175	6.84402	-7.00728	1.53526e-10	2.65503e-09	13.6227
THUMPD3	0.749407	3.29367	7.00718	1.53603e-10	2.65503e-09	13.6222
STK38	-1.23124	5.1338	-7.00692	1.53805e-10	2.65647e-09	13.6209
LOC57399	1.96054	3.32151	7.00684	1.53872e-10	2.65647e-09	13.6205
HS3ST4	0.758417	3.00496	7.00669	1.53984e-10	2.65679e-09	13.6198
LOC729759	1.86658	3.23994	7.00633	1.54267e-10	2.66006e-09	13.618
LHB	2.08215	3.33906	7.00591	1.54595e-10	2.6641e-09	13.6159
TAPBP	-1.63837	6.08512	-7.00579	1.54692e-10	2.66416e-09	13.6153
ELOVL7	1.95032	3.43312	7.00562	1.54826e-10	2.66486e-09	13.6145
LOC643998	1.621	3.32816	7.00534	1.55044e-10	2.66587e-09	13.6131
SELENBP1	1.16513	4.34846	7.00531	1.55072e-10	2.66587e-09	13.6129
KRTAP10-11	1.48127	3.49168	7.00498	1.55324e-10	2.66817e-09	13.6113
UCK1	0.395414	3.28623	7.00486	1.55419e-10	2.66817e-09	13.6108
ST7	0.834925	4.2394	7.00478	1.55486e-10	2.66817e-09	13.6103
MFSD2B	0.523313	2.82785	7.00355	1.56455e-10	2.68318e-09	13.6043
XAGE3	0.68389	2.93227	7.00332	1.56641e-10	2.68475e-09	13.6031
LOC653643	2.42452	3.5513	7.00251	1.5728e-10	2.69408e-09	13.5992
TMEM125	1.41968	3.18931	7.00223	1.57505e-10	2.69566e-09	13.5978
SGSM3	-0.587202	3.86637	-7.00216	1.57562e-10	2.69566e-09	13.5974
LOC651410	2.52841	3.36994	7.00198	1.57705e-10	2.69647e-09	13.5965
SENP3	0.422703	3.07788	7.00186	1.57798e-10	2.69647e-09	13.596
LOC642767	2.18177	3.33299	7.00026	1.59088e-10	2.71689e-09	13.588
TEX101	1.04423	2.95466	7.00012	1.59197e-10	2.71713e-09	13.5874
CERKL	1.8045	3.34425	6.99949	1.59707e-10	2.72371e-09	13.5842
LOC645468	1.02606	2.97449	6.99928	1.59873e-10	2.72371e-09	13.5832
LOC649041	1.28641	3.15574	6.99921	1.5993e-10	2.72371e-09	13.5829
EME2	0.67395	2.99232	6.99917	1.59965e-10	2.72371e-09	13.5827
HS.547160	1.34304	3.308	6.99653	1.62116e-10	2.75868e-09	13.5697
LOC402160	1.84693	3.25564	6.99634	1.62275e-10	2.75974e-09	13.5687
HS.539083	1.91689	3.27723	6.99593	1.62612e-10	2.76145e-09	13.5667
TMC6	-1.16517	5.16962	-6.99589	1.62642e-10	2.76145e-09	13.5665
OR10S1	0.384158	2.93852	6.99586	1.62666e-10	2.76145e-09	13.5664
LOC650488	2.48342	3.46856	6.99561	1.62874e-10	2.76333e-09	13.5651
HS.524873	1.88134	3.40679	6.99507	1.63318e-10	2.76922e-09	13.5625
SLC27A4	2.45652	3.38961	6.99487	1.63487e-10	2.77044e-09	13.5614
GPR172B	1.55468	3.21871	6.99169	1.66136e-10	2.81364e-09	13.5458
MNAT1	0.812415	3.79662	6.99125	1.66513e-10	2.81793e-09	13.5436
HS.340072	2.37595	3.65044	6.99116	1.66586e-10	2.81793e-09	13.5432
DDX54	1.14883	3.44498	6.99077	1.66919e-10	2.81822e-09	13.5412
LOC652839	2.10004	3.43378	6.99076	1.6692e-10	2.81822e-09	13.5412
ANKK1	1.49455	3.15278	6.99075	1.66931e-10	2.81822e-09	13.5411
BLZF1	-2.14795	8.26152	-6.99067	1.66999e-10	2.81822e-09	13.5407
CPNE7	2.48971	3.43843	6.99042	1.67209e-10	2.82009e-09	13.5395
CTAG2	1.06217	3.15711	6.99008	1.67501e-10	2.82334e-09	13.5378
OR10V1	0.513642	2.82606	6.98971	1.67813e-10	2.82694e-09	13.536
DYSFIP1	1.59028	3.2629	6.98808	1.69202e-10	2.84865e-09	13.528
MLF1	-0.403224	3.34593	-6.98782	1.69425e-10	2.85072e-09	13.5267
RIG	2.55083	3.37761	6.98719	1.69971e-10	2.85822e-09	13.5236
TPRG1	0.463222	2.86767	6.98679	1.70314e-10	2.86144e-09	13.5216
CLEC6A	2.26892	3.52477	6.98673	1.70363e-10	2.86144e-09	13.5213
LOC642566	0.979192	2.98006	6.98612	1.70891e-10	2.86861e-09	13.5183
C11ORF53	0.449494	2.94711	6.98583	1.71143e-10	2.87116e-09	13.5169
TXNDC3	-0.252022	3.22075	-6.98461	1.72204e-10	2.88725e-09	13.5109
CBLC	2.06869	3.27945	6.98311	1.73513e-10	2.9075e-09	13.5035
MRGPRX3	0.970197	3.02084	6.98276	1.73823e-10	2.91098e-09	13.5017
ZNF414	1.01239	3.27914	6.98222	1.74292e-10	2.91711e-09	13.4991
GPR37L1	2.6133	3.35307	6.98102	1.75355e-10	2.93318e-09	13.4932
ASCL1	1.58423	3.14474	6.98054	1.75783e-10	2.93862e-09	13.4908
LOC646312	2.3082	3.4654	6.97958	1.76634e-10	2.95111e-09	13.4861
LDB3	0.78671	3.33008	6.97946	1.76743e-10	2.95121e-09	13.4855
C1ORF132	1.31988	3.28157	6.9786	1.77515e-10	2.96236e-09	13.4813
LOC644120	1.89115	3.28735	6.97836	1.77734e-10	2.96428e-09	13.4801
PSD2	0.278695	2.97404	6.9769	1.79049e-10	2.98447e-09	13.4729
HS.554324	-1.77731	5.20887	-6.9755	1.80322e-10	3.00393e-09	13.466
JAK3	0.365832	2.84702	6.97531	1.80497e-10	3.00508e-09	13.465
FLJ45721	1.52663	3.20132	6.97506	1.80721e-10	3.00706e-09	13.4638
SLFNL1	0.463538	2.84796	6.97483	1.80936e-10	3.00888e-09	13.4627
LOC650330	1.81419	3.2092	6.97463	1.81117e-10	3.01013e-09	13.4617
HS.570581	1.41808	3.26648	6.97353	1.82126e-10	3.02514e-09	13.4563
TTTY5	1.23003	3.1701	6.9733	1.82341e-10	3.02695e-09	13.4551
LOC644113	1.0074	3.47193	6.97287	1.82733e-10	3.03053e-09	13.453
HS.306410	1.09638	3.39658	6.97283	1.82769e-10	3.03053e-09	13.4529
HS.579522	1.59016	3.39858	6.97238	1.8319e-10	3.03573e-09	13.4506
LOC642168	1.67013	3.24743	6.97158	1.83929e-10	3.04599e-09	13.4467
LOC646009	2.13774	3.29492	6.97148	1.84022e-10	3.04599e-09	13.4462
LOC644584	2.14917	3.61167	6.97058	1.84866e-10	3.05817e-09	13.4417
LOC150383	1.70891	3.23392	6.97011	1.85307e-10	3.06369e-09	13.4394
C9ORF38	1.23105	3.29626	6.96994	1.85462e-10	3.06448e-09	13.4386
AKNA	-1.24834	5.05615	-6.96981	1.85582e-10	3.06468e-09	13.438
SOX3	1.65476	3.091	6.96951	1.85871e-10	3.06768e-09	13.4365
LOC644311	2.19056	3.42771	6.9691	1.86252e-10	3.07218e-09	13.4345
LRRC31	0.760745	2.92356	6.96836	1.86951e-10	3.08194e-09	13.4308
CD200R1L	2.37568	3.404	6.96821	1.87096e-10	3.08254e-09	13.4301
FLJ33706	1.47146	3.21908	6.96764	1.87628e-10	3.08951e-09	13.4273
LOC150786	0.605493	2.78982	6.96705	1.8819e-10	3.09699e-09	13.4244
TUBGCP3	1.38069	3.13619	6.96625	1.88955e-10	3.10682e-09	13.4204
SLC28A1	1.75588	3.37775	6.9662	1.89006e-10	3.10682e-09	13.4202
MAP3K7IP1	-0.577077	3.98078	-6.96602	1.89175e-10	3.10781e-09	13.4193
SNX9	0.245602	2.80912	6.9659	1.89286e-10	3.10784e-09	13.4187
TMEM76	1.7518	3.22859	6.96498	1.90175e-10	3.12064e-09	13.4142
LOC389827	2.31414	3.40527	6.96438	1.90749e-10	3.12826e-09	13.4112
ADORA1	-0.408078	3.53748	-6.96416	1.90957e-10	3.12905e-09	13.4102
LOC651830	1.78856	3.22563	6.9641	1.91017e-10	3.12905e-09	13.4099
TTC24	2.32201	3.32213	6.96385	1.9126e-10	3.13124e-09	13.4086
MRPL4	0.439004	3.4796	6.96308	1.9201e-10	3.14171e-09	13.4048
PITPNB	1.0316	4.48503	6.96291	1.92168e-10	3.1425e-09	13.404
UBC	-2.65371	9.91941	-6.96277	1.92312e-10	3.14305e-09	13.4033
LOC652615	-0.326496	3.29178	-6.96255	1.9252e-10	3.14464e-09	13.4022
LOC284232	2.23259	3.40919	6.96221	1.92856e-10	3.14833e-09	13.4005
PARS2	0.285824	3.26159	6.96133	1.93717e-10	3.15836e-09	13.3962
CACNG2	0.597378	2.86216	6.96116	1.93877e-10	3.15836e-09	13.3954
DPRX	0.635143	2.84768	6.96112	1.9392e-10	3.15836e-09	13.3952
BOC	2.05541	3.812	6.96109	1.93946e-10	3.15836e-09	13.395
TXNDC6	0.676611	3.04417	6.96101	1.94025e-10	3.15836e-09	13.3947
BCL8	2.33467	3.32391	6.96078	1.94248e-10	3.16019e-09	13.3935
LOXHD1	0.771578	3.22688	6.96055	1.9448e-10	3.16216e-09	13.3924
LOC653934	1.55127	3.33457	6.96014	1.94877e-10	3.16681e-09	13.3904
TXNL4B	0.893721	3.40449	6.95957	1.95441e-10	3.17417e-09	13.3876
HCG4P6	1.41008	3.18049	6.95943	1.95584e-10	3.17467e-09	13.3869
LOC643821	2.03087	3.27738	6.95891	1.96097e-10	3.1812e-09	13.3843
LOC642106	1.98192	3.31037	6.95817	1.96834e-10	3.19007e-09	13.3807
GTSF1L	0.979234	3.01183	6.95813	1.96868e-10	3.19007e-09	13.3805
FAM9A	2.29565	3.38772	6.95787	1.97128e-10	3.19246e-09	13.3792
C15ORF37	0.922195	2.96184	6.95776	1.97241e-10	3.19248e-09	13.3786
IFT74	1.18223	4.21121	6.95763	1.97371e-10	3.19278e-09	13.378
HS.537971	0.625311	3.06167	6.95746	1.97533e-10	3.19358e-09	13.3772
HS.111539	1.7709	3.46976	6.95705	1.97951e-10	3.19852e-09	13.3751
LOC285423	2.27041	3.44811	6.9569	1.98094e-10	3.19903e-09	13.3744
LOC653935	1.27789	3.11347	6.9561	1.98901e-10	3.20884e-09	13.3705
NDN	1.67976	6.4859	6.95607	1.98927e-10	3.20884e-09	13.3703
LOC650195	1.34745	3.23211	6.95574	1.99262e-10	3.21169e-09	13.3687
CSRNP3	0.949463	3.1371	6.95567	1.99329e-10	3.21169e-09	13.3684
PLEKHH1	0.545781	3.09253	6.95514	1.99863e-10	3.21847e-09	13.3658
HS.565708	1.30052	3.58079	6.95453	2.00486e-10	3.22669e-09	13.3627
LOC644241	2.46846	3.4599	6.95417	2.00851e-10	3.23072e-09	13.361
HSDL2	1.15291	4.47341	6.95392	2.01098e-10	3.23188e-09	13.3598
ARTN	1.59153	3.20067	6.95387	2.01149e-10	3.23188e-09	13.3595
SNORA64	-0.348219	3.36511	-6.95307	2.01963e-10	3.24313e-09	13.3556
MRPL49	0.74689	4.13115	6.95287	2.02171e-10	3.24463e-09	13.3546
HS.147496	1.47498	3.32384	6.95273	2.02311e-10	3.24506e-09	13.3539
SLC16A3	-1.95557	6.7231	-6.95255	2.02495e-10	3.24618e-09	13.353
HS.543654	1.25395	3.28514	6.95231	2.02748e-10	3.24666e-09	13.3518
MGC40069	0.868914	3.01175	6.9523	2.02753e-10	3.24666e-09	13.3518
HS.569718	1.57486	3.32442	6.95219	2.02871e-10	3.24674e-09	13.3512
LCE2D	0.650846	2.94656	6.95198	2.0308e-10	3.24825e-09	13.3502
BFSP1	1.12701	3.23097	6.95149	2.03582e-10	3.25436e-09	13.3478
ACAA1	1.40573	4.93337	6.95139	2.0369e-10	3.25436e-09	13.3473
LOC642815	-0.217233	3.22929	-6.95124	2.03842e-10	3.25497e-09	13.3466
LOC652568	1.89641	3.28193	6.95023	2.04881e-10	3.26901e-09	13.3416
SUPT7L	0.970355	3.14929	6.95006	2.05062e-10	3.26901e-09	13.3408
LOC391378	2.22531	3.29904	6.95005	2.05066e-10	3.26901e-09	13.3407
HS.129547	2.45243	3.59635	6.94989	2.05233e-10	3.26938e-09	13.34
GFPT2	-1.58762	4.71632	-6.94981	2.05318e-10	3.26938e-09	13.3396
LOC729837	1.3536	3.30754	6.94948	2.05661e-10	3.27135e-09	13.3379
LOC653968	1.32988	3.19149	6.94946	2.05682e-10	3.27135e-09	13.3378
SLC22A10	2.3843	3.47755	6.94936	2.05787e-10	3.27135e-09	13.3373
LOC643006	1.27318	3.10242	6.94921	2.05945e-10	3.27205e-09	13.3366
TMEM178	0.702882	3.52987	6.94877	2.06403e-10	3.27749e-09	13.3344
HS.545250	2.35113	3.4467	6.94815	2.07052e-10	3.28559e-09	13.3314
LOC645895	-1.79624	9.97635	-6.94806	2.07143e-10	3.28559e-09	13.3309
HS.542708	0.908808	3.19263	6.94753	2.077e-10	3.29258e-09	13.3283
CEBPE	0.882324	3.06112	6.94634	2.08948e-10	3.30909e-09	13.3225
C15ORF59	0.40115	3.26179	6.94632	2.08973e-10	3.30909e-09	13.3224
LOC647865	1.74953	3.14745	6.94565	2.09675e-10	3.31741e-09	13.3191
KCMF1	0.78307	3.59875	6.9456	2.09731e-10	3.31741e-09	13.3188
LOC728219	1.54649	3.13421	6.94508	2.10286e-10	3.32434e-09	13.3163
MRPS30	1.00965	4.63506	6.94446	2.10946e-10	3.3304e-09	13.3132
RAD54B	1.51765	3.5235	6.9444	2.11005e-10	3.3304e-09	13.3129
TRIP11	1.33635	4.55451	6.94437	2.11036e-10	3.3304e-09	13.3128
ZNF710	0.514157	2.79962	6.94421	2.1121e-10	3.3304e-09	13.312
DCST2	0.586857	2.86289	6.9441	2.11323e-10	3.3304e-09	13.3115
HMG20B	-1.23561	5.96298	-6.94406	2.1137e-10	3.3304e-09	13.3113
LOC649524	2.1393	3.30186	6.94338	2.12096e-10	3.33998e-09	13.3079
LY6G6F	2.46606	3.49187	6.94216	2.13406e-10	3.35874e-09	13.3019
HS.323190	2.31775	3.52542	6.94205	2.13523e-10	3.35874e-09	13.3014
ZSCAN1	1.24423	3.04089	6.94078	2.14899e-10	3.37853e-09	13.2951
LOC646906	0.970232	3.16543	6.94014	2.15591e-10	3.38753e-09	13.292
LOC641851	2.29791	3.42777	6.93979	2.15972e-10	3.39151e-09	13.2903
RGMA	0.981085	4.77097	6.93969	2.16082e-10	3.39151e-09	13.2898
RAB11B	1.03683	3.07246	6.93829	2.17613e-10	3.41366e-09	13.2829
LOC389120	2.12779	3.31703	6.93775	2.18203e-10	3.42104e-09	13.2803
HS.583132	1.63031	3.20257	6.93745	2.1854e-10	3.42444e-09	13.2788
LOC644347	1.03725	3.05691	6.93729	2.18718e-10	3.42462e-09	13.278
SPATC1	1.52823	3.51366	6.93722	2.18792e-10	3.42462e-09	13.2777
GCM1	2.45164	3.6093	6.93616	2.19968e-10	3.44113e-09	13.2724
LOC651177	1.41476	3.12054	6.93605	2.20092e-10	3.44118e-09	13.2719
HS.582845	1.73308	3.32755	6.93589	2.20261e-10	3.44195e-09	13.2711
SAMD12	0.32133	2.81309	6.93562	2.2057e-10	3.44488e-09	13.2698
SRD5A2	1.94265	3.39898	6.93526	2.20964e-10	3.44914e-09	13.268
RFPL1S	2.49611	3.40281	6.93514	2.21105e-10	3.44945e-09	13.2674
LOC644391	1.43355	3.35425	6.93492	2.21341e-10	3.45126e-09	13.2664
LOC644117	1.63605	3.36219	6.9346	2.21701e-10	3.45498e-09	13.2648
MGC10997	-1.53677	6.82865	-6.93376	2.2264e-10	3.46772e-09	13.2607
LPPR3	0.4262	2.81856	6.93358	2.22851e-10	3.4691e-09	13.2597
LOC651196	1.28824	3.19645	6.93337	2.23089e-10	3.47091e-09	13.2587
RPL18A	-2.15187	9.55604	-6.93307	2.23422e-10	3.47419e-09	13.2573
HS.565151	2.53305	3.48825	6.93261	2.23938e-10	3.48032e-09	13.255
HS.279472	1.07272	3.09159	6.93242	2.24156e-10	3.48181e-09	13.2541
HS.538761	1.01073	3.01964	6.93227	2.24324e-10	3.48253e-09	13.2533
EXD2	0.90921	4.35171	6.93198	2.24657e-10	3.48578e-09	13.2519
DDX26B	-0.462335	3.55547	-6.93147	2.2523e-10	3.49278e-09	13.2494
LOC654235	1.811	3.4166	6.93025	2.26619e-10	3.51241e-09	13.2434
NPTXR	0.515176	3.14886	6.93014	2.26749e-10	3.51251e-09	13.2429
LOC646855	1.41012	3.2782	6.92957	2.27402e-10	3.52071e-09	13.2401
RHBDL1	1.36939	3.3441	6.92945	2.27543e-10	3.52099e-09	13.2395
LOXL2	0.405433	2.83374	6.92929	2.27722e-10	3.52184e-09	13.2387
RPL3	-2.35609	9.07954	-6.92863	2.2848e-10	3.53164e-09	13.2355
LOC641846	2.336	3.3615	6.92776	2.29486e-10	3.54527e-09	13.2312
WDR17	2.19672	3.42787	6.92718	2.30161e-10	3.55378e-09	13.2283
OR10G8	0.454309	2.73663	6.9269	2.30482e-10	3.55681e-09	13.227
HS.525917	1.24559	3.26131	6.92665	2.30772e-10	3.55728e-09	13.2257
LOC643968	2.15391	3.30034	6.92664	2.30793e-10	3.55728e-09	13.2257
FER1L4	-1.44959	4.40502	-6.92655	2.30887e-10	3.55728e-09	13.2253
C11ORF71	1.16308	3.39183	6.92446	2.33341e-10	3.59315e-09	13.215
FAM164C	1.09954	3.19913	6.92286	2.35235e-10	3.62036e-09	13.2071
DKK4	0.520869	2.79123	6.92257	2.35574e-10	3.62313e-09	13.2057
LOC652471	1.13265	3.0516	6.92249	2.3567e-10	3.62313e-09	13.2053
NFKBID	-0.371015	3.38784	-6.92165	2.36674e-10	3.63662e-09	13.2011
RFK	-0.261692	3.24376	-6.92133	2.37056e-10	3.64053e-09	13.1996
LOC128102	1.26982	3.13191	6.92102	2.37418e-10	3.64412e-09	13.1981
FBXO15	1.96491	3.55072	6.92057	2.37956e-10	3.6504e-09	13.1959
C1ORF226	1.5634	3.33769	6.9204	2.38166e-10	3.65167e-09	13.195
FKTN	-2.42936	9.33908	-6.91932	2.39467e-10	3.66846e-09	13.1897
C19ORF45	1.38357	3.16785	6.91928	2.39519e-10	3.66846e-09	13.1895
LOC645066	1.46595	3.13869	6.9184	2.40576e-10	3.68267e-09	13.1852
ALDH8A1	-0.338264	3.42148	-6.91755	2.41611e-10	3.69654e-09	13.181
FNBP4	-1.45438	6.11409	-6.91718	2.42066e-10	3.7015e-09	13.1792
HS.577861	1.73699	3.42357	6.91645	2.4296e-10	3.71319e-09	13.1756
OR9G1	1.21724	3.15516	6.91598	2.43528e-10	3.71987e-09	13.1733
OTOP2	0.84266	2.90959	6.91535	2.44309e-10	3.7298e-09	13.1702
FBXO40	0.38697	2.75711	6.91519	2.44505e-10	3.73079e-09	13.1694
THTPA	0.345153	3.06084	6.91488	2.44887e-10	3.73265e-09	13.1679
CHAF1B	0.743445	3.26949	6.91488	2.44888e-10	3.73265e-09	13.1679
HS.543951	1.97269	3.45405	6.91352	2.4657e-10	3.75591e-09	13.1613
HS.569270	2.27411	3.44261	6.91343	2.46678e-10	3.75591e-09	13.1608
ADCYAP1R1	0.593383	2.85149	6.91246	2.47891e-10	3.77237e-09	13.1561
HS.544557	1.85394	3.3332	6.91179	2.48726e-10	3.78305e-09	13.1528
SULT4A1	2.26765	3.30177	6.91161	2.48952e-10	3.78448e-09	13.1519
LOC642160	1.15024	3.11111	6.91002	2.50962e-10	3.81299e-09	13.1441
KCNQ1DN	1.75987	3.27022	6.90979	2.51242e-10	3.81521e-09	13.143
LOC653941	2.34193	3.44853	6.90864	2.52708e-10	3.83458e-09	13.1373
HCST	-1.8554	6.64392	-6.90858	2.52787e-10	3.83458e-09	13.137
C9ORF80	-2.18819	8.8599	-6.90817	2.53307e-10	3.84044e-09	13.135
GPR128	1.82469	3.43456	6.90763	2.53991e-10	3.84876e-09	13.1324
PMCH	1.68696	3.19016	6.90701	2.54794e-10	3.85697e-09	13.1293
LOC647841	1.81525	3.28266	6.907	2.54804e-10	3.85697e-09	13.1293
MS4A15	0.281185	2.78563	6.90679	2.55068e-10	3.85891e-09	13.1283
CARS2	-0.817599	4.26445	-6.90665	2.55258e-10	3.85974e-09	13.1275
CTSW	1.71036	3.83904	6.90652	2.55419e-10	3.86013e-09	13.1269
KCNQ5	2.25982	3.37408	6.90614	2.55911e-10	3.86551e-09	13.1251
SH2B3	-1.6248	6.17964	-6.90592	2.56199e-10	3.86781e-09	13.124
KLRA1	1.10787	3.28036	6.90573	2.56442e-10	3.86944e-09	13.123
CA14	0.374384	2.83307	6.90533	2.56951e-10	3.87507e-09	13.1211
TADA2A	0.904537	3.25455	6.90465	2.57837e-10	3.88637e-09	13.1178
SHANK3	-1.48097	6.20115	-6.90438	2.58183e-10	3.88753e-09	13.1164
C21ORF88	0.912806	3.04258	6.90431	2.58281e-10	3.88753e-09	13.1161
C14ORF50	1.04347	3.06533	6.90428	2.58323e-10	3.88753e-09	13.1159
OR1G1	0.382254	2.81044	6.90386	2.58873e-10	3.89375e-09	13.1138
LOC642434	1.36737	3.14206	6.9037	2.59075e-10	3.89473e-09	13.1131
METTL2B	0.968472	3.17307	6.90348	2.59362e-10	3.89514e-09	13.112
LOC646853	2.35794	3.60245	6.90347	2.59375e-10	3.89514e-09	13.112
LOC643009	2.4633	3.46298	6.90295	2.60052e-10	3.9013e-09	13.1094
LOC729396	1.53475	3.19851	6.90295	2.60059e-10	3.9013e-09	13.1094
ZC3H3	-0.887059	4.7511	-6.90279	2.60261e-10	3.90228e-09	13.1086
SFTPA2	0.806781	2.91501	6.90266	2.6044e-10	3.90291e-09	13.108
HS3ST1	0.99813	3.48712	6.90158	2.61857e-10	3.92187e-09	13.1027
RPS10	-2.32056	9.56446	-6.90149	2.61981e-10	3.92187e-09	13.1022
EMR1	1.34653	3.12538	6.90064	2.631e-10	3.93655e-09	13.0981
LOC653582	1.27233	3.07791	6.89972	2.6432e-10	3.95274e-09	13.0936
HS.566930	1.92896	3.36297	6.89936	2.64797e-10	3.95779e-09	13.0918
SMOC1	1.01091	3.52787	6.89922	2.64982e-10	3.95784e-09	13.0911
HS.570237	1.73406	3.3586	6.89915	2.65078e-10	3.95784e-09	13.0908
HS.201441	1.65633	3.27662	6.89874	2.65627e-10	3.96396e-09	13.0888
LOC202134	1.55761	3.47833	6.89844	2.66025e-10	3.96782e-09	13.0873
HS.545074	2.34541	3.69992	6.89821	2.66344e-10	3.97051e-09	13.0861
LOC646554	1.85157	3.29032	6.89798	2.66646e-10	3.97293e-09	13.085
LILRB1	-1.83631	9.01634	-6.8978	2.66892e-10	3.97334e-09	13.0841
EDN1	1.2315	4.22293	6.89775	2.66952e-10	3.97334e-09	13.0839
C14ORF70	1.10833	3.07717	6.89712	2.678e-10	3.98387e-09	13.0808
LOC653257	2.03112	3.39346	6.89661	2.68486e-10	3.992e-09	13.0783
GRXCR2	1.35331	3.15134	6.89642	2.68746e-10	3.99378e-09	13.0774
HS.135050	2.3367	3.50744	6.89517	2.7045e-10	4.017e-09	13.0712
KCTD19	1.57799	3.1954	6.89477	2.70989e-10	4.02292e-09	13.0693
LOC645465	1.68499	3.32278	6.8943	2.71636e-10	4.03043e-09	13.067
STELLAR	2.3716	3.4369	6.89341	2.72851e-10	4.04629e-09	13.0626
TCP10L2	1.01135	3.01165	6.89331	2.72989e-10	4.04629e-09	13.0621
HS.544242	1.52153	3.34867	6.89311	2.73271e-10	4.04835e-09	13.0611
TCBA1	0.60875	2.9016	6.89291	2.73535e-10	4.05017e-09	13.0602
LOC647571	1.42134	3.1481	6.89231	2.74367e-10	4.06037e-09	13.0572
PTPRQ	1.21039	3.25369	6.89169	2.75222e-10	4.07091e-09	13.0542
CNTNAP5	0.573028	3.15059	6.89127	2.75808e-10	4.07727e-09	13.0521
LOC441548	1.46611	3.15803	6.89118	2.75938e-10	4.07727e-09	13.0517
LOC646463	0.886312	4.04181	6.89088	2.76346e-10	4.08078e-09	13.0503
POU3F4	0.499359	2.91767	6.89073	2.7656e-10	4.08078e-09	13.0495
FTL	-2.61979	9.81635	-6.8907	2.76605e-10	4.08078e-09	13.0493
SPANXE	2.0069	3.35152	6.89023	2.77255e-10	4.08715e-09	13.0471
INSIG1	-1.5038	5.61139	-6.89018	2.77324e-10	4.08715e-09	13.0468
LOC650167	2.23655	3.40841	6.88939	2.78435e-10	4.10028e-09	13.0429
LOC441208	1.56285	3.35546	6.88924	2.78642e-10	4.10028e-09	13.0422
LOC400456	1.54381	3.27944	6.88924	2.78646e-10	4.10028e-09	13.0422
B3GAT2	0.735925	2.85317	6.88908	2.78858e-10	4.10129e-09	13.0414
ASZ1	1.61195	3.23106	6.88856	2.79592e-10	4.10996e-09	13.0389
HS.582099	1.45234	3.13864	6.8875	2.81089e-10	4.12984e-09	13.0337
CRYM	1.02044	3.42473	6.8873	2.81367e-10	4.13179e-09	13.0327
C9ORF91	1.13475	3.94102	6.88704	2.81738e-10	4.13511e-09	13.0314
MGC40499	2.40949	3.4974	6.88684	2.82026e-10	4.1372e-09	13.0304
RDH12	0.529372	2.86249	6.88662	2.82336e-10	4.13962e-09	13.0294
LOC642280	0.926827	3.07694	6.88632	2.82761e-10	4.14372e-09	13.0279
ANUBL1	0.39471	2.91396	6.88578	2.83535e-10	4.15293e-09	13.0252
C4ORF26	0.823927	2.96109	6.88532	2.84188e-10	4.16035e-09	13.023
LIMK2	1.99331	3.67884	6.88388	2.86251e-10	4.1884e-09	13.016
LOC643841	0.76091	3.27132	6.88349	2.86815e-10	4.1945e-09	13.014
IQUB	0.877324	3.07343	6.88321	2.87226e-10	4.19835e-09	13.0127
LOC392425	1.61978	3.21866	6.88308	2.87418e-10	4.19902e-09	13.012
LOC732387	1.28849	3.18416	6.88265	2.8803e-10	4.20579e-09	13.0099
LOC652369	1.33697	3.14433	6.88227	2.88587e-10	4.21178e-09	13.008
LOC642669	1.99849	3.2923	6.8821	2.88826e-10	4.2121e-09	13.0072
LOC199800	1.32208	3.89921	6.88205	2.88905e-10	4.2121e-09	13.007
HS.18849	1.4036	3.54535	6.88195	2.89054e-10	4.21212e-09	13.0065
FLJ42133	0.51036	2.84187	6.88157	2.89609e-10	4.21805e-09	13.0046
LOC642468	-0.278011	3.41889	-6.88142	2.89821e-10	4.21898e-09	13.0039
SLC13A1	1.35631	3.22783	6.88057	2.91065e-10	4.2328e-09	12.9997
LOC643749	1.51724	3.18869	6.88057	2.91067e-10	4.2328e-09	12.9997
ZFYVE9	0.602992	3.09098	6.88039	2.91323e-10	4.23436e-09	12.9989
LOC644964	1.28968	3.14544	6.88025	2.9154e-10	4.23535e-09	12.9981
OR4B1	2.22735	3.43811	6.87959	2.92495e-10	4.24707e-09	12.995
HS.542384	0.973333	3.22845	6.87766	2.95356e-10	4.28642e-09	12.9855
OR8D1	0.629371	2.90264	6.87678	2.96671e-10	4.30332e-09	12.9812
LOC646976	1.0161	3.09288	6.87645	2.97159e-10	4.3082e-09	12.9796
SCLY	1.03774	3.50048	6.87631	2.9737e-10	4.30907e-09	12.9789
OR4K2	1.63109	3.23344	6.8754	2.98738e-10	4.32669e-09	12.9744
HS.571406	1.26919	3.21913	6.87468	2.99819e-10	4.34014e-09	12.9709
VCAM1	-2.12413	7.20677	-6.8737	3.01296e-10	4.35931e-09	12.9661
LOC653528	1.06867	3.05354	6.87353	3.01552e-10	4.3608e-09	12.9653
INSM2	0.759887	2.8802	6.87329	3.01923e-10	4.36396e-09	12.9641
HUS1B	-0.355763	3.45003	-6.87294	3.02446e-10	4.36741e-09	12.9624
CCDC78	0.652133	2.88895	6.87293	3.02469e-10	4.36741e-09	12.9623
MBL2	0.658981	2.84776	6.87273	3.02769e-10	4.36953e-09	12.9613
HS.436863	1.13196	3.20528	6.87258	3.03e-10	4.37066e-09	12.9606
WFDC13	1.64497	3.23073	6.87246	3.03186e-10	4.37112e-09	12.96
LOC647337	1.74523	3.24384	6.872	3.03882e-10	4.37894e-09	12.9578
LOC647920	1.71967	3.38344	6.8717	3.04335e-10	4.38177e-09	12.9563
KIR3DP1	0.62063	3.02276	6.87167	3.04386e-10	4.38177e-09	12.9562
ERCC6	2.4103	3.6287	6.87053	3.06142e-10	4.40482e-09	12.9506
C20ORF112	1.61204	3.30953	6.86937	3.07931e-10	4.42575e-09	12.9449
HS.552799	0.572661	3.59638	6.86931	3.08013e-10	4.42575e-09	12.9446
CLRN1	0.594721	3.48482	6.86928	3.08062e-10	4.42575e-09	12.9445
REXO4	0.842258	4.64496	6.86811	3.09881e-10	4.44964e-09	12.9387
LOC644841	0.762259	3.0481	6.86797	3.10095e-10	4.45047e-09	12.9381
LOC732425	0.493837	3.63563	6.86751	3.10827e-10	4.45873e-09	12.9358
HS.545094	1.65303	3.24581	6.8667	3.12085e-10	4.47452e-09	12.9318
LOC728302	1.35507	3.14961	6.86617	3.12915e-10	4.48198e-09	12.9293
LOC642672	1.55054	3.27926	6.86617	3.12919e-10	4.48198e-09	12.9292
SLCO1A2	2.0098	3.31911	6.86582	3.13463e-10	4.48341e-09	12.9275
ACP1	1.35868	5.06773	6.86578	3.13539e-10	4.48341e-09	12.9273
LOC642362	2.00747	3.3616	6.86577	3.1355e-10	4.48341e-09	12.9273
BFSP2	1.31159	3.17971	6.86571	3.13648e-10	4.48341e-09	12.927
TMED2	1.82964	6.64967	6.86485	3.15009e-10	4.5006e-09	12.9228
HS.543153	1.89362	3.43964	6.86454	3.15488e-10	4.50425e-09	12.9213
FOXN1	1.6199	3.22129	6.86449	3.1558e-10	4.50425e-09	12.921
HS.554965	0.691413	3.28856	6.86431	3.15858e-10	4.50596e-09	12.9201
HS.545551	1.69331	3.45882	6.86413	3.16137e-10	4.50717e-09	12.9193
[truncated: 26,504 more rows]

## Sheet: Annotation
ID	Gene symbol
logFC	Log2-fold change between two experimental conditions
AveExpr	Average expression of gene symbol
t	Moderated t-statistic
P.Value	Raw P-value
adj.P.Val	P-value after adjustment for multiple testing
B	B-statistic or log-odds that the gene is differentially expressed
