# Supplementary material for: Integrated analysis and the identification of a circRNA-miRNA-mRNA network in the progression of abdominal aortic aneurysm
Source: PeerJ. 2021 Dec 24;9:e12682. doi: 10.7717/peerj.12682 (PMC8711282; doi:10.7717/peerj.12682)
Supplement: Supplemental Information 11 [file peerj-09-12682-s011.xlsx]

## Sheet: CC-functional annotation chart
Category	Term		PValue	Count
GOTERM_CC_DIRECT	GO:0005615~extracellular space	extracellular space	0.000272208	19
GOTERM_CC_DIRECT	GO:0009897~external side of plasma membrane	external side of plasma membrane	0.00586968	6
GOTERM_CC_DIRECT	GO:0005829~cytosol	cytosol	0.0144473	28
GOTERM_CC_DIRECT	GO:0005589~collagen type VI trimer	collagen type VI trimer	0.0160469	2
GOTERM_CC_DIRECT	GO:0005853~eukaryotic translation elongation factor 1 complex	eukaryotic translation elongation factor 1 complex	0.021339	2
GOTERM_CC_DIRECT	GO:0031012~extracellular matrix	extracellular matrix	0.0218199	6
GOTERM_CC_DIRECT	GO:0070062~extracellular exosome	extracellular exosome	0.0415504	23
GOTERM_CC_DIRECT	GO:0008541~proteasome regulatory particle, lid subcomplex	proteasome regulatory particle, lid subcomplex	0.0422271	2
