# Supplementary material for: Integrated analysis and the identification of a circRNA-miRNA-mRNA network in the progression of abdominal aortic aneurysm
Source: PeerJ. 2021 Dec 24;9:e12682. doi: 10.7717/peerj.12682 (PMC8711282; doi:10.7717/peerj.12682)
Supplement: Supplemental Information 13 [file peerj-09-12682-s013.xlsx]

## Sheet: Sheet1
ID	logFC	AveExpr	t	P.Value	adj.P.Val	B
hsa_circRNA_406918	1.86313	11.4644	10.7518	3.06209e-06	0.0407105	4.34006
hsa_circRNA_037128	1.0436	12.6979	9.23033	1.02149e-05	0.0679034	3.50065
hsa_circRNA_100566	1.05674	6.56037	8.39311	2.13278e-05	0.0945177	2.94716
hsa_circRNA_101820	0.976543	10.2524	7.47355	5.142e-05	0.0949477	2.24883
hsa_circRNA_005073	-2.63757	9.74989	-7.23848	6.52586e-05	0.0949477	2.05335
hsa_circRNA_401725	-1.6511	8.01911	-7.14596	7.17915e-05	0.0949477	1.97438
hsa_circRNA_101854	-1.73526	8.27109	-7.04351	7.98769e-05	0.0949477	1.88558
hsa_circRNA_103147	0.893426	7.40971	6.84438	9.86165e-05	0.0949477	1.70877
hsa_circRNA_044885	-1.76087	9.8366	-6.74334	0.000109933	0.0949477	1.6169
hsa_circRNA_011449	-0.765451	6.00607	-6.73703	0.000110686	0.0949477	1.61112
hsa_circRNA_104469	-1.46142	9.91153	-6.73455	0.000110984	0.0949477	1.60884
hsa_circRNA_405247	1.08916	7.11357	6.69832	0.00011543	0.0949477	1.57549
hsa_circRNA_101797	1.00397	5.69168	6.61999	0.000125727	0.0949477	1.50273
hsa_circRNA_103645	1.26356	6.53654	6.51126	0.000141728	0.0949477	1.40022
hsa_circRNA_102455	-1.15758	7.73384	-6.50953	0.000141999	0.0949477	1.39858
hsa_circRNA_000996	-1.35189	8.31523	-6.50326	0.00014299	0.0949477	1.39261
hsa_circRNA_100896	1.01645	7.59815	6.49807	0.000143817	0.0949477	1.38766
hsa_circRNA_104468	-1.85774	9.59289	-6.36964	0.000166012	0.0949477	1.26404
hsa_circRNA_104533	1.89259	5.98362	6.33134	0.000173339	0.0949477	1.22669
hsa_circRNA_007418	-1.92321	8.36242	-6.31417	0.000176739	0.0949477	1.20987
hsa_circRNA_100631	1.15308	10.6951	6.26382	0.000187136	0.0949477	1.16028
hsa_circRNA_103415	1.0489	8.216	6.24996	0.000190114	0.0949477	1.14657
hsa_circRNA_081968	-1.3107	8.3258	-6.24691	0.000190775	0.0949477	1.14355
hsa_circRNA_058934	-1.14545	7.83419	-6.2006	0.00020115	0.0949477	1.09747
hsa_circRNA_100347	1.00969	6.59291	6.17215	0.000207827	0.0949477	1.069
hsa_circRNA_000860	0.686113	6.07125	6.13481	0.000216964	0.0949477	1.03143
hsa_circRNA_104149	-1.17225	6.96181	-6.13368	0.000217247	0.0949477	1.03029
hsa_circRNA_102167	-0.894553	9.81536	-6.09534	0.000227101	0.0949477	0.991488
hsa_circRNA_400840	-0.987669	6.09915	-6.0668	0.000234753	0.0949477	0.962455
hsa_circRNA_103509	0.98716	6.62818	6.05626	0.00023765	0.0949477	0.951698
hsa_circRNA_007720	-1.07369	5.89212	-5.97444	0.000261518	0.0949477	0.867597
hsa_circRNA_003057	0.996332	9.25938	5.96867	0.000263298	0.0949477	0.861624
hsa_circRNA_102299	-1.57407	10.5285	-5.95737	0.000266824	0.0949477	0.849906
hsa_circRNA_104435	1.10454	8.60491	5.93165	0.000275036	0.0949477	0.823181
hsa_circRNA_006963	1.13061	7.11251	5.89617	0.000286824	0.0949477	0.786129
hsa_circRNA_104237	0.688533	6.45643	5.86182	0.000298765	0.0949477	0.750062
hsa_circRNA_002124	1.24666	10.8996	5.85314	0.000301868	0.0949477	0.740916
hsa_circRNA_105035	1.203	7.64248	5.84482	0.000304872	0.0949477	0.732148
hsa_circRNA_401015	-0.862644	7.02006	-5.82295	0.000312933	0.0949477	0.709025
hsa_circRNA_104639	-1.41691	7.24018	-5.81054	0.000317611	0.0949477	0.69587
hsa_circRNA_002988	1.05839	5.53977	5.76846	0.000334051	0.0949477	0.651068
hsa_circRNA_406445	-0.723513	8.57198	-5.76675	0.000334739	0.0949477	0.649239
hsa_circRNA_403150	0.774182	7.25746	5.76117	0.000336994	0.0949477	0.643273
hsa_circRNA_004299	-1.21483	8.00626	-5.7589	0.000337914	0.0949477	0.640848
hsa_circRNA_004466	0.79936	12.002	5.74541	0.000343449	0.0949477	0.626401
hsa_circRNA_011538	0.774704	7.40114	5.742	0.000344862	0.0949477	0.622747
hsa_circRNA_051077	1.29239	6.45831	5.73577	0.000347464	0.0949477	0.616062
hsa_circRNA_404890	0.728461	10.0616	5.70562	0.000360351	0.0949477	0.583632
hsa_circRNA_008267	1.59477	6.5621	5.69292	0.00036594	0.0949477	0.569916
hsa_circRNA_002141	0.828729	7.1181	5.65998	0.000380871	0.0949477	0.534239
hsa_circRNA_405527	0.903055	9.47634	5.62679	0.000396592	0.0949477	0.498105
hsa_circRNA_102887	-2.40486	13.2424	-5.60122	0.000409189	0.0949477	0.470134
hsa_circRNA_103081	-1.22993	8.60589	-5.59713	0.000411245	0.0949477	0.465648
hsa_circRNA_104713	-0.645805	6.33022	-5.55095	0.000435239	0.0949477	0.414839
hsa_circRNA_083182	-1.14882	6.89723	-5.54422	0.000438862	0.0949477	0.407404
hsa_circRNA_055953	1.16903	8.05052	5.52142	0.000451383	0.0949477	0.382156
hsa_circRNA_405022	-0.697324	6.74277	-5.52016	0.000452087	0.0949477	0.380756
hsa_circRNA_104728	-1.96681	12.2981	-5.49712	0.000465158	0.0949477	0.355148
hsa_circRNA_102760	-0.896122	6.14308	-5.49485	0.000466466	0.0949477	0.352624
hsa_circRNA_103646	1.11209	5.52772	5.49293	0.000467577	0.0949477	0.350486
hsa_circRNA_101895	-1.14619	8.34651	-5.48933	0.000469667	0.0949477	0.346477
hsa_circRNA_407103	-0.851773	7.49089	-5.47084	0.000480569	0.0949477	0.325836
hsa_circRNA_102687	1.03013	7.95732	5.46574	0.000483623	0.0949477	0.320135
hsa_circRNA_401999	-1.4036	9.78765	-5.46298	0.000485284	0.0949477	0.31705
hsa_circRNA_101979	-0.556289	6.415	-5.45714	0.000488824	0.0949477	0.310507
hsa_circRNA_101049	-0.825258	6.54219	-5.42727	0.000507362	0.0949477	0.276975
hsa_circRNA_103168	0.925728	6.13765	5.40065	0.00052453	0.0949477	0.246963
hsa_circRNA_007343	0.828172	7.57913	5.38941	0.000531964	0.0949477	0.234261
hsa_circRNA_104603	0.841347	6.57022	5.38582	0.000534369	0.0949477	0.230189
hsa_circRNA_077398	-0.915603	8.94346	-5.3836	0.000535859	0.0949477	0.227674
hsa_circRNA_403832	0.946562	8.01136	5.37599	0.000541	0.0949477	0.219051
hsa_circRNA_405005	-1.94649	9.57084	-5.37066	0.000544631	0.0949477	0.213008
hsa_circRNA_009554	-0.964017	5.74036	-5.36769	0.000546664	0.0949477	0.209643
hsa_circRNA_100004	-1.60186	9.51128	-5.34566	0.000562027	0.0949477	0.18459
hsa_circRNA_084963	-0.805489	5.50668	-5.34333	0.000563683	0.0949477	0.181929
hsa_circRNA_105029	0.586782	6.17733	5.33089	0.000572593	0.0949477	0.167742
hsa_circRNA_406007	-1.72331	9.99023	-5.32835	0.00057443	0.0949477	0.164844
hsa_circRNA_074559	-1.84143	11.5744	-5.32069	0.000580011	0.0949477	0.156093
hsa_circRNA_002134	-0.971667	7.87077	-5.31572	0.000583663	0.0949477	0.150411
hsa_circRNA_404593	0.629673	6.43682	5.30672	0.000590342	0.0949477	0.140107
hsa_circRNA_101800	-1.60157	8.94574	-5.29543	0.000598838	0.0949477	0.127163
hsa_circRNA_103122	-1.03498	7.2406	-5.28066	0.00061016	0.0949477	0.110188
hsa_circRNA_104972	-1.83372	7.58131	-5.27842	0.000611892	0.0949477	0.107617
hsa_circRNA_091053	-0.805783	7.52471	-5.27046	0.000618112	0.0949477	0.0984462
hsa_circRNA_101682	0.740635	6.36371	5.2612	0.000625424	0.0949477	0.087779
hsa_circRNA_004070	0.876763	6.47476	5.24889	0.000635296	0.0949477	0.0735675
hsa_circRNA_101263	-0.696124	6.91674	-5.23499	0.000646649	0.0949477	0.0574852
hsa_circRNA_103083	-0.591589	7.93931	-5.23034	0.000650496	0.0949477	0.0520976
hsa_circRNA_045308	-0.873155	9.56982	-5.21637	0.000662202	0.0949477	0.0358936
hsa_circRNA_006691	-1.83407	11.2115	-5.21586	0.000662633	0.0949477	0.0353018
hsa_circRNA_102735	-1.14208	8.72381	-5.2083	0.000669073	0.0949477	0.0265104
hsa_circRNA_001589	0.826371	5.85459	5.1945	0.000680989	0.0949477	0.0104582
hsa_circRNA_404211	-1.03461	8.46477	-5.19322	0.000682113	0.0949477	0.00895886
hsa_circRNA_087352	0.638001	7.64364	5.18219	0.000691823	0.0949477	-0.00390099
hsa_circRNA_406499	-1.1877	8.12486	-5.17742	0.000696065	0.0949477	-0.00946381
hsa_circRNA_008912	-1.98911	9.36511	-5.17662	0.00069678	0.0949477	-0.010399
hsa_circRNA_100666	0.822274	7.72534	5.17569	0.00069761	0.0949477	-0.0114824
hsa_circRNA_100621	-1.82509	9.373	-5.17317	0.000699878	0.0949477	-0.0144365
hsa_circRNA_400062	-2.8589	11.804	-5.14812	0.000722781	0.0956806	-0.0437612
hsa_circRNA_104475	-1.65751	10.7933	-5.14126	0.000729191	0.0956806	-0.0518062
hsa_circRNA_031900	1.48473	8.91883	5.14053	0.000729883	0.0956806	-0.052671
hsa_circRNA_043397	-0.797018	6.31091	-5.12293	0.00074664	0.0956806	-0.0733644
hsa_circRNA_103686	-1.51425	8.60972	-5.11191	0.000757342	0.0956806	-0.0863457
hsa_circRNA_407109	-1.44224	8.92674	-5.10764	0.000761532	0.0956806	-0.0913802
hsa_circRNA_404464	-0.822496	8.43631	-5.10738	0.000761789	0.0956806	-0.0916882
hsa_circRNA_100637	1.70676	9.93097	5.10026	0.000768845	0.0956806	-0.100102
hsa_circRNA_100434	1.0149	5.84902	5.09904	0.00077005	0.0956806	-0.101531
hsa_circRNA_017667	0.761147	6.82846	5.06678	0.000802953	0.0980388	-0.139743
hsa_circRNA_088744	0.907276	9.95	5.06599	0.000803778	0.0980388	-0.140681
hsa_circRNA_103701	-0.742969	7.01341	-5.04661	0.000824287	0.0986336	-0.163713
hsa_circRNA_092573	0.997113	7.21485	5.04322	0.000827942	0.0986336	-0.167759
hsa_circRNA_003813	0.746819	9.98409	5.04047	0.000830911	0.0986336	-0.171033
hsa_circRNA_056530	-1.69565	9.27764	-5.00447	0.000870886	0.101548	-0.214039
hsa_circRNA_001881	-1.43902	6.57694	-5.00356	0.000871926	0.101548	-0.215132
hsa_circRNA_400244	0.700698	5.84437	4.99793	0.000878375	0.101548	-0.221881
hsa_circRNA_104385	1.26426	6.29426	4.98286	0.000895885	0.102577	-0.239966
hsa_circRNA_407199	-0.788576	10.2334	-4.97478	0.000905427	0.102577	-0.249677
hsa_circRNA_029975	0.768278	6.93248	4.96673	0.00091505	0.102577	-0.259371
hsa_circRNA_004417	1.15949	7.17269	4.96416	0.000918142	0.102577	-0.262464
hsa_circRNA_402346	0.787194	8.48834	4.95137	0.00093371	0.102932	-0.277888
hsa_circRNA_407209	-0.865252	8.09257	-4.94612	0.000940182	0.102932	-0.284226
hsa_circRNA_103342	0.666235	7.65592	4.94261	0.00094454	0.102932	-0.28847
hsa_circRNA_100027	-1.71783	10.3646	-4.92616	0.000965242	0.103484	-0.308373
hsa_circRNA_407303	-0.784231	9.03026	-4.92348	0.000968657	0.103484	-0.311616
hsa_circRNA_020076	-1.53399	7.03497	-4.91288	0.000982319	0.103484	-0.32448
hsa_circRNA_075881	-0.844459	7.30333	-4.91058	0.000985308	0.103484	-0.327272
hsa_circRNA_000671	-1.22208	7.00879	-4.90181	0.000996796	0.103484	-0.337924
hsa_circRNA_104763	0.713455	8.60448	4.8964	0.00100395	0.103484	-0.344497
hsa_circRNA_049055	-0.780757	8.27063	-4.88002	0.00102597	0.103484	-0.364449
hsa_circRNA_104221	-2.22267	8.66436	-4.86649	0.00104457	0.103484	-0.380973
hsa_circRNA_026813	-1.27976	11.6572	-4.85574	0.00105959	0.103484	-0.394111
hsa_circRNA_101834	-1.72745	8.84964	-4.85213	0.00106469	0.103484	-0.398531
hsa_circRNA_406871	0.55832	5.63658	4.84961	0.00106826	0.103484	-0.401611
hsa_circRNA_405390	-0.616143	7.80019	-4.84951	0.0010684	0.103484	-0.401736
hsa_circRNA_000807	0.542308	6.60303	4.84783	0.0010708	0.103484	-0.403795
hsa_circRNA_407287	-0.88267	8.10637	-4.84686	0.00107217	0.103484	-0.404979
hsa_circRNA_052258	-0.948458	7.25301	-4.81678	0.00111605	0.103484	-0.441922
hsa_circRNA_090069	-2.5822	10.6155	-4.81526	0.00111831	0.103484	-0.443788
hsa_circRNA_065926	-1.431	8.61699	-4.81521	0.00111838	0.103484	-0.443847
hsa_circRNA_102349	-0.568191	6.49743	-4.81088	0.00112487	0.103484	-0.449176
hsa_circRNA_092516	-1.34845	11.0461	-4.80875	0.00112807	0.103484	-0.451799
hsa_circRNA_102567	1.46104	7.26557	4.80207	0.0011382	0.103484	-0.46004
hsa_circRNA_104057	1.0263	5.89933	4.79969	0.00114183	0.103484	-0.462972
hsa_circRNA_007698	-1.45175	8.51151	-4.79802	0.00114437	0.103484	-0.465025
hsa_circRNA_000186	-0.80862	8.01148	-4.79566	0.00114799	0.103484	-0.467938
hsa_circRNA_402644	-0.737335	5.50827	-4.7913	0.00115471	0.103484	-0.47332
hsa_circRNA_045361	-1.256	8.16772	-4.78158	0.00116985	0.103484	-0.485337
hsa_circRNA_005585	-0.930938	6.58575	-4.77768	0.00117598	0.103484	-0.490159
hsa_circRNA_038815	-0.703702	8.0489	-4.77372	0.00118224	0.103484	-0.495055
hsa_circRNA_046157	-0.616429	6.09874	-4.77282	0.00118367	0.103484	-0.496175
hsa_circRNA_400523	-0.661318	5.6035	-4.77077	0.00118694	0.103484	-0.498717
hsa_circRNA_100675	-1.54547	8.24043	-4.76083	0.00120287	0.103484	-0.511027
hsa_circRNA_006491	1.51841	6.66788	4.75495	0.00121241	0.103484	-0.518321
hsa_circRNA_405017	-1.0195	7.23703	-4.75466	0.00121289	0.103484	-0.518682
hsa_circRNA_102229	-0.796748	6.46618	-4.75093	0.00121899	0.103484	-0.523321
hsa_circRNA_005812	0.939661	5.45657	4.74136	0.00123478	0.103484	-0.535202
hsa_circRNA_055264	-1.19353	8.63191	-4.72863	0.00125614	0.103484	-0.551051
hsa_circRNA_405413	-0.859938	8.66284	-4.7242	0.00126367	0.103484	-0.556574
hsa_circRNA_008554	-2.02362	10.5832	-4.7147	0.00127996	0.103484	-0.568419
hsa_circRNA_405496	-0.812306	7.3943	-4.70927	0.00128938	0.103484	-0.575198
hsa_circRNA_002045	-0.757942	7.40845	-4.70725	0.0012929	0.103484	-0.577719
hsa_circRNA_014094	-2.01402	9.19861	-4.68838	0.00132633	0.103484	-0.601332
hsa_circRNA_002822	-0.724602	7.90437	-4.68756	0.00132781	0.103484	-0.602364
hsa_circRNA_404584	-0.803251	7.50291	-4.6849	0.0013326	0.103484	-0.605696
hsa_circRNA_100932	-0.923294	6.00425	-4.68206	0.00133774	0.103484	-0.609255
hsa_circRNA_100757	-0.686681	7.06962	-4.68185	0.00133811	0.103484	-0.609517
hsa_circRNA_100756	-0.472563	5.92587	-4.68077	0.00134006	0.103484	-0.610865
hsa_circRNA_103008	0.781323	6.96271	4.68058	0.00134042	0.103484	-0.61111
hsa_circRNA_103514	2.73659	7.5471	4.67728	0.00134643	0.103484	-0.615248
hsa_circRNA_000859	0.630864	6.00511	4.67438	0.00135174	0.103484	-0.618892
hsa_circRNA_053141	0.749123	6.61441	4.67404	0.00135235	0.103484	-0.619311
hsa_circRNA_404417	0.977442	7.97891	4.66973	0.00136028	0.103484	-0.624724
hsa_circRNA_100859	-0.64667	6.32895	-4.6696	0.00136052	0.103484	-0.624886
hsa_circRNA_103367	-0.694072	6.86722	-4.66865	0.00136228	0.103484	-0.626084
hsa_circRNA_403127	0.604151	6.62214	4.66708	0.00136517	0.103484	-0.628048
hsa_circRNA_102053	-1.77016	10.6567	-4.66144	0.00137566	0.103484	-0.635137
hsa_circRNA_401432	-1.91308	11.5248	-4.65672	0.00138451	0.103484	-0.641073
hsa_circRNA_102849	0.676195	6.7054	4.64769	0.00140161	0.103484	-0.652442
hsa_circRNA_004901	-0.741991	8.29439	-4.64671	0.00140349	0.103484	-0.653686
hsa_circRNA_047803	-0.985103	7.11117	-4.64132	0.00141381	0.103484	-0.660476
hsa_circRNA_102033	-1.3171	10.6651	-4.63976	0.00141682	0.103484	-0.662447
hsa_circRNA_003673	-1.26524	8.44352	-4.63122	0.00143339	0.103484	-0.673219
hsa_circRNA_000403	-0.969503	7.49196	-4.62887	0.00143799	0.103484	-0.676191
hsa_circRNA_101154	-0.979997	7.26163	-4.62009	0.00145529	0.103484	-0.687276
hsa_circRNA_104113	-1.28631	7.43322	-4.61893	0.0014576	0.103484	-0.688746
hsa_circRNA_103966	-0.603283	9.05491	-4.61886	0.00145774	0.103484	-0.688836
hsa_circRNA_001617	-0.692973	8.45652	-4.61478	0.00146588	0.103484	-0.693998
hsa_circRNA_009048	-0.924255	7.10327	-4.61385	0.00146773	0.103484	-0.69517
hsa_circRNA_102895	0.881912	8.95252	4.61171	0.00147203	0.103484	-0.69788
hsa_circRNA_101450	-1.23776	8.22956	-4.6083	0.0014789	0.103484	-0.702199
hsa_circRNA_102645	0.787304	7.74957	4.60104	0.00149365	0.103745	-0.711407
hsa_circRNA_078353	0.747058	6.16618	4.59457	0.00150691	0.103745	-0.719609
hsa_circRNA_035619	-0.542207	6.1111	-4.59421	0.00150766	0.103745	-0.720067
hsa_circRNA_103691	1.44044	8.36173	4.59122	0.00151384	0.103745	-0.723865
hsa_circRNA_092556	0.833418	6.39105	4.58232	0.00153238	0.104405	-0.735163
hsa_circRNA_103339	0.548297	8.29651	4.57463	0.00154861	0.104405	-0.744941
hsa_circRNA_406138	-0.678868	6.36216	-4.56869	0.00156128	0.104405	-0.752508
hsa_circRNA_066187	-0.858883	7.07737	-4.56659	0.00156578	0.104405	-0.755177
hsa_circRNA_092448	-0.747081	8.0879	-4.55999	0.00158003	0.104405	-0.763591
hsa_circRNA_101976	-1.27892	11.2121	-4.54883	0.00160442	0.104405	-0.777825
hsa_circRNA_404169	-0.785465	6.43378	-4.54813	0.00160597	0.104405	-0.778721
hsa_circRNA_406695	-0.748299	8.29202	-4.54581	0.0016111	0.104405	-0.78168
hsa_circRNA_103935	-0.775837	7.72224	-4.54572	0.00161131	0.104405	-0.781806
hsa_circRNA_405080	-1.88635	9.80952	-4.54484	0.00161326	0.104405	-0.782929
hsa_circRNA_103407	0.719319	7.62733	4.54	0.00162404	0.104405	-0.789115
hsa_circRNA_104824	-0.76389	8.21145	-4.52822	0.00165058	0.104405	-0.80418
hsa_circRNA_102809	-0.647155	7.20607	-4.52482	0.00165832	0.104405	-0.808531
hsa_circRNA_000006	-1.29742	7.0351	-4.51911	0.00167143	0.104405	-0.815855
hsa_circRNA_002491	-1.13081	7.61122	-4.51581	0.00167905	0.104405	-0.820083
hsa_circRNA_072303	-1.10628	7.91575	-4.51183	0.00168829	0.104405	-0.825185
hsa_circRNA_008685	-1.57388	8.71193	-4.50372	0.0017073	0.104405	-0.835601
hsa_circRNA_406213	-0.578314	5.59936	-4.49978	0.00171662	0.104405	-0.840664
hsa_circRNA_004868	1.65325	6.95601	4.49185	0.00173552	0.104405	-0.850854
hsa_circRNA_041698	0.954583	8.34244	4.48687	0.00174753	0.104405	-0.857273
hsa_circRNA_103378	-0.98261	6.91584	-4.48485	0.0017524	0.104405	-0.859863
hsa_circRNA_406452	-1.05933	8.45424	-4.48357	0.00175551	0.104405	-0.861512
hsa_circRNA_104195	0.901454	7.52092	4.48189	0.00175962	0.104405	-0.863687
hsa_circRNA_103229	-0.536511	6.30368	-4.4807	0.00176251	0.104405	-0.865213
hsa_circRNA_103291	-0.694033	7.31769	-4.47691	0.00177179	0.104405	-0.870105
hsa_circRNA_101836	2.10932	7.15662	4.47568	0.0017748	0.104405	-0.871684
hsa_circRNA_402842	-0.77518	5.68895	-4.47348	0.00178021	0.104405	-0.874515
hsa_circRNA_100421	0.858333	7.79717	4.47	0.00178882	0.104405	-0.879011
hsa_circRNA_012123	-1.18005	8.21807	-4.46963	0.00178975	0.104405	-0.879491
hsa_circRNA_102348	-0.64054	8.13081	-4.46809	0.00179357	0.104405	-0.881478
hsa_circRNA_405040	1.34966	6.82288	4.46785	0.00179416	0.104405	-0.881785
hsa_circRNA_101465	-1.3627	7.96486	-4.46048	0.00181259	0.104405	-0.891303
hsa_circRNA_101346	-1.38152	8.89355	-4.45824	0.00181822	0.104405	-0.894191
hsa_circRNA_104809	0.499624	6.23156	4.45403	0.00182888	0.104405	-0.899634
hsa_circRNA_102193	0.58736	5.46609	4.45381	0.00182944	0.104405	-0.899919
hsa_circRNA_406414	0.95728	6.3597	4.44961	0.00184014	0.104405	-0.905353
hsa_circRNA_032891	-1.38391	10.753	-4.44781	0.00184476	0.104405	-0.907689
hsa_circRNA_103544	-0.842178	9.53425	-4.4439	0.0018548	0.104405	-0.912745
hsa_circRNA_063313	-1.43924	8.00614	-4.43965	0.00186578	0.104405	-0.918247
hsa_circRNA_100563	0.889962	7.0557	4.43804	0.00186996	0.104405	-0.920332
hsa_circRNA_040680	-0.66258	6.85739	-4.43725	0.00187202	0.104405	-0.921357
hsa_circRNA_048584	-1.3905	8.55599	-4.4371	0.00187243	0.104405	-0.921558
hsa_circRNA_005493	0.670735	7.19373	4.4361	0.00187503	0.104405	-0.922851
hsa_circRNA_102438	-1.43527	9.23826	-4.4355	0.0018766	0.104405	-0.923632
hsa_circRNA_000285	-1.16186	9.98623	-4.43403	0.00188043	0.104405	-0.925532
hsa_circRNA_103628	1.22126	6.39751	4.4324	0.00188471	0.104405	-0.92765
hsa_circRNA_004210	0.825839	7.01932	4.42897	0.00189373	0.104469	-0.9321
hsa_circRNA_103930	-0.542239	6.36825	-4.42425	0.00190621	0.10457	-0.938223
hsa_circRNA_101145	-1.95375	10.3964	-4.41988	0.00191784	0.10457	-0.943894
hsa_circRNA_014239	0.601352	10.0617	4.41929	0.00191941	0.10457	-0.944659
hsa_circRNA_089660	-1.28738	6.73562	-4.41514	0.00193054	0.10457	-0.950049
hsa_circRNA_103196	0.560283	7.04492	4.40958	0.00194558	0.10457	-0.957283
hsa_circRNA_104387	0.802692	15.8719	4.40091	0.00196925	0.10457	-0.968562
hsa_circRNA_031845	-0.633046	6.77028	-4.39581	0.00198333	0.10457	-0.975211
hsa_circRNA_101835	0.931881	9.29935	4.39508	0.00198536	0.10457	-0.976162
hsa_circRNA_401953	0.669963	8.15841	4.39153	0.00199521	0.10457	-0.980781
hsa_circRNA_407175	-0.552996	8.05648	-4.39005	0.00199936	0.10457	-0.982719
hsa_circRNA_100691	-1.35022	8.70686	-4.38945	0.00200104	0.10457	-0.983503
hsa_circRNA_401116	-0.524479	5.88282	-4.38944	0.00200104	0.10457	-0.983505
hsa_circRNA_092373	-1.71573	10.5682	-4.38841	0.00200394	0.10457	-0.984855
hsa_circRNA_104584	-1.21207	8.29741	-4.38779	0.00200566	0.10457	-0.985657
hsa_circRNA_006187	0.806053	7.13604	4.38064	0.00202583	0.105208	-0.99499
hsa_circRNA_101636	0.984219	8.14129	4.37166	0.00205146	0.106125	-1.00673
hsa_circRNA_401622	-1.86049	9.13819	-4.36652	0.00206626	0.106477	-1.01344
hsa_circRNA_000570	-1.09131	6.95181	-4.36067	0.00208329	0.106705	-1.0211
hsa_circRNA_049948	-1.44133	11.0473	-4.35949	0.00208674	0.106705	-1.02264
hsa_circRNA_103073	-1.37715	9.09373	-4.35552	0.0020984	0.10689	-1.02785
hsa_circRNA_041782	-1.5412	8.54515	-4.34858	0.00211891	0.107523	-1.03693
hsa_circRNA_008676	-1.53915	10.4709	-4.34439	0.00213141	0.107627	-1.04243
hsa_circRNA_039934	0.574107	6.19247	4.34247	0.00213716	0.107627	-1.04494
hsa_circRNA_104056	1.16586	6.00132	4.33494	0.00215991	0.107651	-1.05483
hsa_circRNA_101062	1.47547	7.54216	4.32014	0.00220533	0.107651	-1.07428
hsa_circRNA_102173	-1.76362	11.0415	-4.31936	0.00220776	0.107651	-1.07531
hsa_circRNA_404411	0.510682	6.95653	4.31782	0.00221257	0.107651	-1.07734
hsa_circRNA_004074	0.690699	6.42168	4.31369	0.00222545	0.107651	-1.08277
hsa_circRNA_059550	-1.10487	9.16584	-4.31282	0.00222819	0.107651	-1.08392
hsa_circRNA_082275	-1.36858	6.75127	-4.305	0.00225289	0.107651	-1.09422
hsa_circRNA_402979	-0.661016	9.79839	-4.30414	0.00225563	0.107651	-1.09536
hsa_circRNA_008960	-0.872129	9.46577	-4.30403	0.00225596	0.107651	-1.0955
hsa_circRNA_103343	0.615757	7.60762	4.2979	0.00227555	0.107651	-1.10358
hsa_circRNA_101338	-0.789364	8.86563	-4.29719	0.00227785	0.107651	-1.10453
hsa_circRNA_406083	2.24829	11.9132	4.29361	0.0022894	0.107651	-1.10926
hsa_circRNA_101174	-0.758078	7.23778	-4.29338	0.00229013	0.107651	-1.10956
hsa_circRNA_402113	0.904847	5.86021	4.29062	0.00229907	0.107651	-1.1132
hsa_circRNA_001553	-0.677793	8.48003	-4.29057	0.00229922	0.107651	-1.11326
hsa_circRNA_104169	0.977842	8.52318	4.28943	0.00230294	0.107651	-1.11477
hsa_circRNA_101076	-1.39238	10.6141	-4.28687	0.00231129	0.107651	-1.11816
hsa_circRNA_403791	-0.916442	8.53453	-4.28258	0.00232534	0.107651	-1.12383
hsa_circRNA_004885	-1.31288	9.84725	-4.2825	0.00232561	0.107651	-1.12393
hsa_circRNA_407195	-1.38462	7.42088	-4.28147	0.00232897	0.107651	-1.12529
hsa_circRNA_405896	-0.838331	10.7365	-4.28054	0.00233204	0.107651	-1.12652
hsa_circRNA_005984	-0.560227	8.11197	-4.27609	0.00234675	0.107651	-1.1324
hsa_circRNA_031896	1.486	9.09214	4.27381	0.00235433	0.107651	-1.13542
hsa_circRNA_404651	-0.605909	6.81844	-4.27189	0.00236076	0.107651	-1.13797
hsa_circRNA_101592	-0.758253	8.46243	-4.26861	0.00237174	0.107651	-1.14231
hsa_circRNA_401327	0.754821	5.80942	4.26672	0.00237809	0.107651	-1.14482
hsa_circRNA_005940	1.09141	7.17625	4.26231	0.00239298	0.107651	-1.15065
hsa_circRNA_001671	-1.14667	9.06047	-4.26178	0.00239478	0.107651	-1.15136
hsa_circRNA_101303	1.20305	9.06165	4.2603	0.00239979	0.107651	-1.15332
hsa_circRNA_002084	-0.624214	8.73899	-4.26009	0.00240051	0.107651	-1.1536
hsa_circRNA_102625	-1.39561	7.75981	-4.258	0.00240764	0.107651	-1.15637
hsa_circRNA_404975	0.632219	8.08822	4.257	0.00241103	0.107651	-1.15769
hsa_circRNA_000466	-1.16598	8.84862	-4.24937	0.00243728	0.107651	-1.16783
hsa_circRNA_080719	-1.82997	8.41547	-4.2493	0.00243752	0.107651	-1.16792
hsa_circRNA_011040	-0.944493	9.21392	-4.24609	0.00244862	0.107651	-1.17217
hsa_circRNA_405713	0.547645	5.26665	4.24538	0.00245111	0.107651	-1.17312
hsa_circRNA_000345	-0.773479	7.2311	-4.23842	0.00247544	0.107651	-1.18237
hsa_circRNA_104060	0.543588	6.4949	4.2384	0.00247548	0.107651	-1.18239
hsa_circRNA_104775	-1.6763	9.56773	-4.23633	0.0024828	0.107651	-1.18515
hsa_circRNA_000764	-0.833915	15.2603	-4.23025	0.00250432	0.107651	-1.19323
hsa_circRNA_100130	0.776402	8.7062	4.23024	0.00250434	0.107651	-1.19324
hsa_circRNA_000967	-0.834955	8.19534	-4.22864	0.00251005	0.107651	-1.19537
hsa_circRNA_103666	-0.994847	7.89269	-4.22647	0.0025178	0.107651	-1.19826
hsa_circRNA_102708	-0.577626	6.80884	-4.22594	0.00251969	0.107651	-1.19897
hsa_circRNA_104504	-1.50807	8.70646	-4.22193	0.00253409	0.107651	-1.2043
hsa_circRNA_083999	0.648854	6.09322	4.22051	0.00253924	0.107651	-1.2062
hsa_circRNA_074410	-0.501411	7.70167	-4.2205	0.00253928	0.107651	-1.20622
hsa_circRNA_104532	1.92779	6.00021	4.22032	0.00253992	0.107651	-1.20646
hsa_circRNA_002006	-1.40379	8.3398	-4.21983	0.0025417	0.107651	-1.20711
hsa_circRNA_004142	0.579569	6.79042	4.21746	0.00255028	0.107651	-1.21027
hsa_circRNA_102578	-0.734858	10.7343	-4.21194	0.00257039	0.107651	-1.21763
hsa_circRNA_103599	0.678485	6.47993	4.21162	0.00257157	0.107651	-1.21806
hsa_circRNA_006886	1.10837	6.07612	4.21099	0.00257388	0.107651	-1.2189
hsa_circRNA_405492	0.745915	9.63913	4.20752	0.00258661	0.107651	-1.22352
hsa_circRNA_404446	-1.00712	7.49958	-4.20321	0.00260253	0.107651	-1.22927
hsa_circRNA_102035	0.573144	6.34306	4.19677	0.00262653	0.107651	-1.23787
hsa_circRNA_003052	-0.80896	6.72992	-4.19518	0.00263251	0.107651	-1.24
hsa_circRNA_104974	-1.39921	9.75548	-4.19511	0.00263275	0.107651	-1.24009
hsa_circRNA_102150	-1.06863	7.47409	-4.19459	0.00263472	0.107651	-1.24079
hsa_circRNA_051695	-1.26282	9.938	-4.19398	0.00263702	0.107651	-1.24161
hsa_circRNA_103572	1.64524	6.40146	4.19309	0.00264038	0.107651	-1.2428
hsa_circRNA_035484	-0.602019	6.70472	-4.19187	0.00264496	0.107651	-1.24443
hsa_circRNA_092495	-0.652248	8.25717	-4.19113	0.00264775	0.107651	-1.24542
hsa_circRNA_400296	-0.838643	6.89732	-4.18356	0.00267649	0.107846	-1.25554
hsa_circRNA_022019	-0.934933	8.5737	-4.18331	0.00267745	0.107846	-1.25587
hsa_circRNA_030421	0.584512	6.29665	4.18178	0.00268331	0.107846	-1.25792
hsa_circRNA_080787	0.684787	6.68641	4.18065	0.00268764	0.107846	-1.25943
hsa_circRNA_104973	-0.877544	10.8729	-4.17923	0.00269312	0.107846	-1.26134
hsa_circRNA_403042	-1.60122	8.29193	-4.17227	0.00272002	0.108597	-1.27066
hsa_circRNA_102375	0.470729	7.55402	4.16708	0.00274027	0.109058	-1.27762
hsa_circRNA_045404	-0.81063	7.19778	-4.16395	0.00275259	0.109058	-1.28183
hsa_circRNA_400093	-2.16617	10.3354	-4.16112	0.00276374	0.109058	-1.28562
hsa_circRNA_007148	2.49782	7.50083	4.16096	0.0027644	0.109058	-1.28584
hsa_circRNA_064292	-1.13749	7.96713	-4.15189	0.0028005	0.109498	-1.29801
hsa_circRNA_000180	-0.818874	7.14082	-4.15188	0.00280056	0.109498	-1.29803
hsa_circRNA_006700	0.559114	7.90571	4.14896	0.00281229	0.109498	-1.30195
hsa_circRNA_403189	0.680139	8.12051	4.14682	0.00282092	0.109498	-1.30483
hsa_circRNA_000084	-0.577108	6.13875	-4.14188	0.00284096	0.109498	-1.31147
hsa_circRNA_100073	-0.948819	10.4216	-4.1415	0.0028425	0.109498	-1.31198
hsa_circRNA_406327	0.690423	6.09417	4.14058	0.00284628	0.109498	-1.31323
hsa_circRNA_070982	-1.65271	9.45564	-4.13969	0.00284991	0.109498	-1.31442
hsa_circRNA_005303	1.50208	7.19574	4.13828	0.00285565	0.109498	-1.31631
hsa_circRNA_100069	-1.23497	12.2737	-4.13774	0.0028579	0.109498	-1.31705
hsa_circRNA_103545	0.852445	6.58937	4.13343	0.00287558	0.109571	-1.32284
hsa_circRNA_102874	-0.632202	7.43967	-4.13274	0.00287847	0.109571	-1.32378
hsa_circRNA_002268	-1.29532	9.89369	-4.13019	0.002889	0.109571	-1.32721
hsa_circRNA_066568	0.756435	5.65231	4.12799	0.00289817	0.109571	-1.33018
hsa_circRNA_024516	-1.26905	10.1786	-4.1271	0.00290186	0.109571	-1.33138
hsa_circRNA_101983	0.93469	5.60941	4.12533	0.00290925	0.109571	-1.33376
hsa_circRNA_026568	0.770632	9.57716	4.12317	0.00291826	0.1096	-1.33667
hsa_circRNA_104530	-0.56803	8.17677	-4.11895	0.002936	0.109884	-1.34236
hsa_circRNA_404628	-0.833455	7.84185	-4.11745	0.00294237	0.109884	-1.34439
hsa_circRNA_008091	0.518511	7.35014	4.11261	0.0029629	0.110341	-1.35092
hsa_circRNA_102480	-0.706528	6.75359	-4.109	0.00297831	0.11042	-1.35579
hsa_circRNA_004076	0.974902	5.92308	4.10184	0.00300917	0.11042	-1.36547
hsa_circRNA_026377	-0.801133	5.90994	-4.10063	0.00301442	0.11042	-1.3671
hsa_circRNA_104583	1.00778	8.21942	4.09924	0.00302045	0.11042	-1.36898
hsa_circRNA_101319	2.50181	6.71598	4.09876	0.00302254	0.11042	-1.36963
hsa_circRNA_028879	-1.04303	5.9668	-4.09551	0.0030367	0.11042	-1.37402
hsa_circRNA_092470	-1.30956	6.7471	-4.0948	0.00303984	0.11042	-1.37499
hsa_circRNA_406673	-1.60388	7.82008	-4.09244	0.00305018	0.11042	-1.37818
hsa_circRNA_104227	-0.572169	7.03435	-4.09091	0.0030569	0.11042	-1.38025
hsa_circRNA_103772	1.66648	7.54307	4.09042	0.00305905	0.11042	-1.38091
hsa_circRNA_101837	0.740656	6.26721	4.087	0.00307417	0.11042	-1.38554
hsa_circRNA_102481	0.953648	5.8074	4.08678	0.00307517	0.11042	-1.38585
hsa_circRNA_100534	-0.639131	9.32606	-4.08653	0.00307629	0.11042	-1.38619
hsa_circRNA_104636	-0.549087	6.04695	-4.08482	0.00308385	0.11042	-1.38849
hsa_circRNA_049382	-1.17367	8.37952	-4.0816	0.00309819	0.11042	-1.39285
hsa_circRNA_101926	-0.699317	5.79208	-4.08115	0.00310021	0.11042	-1.39346
hsa_circRNA_001717	-1.4446	10.7498	-4.07798	0.00311444	0.11042	-1.39777
hsa_circRNA_101288	-0.487926	5.65448	-4.07686	0.00311946	0.11042	-1.39928
hsa_circRNA_038901	-1.03465	10.93	-4.07574	0.00312453	0.11042	-1.40081
hsa_circRNA_039465	-1.44808	7.55417	-4.0742	0.00313148	0.11042	-1.40289
hsa_circRNA_063583	-0.921023	9.35601	-4.07244	0.00313942	0.11042	-1.40527
hsa_circRNA_401576	-1.88918	7.52112	-4.06922	0.00315405	0.110641	-1.40964
hsa_circRNA_065638	-0.791087	8.59534	-4.0664	0.00316694	0.110801	-1.41347
hsa_circRNA_002561	-1.49247	8.27034	-4.06256	0.00318455	0.111125	-1.41868
hsa_circRNA_102447	-1.10982	7.29341	-4.05603	0.00321475	0.111134	-1.42756
hsa_circRNA_008245	1.59817	6.61742	4.0552	0.0032186	0.111134	-1.42868
hsa_circRNA_406040	-0.873998	8.18726	-4.05372	0.0032255	0.111134	-1.43069
hsa_circRNA_403898	-0.818012	6.20493	-4.05297	0.00322901	0.111134	-1.43172
hsa_circRNA_009306	-0.64499	9.29114	-4.04797	0.00325247	0.111134	-1.43852
hsa_circRNA_103574	1.40759	6.28416	4.04764	0.00325402	0.111134	-1.43897
hsa_circRNA_008587	-1.51464	9.89752	-4.04598	0.00326186	0.111134	-1.44123
hsa_circRNA_401057	1.52002	11.3216	4.04562	0.00326352	0.111134	-1.44171
hsa_circRNA_104903	-1.29048	8.32843	-4.04329	0.00327457	0.111134	-1.44489
hsa_circRNA_100377	-0.528124	5.79221	-4.04222	0.00327964	0.111134	-1.44634
hsa_circRNA_103862	-1.5713	9.34907	-4.04062	0.00328726	0.111134	-1.44852
hsa_circRNA_009962	-0.993974	8.98058	-4.03981	0.00329112	0.111134	-1.44963
hsa_circRNA_404445	-1.60095	8.22446	-4.03932	0.00329347	0.111134	-1.4503
hsa_circRNA_057186	0.571589	7.03119	4.03396	0.00331911	0.111275	-1.45759
hsa_circRNA_406946	-0.580226	6.62061	-4.03223	0.00332747	0.111275	-1.45995
hsa_circRNA_401782	1.13297	7.81734	4.03158	0.00333058	0.111275	-1.46083
hsa_circRNA_042882	-0.846319	7.13919	-4.03001	0.0033382	0.111275	-1.46298
hsa_circRNA_101241	0.570073	5.65933	4.02737	0.003351	0.111275	-1.46658
hsa_circRNA_104311	-1.57499	8.20104	-4.02569	0.00335917	0.111275	-1.46887
hsa_circRNA_405635	-1.09659	9.20797	-4.02488	0.00336309	0.111275	-1.46997
hsa_circRNA_015164	-1.21133	6.12807	-4.02457	0.00336463	0.111275	-1.4704
hsa_circRNA_102640	0.462178	6.61055	4.02218	0.0033763	0.111332	-1.47366
hsa_circRNA_008721	0.869202	9.38919	4.02077	0.00338322	0.111332	-1.47558
hsa_circRNA_001588	3.00762	9.35924	4.01909	0.00339146	0.111332	-1.47787
hsa_circRNA_102032	0.896866	7.09589	4.0151	0.00341115	0.111389	-1.48331
hsa_circRNA_405133	1.03377	10.3943	4.01414	0.00341592	0.111389	-1.48463
hsa_circRNA_103112	1.46142	7.48865	4.01366	0.00341834	0.111389	-1.48529
hsa_circRNA_001145	-0.880438	7.95439	-4.01138	0.00342965	0.111485	-1.4884
hsa_circRNA_402061	0.968763	6.0185	4.00868	0.00344313	0.11165	-1.49209
hsa_circRNA_102067	-1.22404	9.33105	-4.00507	0.00346123	0.111964	-1.49702
hsa_circRNA_405985	-0.955266	11.1045	-4.0012	0.00348078	0.112189	-1.50232
hsa_circRNA_406443	-0.597135	6.55932	-4.00035	0.00348508	0.112189	-1.50349
hsa_circRNA_085952	-0.65622	6.56147	-3.99157	0.00352985	0.112227	-1.51549
hsa_circRNA_100862	-1.32615	7.27214	-3.99122	0.00353166	0.112227	-1.51598
hsa_circRNA_073270	0.773586	9.8404	3.98741	0.00355132	0.112227	-1.5212
hsa_circRNA_100406	-0.552415	6.56758	-3.98642	0.00355643	0.112227	-1.52255
hsa_circRNA_102249	0.798542	6.34163	3.98347	0.00357172	0.112227	-1.52659
hsa_circRNA_404184	-1.88132	11.0438	-3.98319	0.00357318	0.112227	-1.52698
hsa_circRNA_000458	0.961893	5.57164	3.98114	0.00358387	0.112227	-1.52979
hsa_circRNA_034414	0.493692	6.98605	3.97663	0.00360752	0.112227	-1.53598
hsa_circRNA_403650	-0.949651	7.77452	-3.97418	0.00362043	0.112227	-1.53934
hsa_circRNA_002843	-0.528262	6.37663	-3.97349	0.00362402	0.112227	-1.54027
hsa_circRNA_001594	0.579812	11.9541	3.97022	0.00364136	0.112227	-1.54477
hsa_circRNA_406821	1.54001	9.43562	3.9701	0.00364201	0.112227	-1.54493
hsa_circRNA_002722	-1.33098	10.0393	-3.96711	0.00365792	0.112227	-1.54904
hsa_circRNA_104678	0.486406	10.1075	3.96644	0.00366148	0.112227	-1.54995
hsa_circRNA_045850	-0.567768	6.54526	-3.96447	0.00367204	0.112227	-1.55267
hsa_circRNA_405280	-0.704751	5.74687	-3.96326	0.00367853	0.112227	-1.55433
hsa_circRNA_009245	0.742212	5.55424	3.962	0.0036853	0.112227	-1.55606
hsa_circRNA_079311	-0.538219	6.24987	-3.95994	0.00369641	0.112227	-1.55889
hsa_circRNA_007779	0.463028	7.35324	3.95929	0.00369991	0.112227	-1.55979
hsa_circRNA_100640	0.486592	9.65667	3.95895	0.00370174	0.112227	-1.56025
hsa_circRNA_404771	-0.836269	7.01645	-3.95764	0.0037088	0.112227	-1.56204
hsa_circRNA_003704	-0.88707	7.56732	-3.95627	0.00371624	0.112227	-1.56393
hsa_circRNA_407202	0.847906	10.7411	3.95612	0.00371707	0.112227	-1.56414
hsa_circRNA_101289	0.603342	6.66308	3.95519	0.00372212	0.112227	-1.56542
hsa_circRNA_400319	-0.780834	7.95201	-3.95494	0.00372345	0.112227	-1.56575
hsa_circRNA_102654	0.587377	6.23691	3.95384	0.00372946	0.112227	-1.56728
hsa_circRNA_404401	0.570168	5.63687	3.95294	0.00373437	0.112227	-1.56851
hsa_circRNA_101061	-1.5211	8.99572	-3.95216	0.0037386	0.112227	-1.56958
hsa_circRNA_100381	0.540601	6.1126	3.95077	0.0037462	0.112227	-1.57149
hsa_circRNA_009052	0.551895	12.8531	3.9495	0.00375319	0.112227	-1.57325
hsa_circRNA_019442	-1.11338	12.2914	-3.94783	0.00376236	0.112227	-1.57555
hsa_circRNA_404967	-0.734749	9.90081	-3.94745	0.00376444	0.112227	-1.57607
hsa_circRNA_104729	0.619623	6.90867	3.94664	0.00376887	0.112227	-1.57717
hsa_circRNA_404868	-0.683304	7.05298	-3.9442	0.00378234	0.112227	-1.58053
hsa_circRNA_013093	-0.607721	6.85374	-3.94413	0.00378276	0.112227	-1.58064
hsa_circRNA_103098	-1.04759	8.64106	-3.93999	0.00380574	0.112227	-1.58634
hsa_circRNA_104820	1.40468	6.70107	3.93824	0.00381544	0.112227	-1.58874
hsa_circRNA_400081	-0.488424	6.5952	-3.93505	0.0038333	0.112227	-1.59314
hsa_circRNA_400047	-0.469463	5.66852	-3.93399	0.00383926	0.112227	-1.5946
hsa_circRNA_100980	-0.469225	8.29763	-3.93366	0.00384111	0.112227	-1.59505
hsa_circRNA_401879	-0.598596	7.51495	-3.93362	0.00384134	0.112227	-1.59511
hsa_circRNA_000055	-0.942626	11.1689	-3.93353	0.00384186	0.112227	-1.59524
hsa_circRNA_402780	0.616965	6.5662	3.93183	0.0038514	0.112227	-1.59757
hsa_circRNA_404883	-0.552905	6.59607	-3.93045	0.0038592	0.112227	-1.59948
hsa_circRNA_031809	-0.99236	9.57738	-3.92923	0.00386612	0.112227	-1.60117
hsa_circRNA_100043	-1.33869	9.18154	-3.92751	0.00387587	0.112265	-1.60354
hsa_circRNA_104052	2.46544	6.59315	3.92429	0.0038942	0.112551	-1.60799
hsa_circRNA_103804	-1.4641	8.06648	-3.92035	0.00391673	0.112665	-1.61342
hsa_circRNA_000492	-1.38229	7.99262	-3.91859	0.00392681	0.112665	-1.61584
hsa_circRNA_405036	1.62958	13.7124	3.91738	0.00393383	0.112665	-1.61752
hsa_circRNA_100373	0.585162	9.24403	3.91642	0.00393931	0.112665	-1.61884
hsa_circRNA_085993	-1.29536	9.54974	-3.91331	0.00395736	0.112665	-1.62314
hsa_circRNA_406314	-0.46559	9.36136	-3.91279	0.00396035	0.112665	-1.62385
hsa_circRNA_404787	-1.52028	9.26886	-3.91187	0.00396569	0.112665	-1.62512
hsa_circRNA_003599	-1.54523	10.4474	-3.91183	0.00396594	0.112665	-1.62518
hsa_circRNA_103633	-0.843776	8.20752	-3.9094	0.0039801	0.112826	-1.62854
hsa_circRNA_406148	0.447512	6.61355	3.90628	0.00399835	0.113102	-1.63285
hsa_circRNA_011413	-1.04022	6.89638	-3.90082	0.0040305	0.11377	-1.6404
hsa_circRNA_405333	-1.05762	9.33375	-3.89782	0.00404833	0.113875	-1.64456
hsa_circRNA_011898	-0.672339	7.08713	-3.89586	0.00405996	0.113875	-1.64726
hsa_circRNA_083127	-1.32243	8.60525	-3.89325	0.00407555	0.113875	-1.65088
hsa_circRNA_092519	0.878075	8.14885	3.89119	0.00408795	0.113875	-1.65374
hsa_circRNA_101525	-0.970063	10.4432	-3.8909	0.00408965	0.113875	-1.65413
hsa_circRNA_102346	-0.421938	7.11546	-3.8905	0.00409208	0.113875	-1.65469
hsa_circRNA_100956	-1.8714	9.8331	-3.88858	0.00410363	0.113875	-1.65735
hsa_circRNA_004907	0.571464	6.95543	3.88638	0.00411696	0.113875	-1.6604
hsa_circRNA_104150	1.00738	10.094	3.88622	0.00411789	0.113875	-1.66062
hsa_circRNA_402904	-0.852354	10.5353	-3.88589	0.00411989	0.113875	-1.66107
hsa_circRNA_404578	0.734887	9.19765	3.88248	0.00414058	0.11421	-1.6658
hsa_circRNA_004721	-0.669284	11.0683	-3.88035	0.00415357	0.114295	-1.66875
hsa_circRNA_048728	-0.687785	8.92415	-3.8767	0.00417598	0.114295	-1.67382
hsa_circRNA_006946	-1.28173	10.8134	-3.87506	0.00418608	0.114295	-1.6761
hsa_circRNA_407325	-1.10134	8.2916	-3.8732	0.00419751	0.114295	-1.67867
hsa_circRNA_406240	2.26076	7.67991	3.87314	0.00419789	0.114295	-1.67875
hsa_circRNA_101867	-0.531886	7.69644	-3.87066	0.00421324	0.114295	-1.6822
hsa_circRNA_081386	-1.35233	9.76355	-3.86987	0.00421814	0.114295	-1.68329
hsa_circRNA_104828	-1.41707	10.5016	-3.86772	0.00423154	0.114295	-1.68628
hsa_circRNA_101321	-1.61795	8.67639	-3.86644	0.00423953	0.114295	-1.68806
hsa_circRNA_102718	-0.480198	6.19303	-3.86586	0.00424314	0.114295	-1.68886
hsa_circRNA_401099	-0.50883	5.78599	-3.86585	0.00424318	0.114295	-1.68887
hsa_circRNA_103255	-0.878806	8.87589	-3.86271	0.00426286	0.114295	-1.69324
hsa_circRNA_102039	1.10436	7.98727	3.86226	0.00426569	0.114295	-1.69386
hsa_circRNA_009031	0.963355	10.2508	3.86119	0.00427241	0.114295	-1.69535
hsa_circRNA_405584	-0.519282	6.57018	-3.86116	0.00427264	0.114295	-1.6954
hsa_circRNA_025597	-1.55279	7.27738	-3.85893	0.00428668	0.114441	-1.69849
hsa_circRNA_100504	0.649726	6.86766	3.85522	0.00431021	0.114838	-1.70365
hsa_circRNA_103525	-0.894744	6.85854	-3.85353	0.0043209	0.114893	-1.70599
hsa_circRNA_102615	-1.01857	9.3631	-3.85158	0.0043334	0.114995	-1.70871
hsa_circRNA_103553	0.885032	5.91845	3.84558	0.00437189	0.115523	-1.71705
hsa_circRNA_405429	-1.19803	9.48951	-3.84154	0.00439804	0.115523	-1.72268
hsa_circRNA_103588	0.496372	5.43987	3.8405	0.00440482	0.115523	-1.72413
hsa_circRNA_402126	-0.882153	9.54578	-3.84038	0.00440557	0.115523	-1.72429
hsa_circRNA_000808	0.581778	5.42678	3.83818	0.0044199	0.115523	-1.72735
hsa_circRNA_104078	-0.724851	6.48621	-3.83733	0.00442548	0.115523	-1.72854
hsa_circRNA_405989	0.767625	7.08318	3.83721	0.00442624	0.115523	-1.72871
hsa_circRNA_004607	0.556866	7.08329	3.83683	0.00442876	0.115523	-1.72924
hsa_circRNA_102608	-0.505425	6.24399	-3.83599	0.00443427	0.115523	-1.73041
hsa_circRNA_091537	-0.674272	8.52438	-3.83508	0.00444018	0.115523	-1.73167
hsa_circRNA_008115	0.929185	8.25152	3.83294	0.00445428	0.115525	-1.73466
hsa_circRNA_000986	-0.400346	6.2026	-3.83243	0.00445762	0.115525	-1.73537
hsa_circRNA_406306	0.554706	6.81011	3.82838	0.00448438	0.115785	-1.74102
hsa_circRNA_104851	0.511508	5.8847	3.82827	0.00448508	0.115785	-1.74116
hsa_circRNA_103206	0.777403	9.3438	3.82324	0.00451861	0.116424	-1.74819
hsa_circRNA_103920	-0.711289	10.1946	-3.81648	0.00456401	0.116696	-1.75762
hsa_circRNA_104101	0.487715	5.24956	3.81322	0.00458604	0.116696	-1.76217
hsa_circRNA_101902	-1.26942	8.39382	-3.81188	0.00459518	0.116696	-1.76404
hsa_circRNA_104597	1.45207	7.6833	3.81055	0.00460421	0.116696	-1.7659
hsa_circRNA_102107	0.495366	6.15223	3.80841	0.00461882	0.116696	-1.76889
hsa_circRNA_074657	-1.09391	11.8681	-3.80814	0.00462067	0.116696	-1.76926
hsa_circRNA_404528	-0.502702	6.29152	-3.80797	0.00462183	0.116696	-1.7695
hsa_circRNA_068655	2.47011	7.14965	3.80759	0.00462442	0.116696	-1.77003
hsa_circRNA_103557	-0.534543	8.22214	-3.80698	0.00462862	0.116696	-1.77088
hsa_circRNA_065673	-1.04773	7.2474	-3.80664	0.00463093	0.116696	-1.77136
hsa_circRNA_000624	-1.00561	11.453	-3.80645	0.00463223	0.116696	-1.77162
hsa_circRNA_009725	-1.87977	8.10317	-3.80613	0.00463449	0.116696	-1.77208
hsa_circRNA_077032	-1.39142	9.37007	-3.8007	0.00467191	0.117416	-1.77967
hsa_circRNA_406535	-0.530739	6.21195	-3.79814	0.00468967	0.11764	-1.78325
hsa_circRNA_104866	0.739238	8.9791	3.79384	0.00471962	0.118168	-1.78926
hsa_circRNA_055754	-0.838163	14.402	-3.79024	0.00474492	0.118579	-1.79431
hsa_circRNA_402964	1.26409	12.2033	3.7882	0.00475925	0.118622	-1.79715
hsa_circRNA_028671	-1.38566	8.96321	-3.78733	0.00476539	0.118622	-1.79837
hsa_circRNA_101738	-0.407588	6.71234	-3.78608	0.00477427	0.118622	-1.80013
hsa_circRNA_405306	-0.50097	5.88791	-3.78494	0.00478234	0.118622	-1.80172
hsa_circRNA_001802	0.836023	6.39612	3.78183	0.00480448	0.118687	-1.80608
hsa_circRNA_400082	-2.13099	13.2986	-3.78077	0.00481205	0.118687	-1.80757
hsa_circRNA_400083	-0.467835	6.80059	-3.77931	0.00482249	0.118687	-1.80961
hsa_circRNA_102878	0.561011	6.66351	3.77905	0.00482434	0.118687	-1.80997
hsa_circRNA_404035	-0.552778	5.77992	-3.77775	0.00483367	0.118687	-1.8118
hsa_circRNA_104774	-1.59797	9.57541	-3.77707	0.00483856	0.118687	-1.81275
hsa_circRNA_001240	-0.622524	9.23731	-3.77545	0.00485022	0.118755	-1.81502
hsa_circRNA_028001	-0.564504	5.01825	-3.77136	0.00487977	0.119203	-1.82076
hsa_circRNA_103883	-0.726842	5.93504	-3.76994	0.00489007	0.119203	-1.82275
hsa_circRNA_100483	-0.429963	6.32844	-3.7692	0.00489545	0.119203	-1.82379
hsa_circRNA_102958	-0.417306	5.35949	-3.76676	0.00491326	0.119418	-1.82721
hsa_circRNA_000506	-0.470947	6.59559	-3.76358	0.00493654	0.119671	-1.83168
hsa_circRNA_100138	-0.61014	6.48703	-3.76288	0.00494168	0.119671	-1.83266
hsa_circRNA_074306	-2.10496	13.0823	-3.76075	0.00495734	0.119832	-1.83565
hsa_circRNA_100968	-0.575731	9.29321	-3.75856	0.00497355	0.120006	-1.83873
hsa_circRNA_003956	0.561383	6.59161	3.75672	0.00498712	0.120062	-1.8413
hsa_circRNA_102863	0.958942	7.97891	3.75473	0.00500197	0.120062	-1.84411
hsa_circRNA_100271	0.61687	6.99278	3.75457	0.00500314	0.120062	-1.84433
hsa_circRNA_101045	1.73054	8.76517	3.75338	0.00501201	0.120062	-1.846
hsa_circRNA_102919	0.54809	6.7966	3.75151	0.00502597	0.120126	-1.84863
hsa_circRNA_100014	0.663626	6.67924	3.74943	0.00504156	0.120126	-1.85155
hsa_circRNA_005840	-0.813295	5.6677	-3.7494	0.00504176	0.120126	-1.85159
hsa_circRNA_026634	-1.58433	9.13867	-3.74819	0.00505085	0.120127	-1.85329
hsa_circRNA_102877	0.63836	5.92403	3.74475	0.0050768	0.120351	-1.85813
hsa_circRNA_007091	-0.981917	6.05062	-3.74388	0.00508338	0.120351	-1.85935
hsa_circRNA_104318	-1.04842	6.57442	-3.74295	0.00509041	0.120351	-1.86066
hsa_circRNA_001803	0.430924	5.97921	3.74215	0.00509649	0.120351	-1.86179
hsa_circRNA_103779	-0.429298	6.77534	-3.73596	0.0051437	0.120591	-1.8705
hsa_circRNA_404543	-0.459349	6.70399	-3.73491	0.00515177	0.120591	-1.87198
hsa_circRNA_103433	0.728051	6.45018	3.7346	0.0051542	0.120591	-1.87242
hsa_circRNA_072396	-0.459868	6.57786	-3.73262	0.00516938	0.120591	-1.8752
hsa_circRNA_101099	0.415102	5.80907	3.7322	0.00517269	0.120591	-1.8758
hsa_circRNA_104810	0.462026	6.58525	3.73184	0.00517546	0.120591	-1.87631
hsa_circRNA_405841	-0.849065	8.90006	-3.73161	0.00517717	0.120591	-1.87662
hsa_circRNA_000645	-0.648147	10.0108	-3.73135	0.00517921	0.120591	-1.87699
hsa_circRNA_004440	-1.2222	6.48327	-3.72714	0.0052118	0.120813	-1.88292
hsa_circRNA_056159	-0.832123	9.40885	-3.72679	0.00521453	0.120813	-1.88341
hsa_circRNA_401459	-1.09048	7.68583	-3.7266	0.00521601	0.120813	-1.88368
hsa_circRNA_401801	0.971731	6.85507	3.72203	0.0052517	0.121274	-1.89012
hsa_circRNA_405043	0.998665	7.97837	3.7205	0.0052637	0.121274	-1.89228
hsa_circRNA_101610	0.609464	6.17105	3.7201	0.00526686	0.121274	-1.89285
hsa_circRNA_403287	-0.883556	7.11228	-3.71862	0.00527853	0.121274	-1.89494
hsa_circRNA_400766	-0.934121	6.62283	-3.71824	0.00528152	0.121274	-1.89547
hsa_circRNA_003134	-0.83775	8.77722	-3.71496	0.00530743	0.121529	-1.90009
hsa_circRNA_103890	1.17971	10.1665	3.71429	0.0053128	0.121529	-1.90105
hsa_circRNA_104396	-0.88999	10.6308	-3.71338	0.00532003	0.121529	-1.90233
hsa_circRNA_101627	-0.554284	6.82194	-3.70933	0.00535231	0.121772	-1.90805
hsa_circRNA_404763	0.563823	7.25141	3.70625	0.00537701	0.121772	-1.9124
hsa_circRNA_103719	0.780765	6.78185	3.70611	0.00537807	0.121772	-1.91258
hsa_circRNA_405806	-0.6181	5.53738	-3.70544	0.0053835	0.121772	-1.91354
hsa_circRNA_102965	-0.982973	6.86185	-3.70524	0.00538506	0.121772	-1.91381
hsa_circRNA_405771	-0.45881	6.30255	-3.70517	0.00538564	0.121772	-1.91391
hsa_circRNA_104754	0.520143	6.00571	3.70357	0.00539852	0.121856	-1.91617
hsa_circRNA_100559	0.73942	7.8225	3.69783	0.00544507	0.122699	-1.92428
hsa_circRNA_406392	-0.502789	6.47502	-3.69126	0.00549889	0.123343	-1.93357
hsa_circRNA_400073	-1.22467	9.97226	-3.69029	0.00550687	0.123343	-1.93494
hsa_circRNA_102457	-0.767667	10.7021	-3.68851	0.00552153	0.123343	-1.93746
hsa_circRNA_104620	-1.25476	8.34563	-3.68844	0.00552212	0.123343	-1.93756
hsa_circRNA_400703	-0.457303	6.47974	-3.68786	0.00552695	0.123343	-1.93838
hsa_circRNA_404662	-0.798223	6.46816	-3.68757	0.00552932	0.123343	-1.93879
hsa_circRNA_406053	-0.565266	5.66623	-3.68363	0.00556203	0.123629	-1.94436
hsa_circRNA_103177	-0.572664	6.57923	-3.68275	0.00556939	0.123629	-1.94561
hsa_circRNA_105037	-1.77303	11.8965	-3.68267	0.00557005	0.123629	-1.94572
hsa_circRNA_104539	-0.939517	9.06792	-3.68033	0.00558958	0.123854	-1.94903
hsa_circRNA_104928	-0.700565	10.8917	-3.67727	0.00561526	0.123854	-1.95336
hsa_circRNA_005619	-1.063	7.88782	-3.67692	0.00561825	0.123854	-1.95387
hsa_circRNA_000968	-1.96099	14.2063	-3.67462	0.00563761	0.123854	-1.95712
hsa_circRNA_100153	1.55736	6.2992	3.6739	0.00564373	0.123854	-1.95814
hsa_circRNA_007344	-0.606591	6.15831	-3.67337	0.00564817	0.123854	-1.95889
hsa_circRNA_101633	-0.718385	8.32444	-3.67248	0.00565577	0.123854	-1.96016
hsa_circRNA_040730	0.903114	8.84546	3.6723	0.00565731	0.123854	-1.96041
hsa_circRNA_042691	-1.58495	8.57899	-3.67151	0.00566402	0.123854	-1.96153
hsa_circRNA_406657	0.625663	5.94573	3.67013	0.00567575	0.123906	-1.96349
hsa_circRNA_001067	0.640015	16.3941	3.66726	0.00570022	0.124237	-1.96755
hsa_circRNA_092454	-1.0413	10.6813	-3.66354	0.00573213	0.124728	-1.97283
hsa_circRNA_001047	-1.09244	9.61657	-3.66129	0.00575144	0.124799	-1.97601
hsa_circRNA_102854	0.478492	5.99632	3.66098	0.00575418	0.124799	-1.97646
hsa_circRNA_042268	2.29107	9.28776	3.65685	0.00578991	0.125054	-1.98231
hsa_circRNA_060118	1.40558	8.66969	3.65481	0.00580769	0.125054	-1.98521
hsa_circRNA_404601	-0.589551	7.25166	-3.65476	0.00580815	0.125054	-1.98528
hsa_circRNA_103059	-0.701117	9.23686	-3.65472	0.00580844	0.125054	-1.98533
hsa_circRNA_008450	-1.07804	8.44984	-3.65421	0.00581295	0.125054	-1.98606
hsa_circRNA_102371	0.539366	6.44468	3.65228	0.00582978	0.125126	-1.9888
hsa_circRNA_406646	-0.449236	7.6004	-3.6491	0.0058577	0.125126	-1.99331
hsa_circRNA_104290	-0.560256	6.47	-3.64899	0.00585865	0.125126	-1.99347
hsa_circRNA_103508	0.779086	6.83993	3.64828	0.00586487	0.125126	-1.99447
hsa_circRNA_000797	1.07496	11.6556	3.64754	0.00587146	0.125126	-1.99553
hsa_circRNA_029830	-1.01246	8.90305	-3.64685	0.0058775	0.125126	-1.9965
hsa_circRNA_019032	-0.519376	6.32492	-3.64577	0.00588709	0.125126	-1.99804
hsa_circRNA_105001	-1.19251	10.1464	-3.64495	0.00589432	0.125126	-1.9992
hsa_circRNA_100840	-1.15615	10.403	-3.64278	0.00591355	0.125126	-2.00228
hsa_circRNA_405393	-0.664511	10.6418	-3.64217	0.005919	0.125126	-2.00315
hsa_circRNA_057822	-0.893431	10.027	-3.64208	0.00591982	0.125126	-2.00328
hsa_circRNA_062422	-0.50522	6.58951	-3.64046	0.00593423	0.125229	-2.00558
hsa_circRNA_101563	0.550898	7.3327	3.63942	0.00594356	0.125229	-2.00707
hsa_circRNA_036127	-0.886928	7.20857	-3.63237	0.00600687	0.126164	-2.01708
hsa_circRNA_061482	1.74991	7.60824	3.63205	0.00600974	0.126164	-2.01754
hsa_circRNA_004163	-1.47384	8.51903	-3.63132	0.00601641	0.126164	-2.01858
hsa_circRNA_404853	1.00061	14.0875	3.62845	0.00604241	0.126441	-2.02266
hsa_circRNA_102216	0.960789	6.16328	3.62722	0.00605362	0.126441	-2.02441
hsa_circRNA_100185	0.727955	8.29996	3.62672	0.00605815	0.126441	-2.02512
hsa_circRNA_091114	-0.43503	6.1522	-3.62305	0.00609174	0.12657	-2.03035
hsa_circRNA_101999	0.683495	6.46866	3.62123	0.00610848	0.12657	-2.03294
hsa_circRNA_402893	-0.951621	12.1361	-3.61984	0.00612127	0.12657	-2.03492
hsa_circRNA_400460	0.406584	5.99735	3.61968	0.00612275	0.12657	-2.03515
hsa_circRNA_101947	0.517096	6.52605	3.61894	0.00612957	0.12657	-2.0362
hsa_circRNA_062709	-0.613465	7.83767	-3.61873	0.00613145	0.12657	-2.03649
hsa_circRNA_011267	-1.63939	11.1477	-3.61747	0.0061431	0.12657	-2.03829
hsa_circRNA_103808	-0.927062	9.10434	-3.61626	0.00615432	0.12657	-2.04001
hsa_circRNA_405813	1.01014	12.4474	3.61452	0.00617049	0.12657	-2.04249
hsa_circRNA_092506	-0.581381	7.88619	-3.61261	0.00618827	0.12657	-2.04521
hsa_circRNA_100336	0.442413	5.6037	3.61199	0.00619402	0.12657	-2.04609
hsa_circRNA_102594	0.51323	10.6134	3.61199	0.00619408	0.12657	-2.0461
hsa_circRNA_103368	0.483399	5.39062	3.61196	0.00619433	0.12657	-2.04614
hsa_circRNA_400540	0.84623	13.262	3.61068	0.00620631	0.12657	-2.04797
hsa_circRNA_402177	-1.21541	11.6921	-3.60931	0.00621918	0.12657	-2.04992
hsa_circRNA_102459	-0.533993	6.07515	-3.6088	0.00622395	0.12657	-2.05065
hsa_circRNA_008382	0.410236	5.63042	3.60812	0.00623032	0.12657	-2.05162
hsa_circRNA_025162	-0.611024	7.31246	-3.60677	0.00624299	0.12657	-2.05354
hsa_circRNA_102454	0.522603	6.44105	3.60523	0.00625751	0.12657	-2.05573
hsa_circRNA_101848	-0.607767	7.32953	-3.60472	0.0062623	0.12657	-2.05646
hsa_circRNA_104720	-0.856845	9.00956	-3.60438	0.00626554	0.12657	-2.05695
hsa_circRNA_028184	-1.34271	8.56929	-3.60351	0.00627374	0.12657	-2.05818
hsa_circRNA_102463	0.497934	6.62162	3.60234	0.00628481	0.126601	-2.05985
hsa_circRNA_400692	-1.34282	14.8144	-3.60049	0.0063024	0.12663	-2.06249
hsa_circRNA_401461	-0.927262	11.5038	-3.59898	0.00631682	0.12663	-2.06465
hsa_circRNA_102526	0.546648	7.8729	3.59852	0.00632112	0.12663	-2.0653
hsa_circRNA_406091	-0.868367	11.5647	-3.59727	0.00633312	0.12663	-2.06709
hsa_circRNA_102326	-0.908557	7.69684	-3.59533	0.00635166	0.12663	-2.06986
hsa_circRNA_406239	0.557442	8.51366	3.59522	0.0063527	0.12663	-2.07001
hsa_circRNA_101329	-0.658281	7.9855	-3.5952	0.00635292	0.12663	-2.07004
hsa_circRNA_092508	-0.456462	7.74019	-3.59231	0.00638066	0.126824	-2.07416
hsa_circRNA_007315	-1.38148	10.9189	-3.59198	0.00638382	0.126824	-2.07463
hsa_circRNA_101989	-0.420784	7.59483	-3.59055	0.00639769	0.126824	-2.07668
hsa_circRNA_081599	-1.10648	10.2815	-3.59009	0.00640213	0.126824	-2.07734
hsa_circRNA_102300	-0.636166	7.62791	-3.58886	0.006414	0.126824	-2.07909
hsa_circRNA_103056	-0.658556	8.57662	-3.58806	0.00642178	0.126824	-2.08024
hsa_circRNA_102180	-0.714355	6.77974	-3.58712	0.00643088	0.126824	-2.08158
hsa_circRNA_061372	-0.484447	7.87534	-3.58629	0.00643895	0.126824	-2.08276
hsa_circRNA_103489	-1.60399	9.67855	-3.58265	0.00647448	0.127335	-2.08797
hsa_circRNA_406408	-1.15628	10.3271	-3.57778	0.00652227	0.128085	-2.09492
hsa_circRNA_406145	-0.443083	10.0699	-3.57669	0.00653298	0.128106	-2.09647
hsa_circRNA_069655	-0.583296	6.83786	-3.57102	0.00658925	0.128642	-2.10459
hsa_circRNA_102695	-0.862628	6.8529	-3.57097	0.0065898	0.128642	-2.10467
hsa_circRNA_092572	-0.741277	7.80169	-3.57086	0.00659081	0.128642	-2.10481
hsa_circRNA_023691	-1.64278	9.74232	-3.56939	0.00660555	0.128642	-2.10692
hsa_circRNA_008705	-0.636231	7.01303	-3.56907	0.0066087	0.128642	-2.10737
hsa_circRNA_031235	1.60621	5.90371	3.56475	0.00665206	0.128685	-2.11356
hsa_circRNA_062032	-1.02807	11.4224	-3.56442	0.00665537	0.128685	-2.11403
hsa_circRNA_004254	-1.15469	8.47916	-3.56346	0.00666504	0.128685	-2.1154
hsa_circRNA_400305	-0.609997	7.1586	-3.56195	0.00668025	0.128685	-2.11756
hsa_circRNA_104595	0.574333	8.98174	3.56192	0.00668056	0.128685	-2.1176
hsa_circRNA_405467	-0.85193	9.53221	-3.56061	0.0066939	0.128685	-2.11949
hsa_circRNA_103643	0.566506	6.56326	3.55877	0.00671252	0.128685	-2.12212
hsa_circRNA_102558	0.448504	5.5921	3.55867	0.00671359	0.128685	-2.12227
hsa_circRNA_101593	-0.792809	8.21641	-3.55715	0.00672906	0.128685	-2.12444
hsa_circRNA_401299	-0.903687	8.20678	-3.55662	0.00673446	0.128685	-2.1252
hsa_circRNA_049237	-0.736287	15.6633	-3.55628	0.00673793	0.128685	-2.12569
hsa_circRNA_024615	-1.18421	7.09767	-3.55526	0.00674828	0.128685	-2.12714
hsa_circRNA_105044	-0.546746	9.36787	-3.55522	0.00674871	0.128685	-2.1272
hsa_circRNA_015270	-0.405279	7.42044	-3.55365	0.00676474	0.128685	-2.12945
hsa_circRNA_405721	-0.801799	6.45511	-3.55312	0.0067702	0.128685	-2.13021
hsa_circRNA_407005	-1.23109	14.108	-3.55298	0.00677166	0.128685	-2.13041
hsa_circRNA_103000	-0.785225	9.17059	-3.55261	0.00677545	0.128685	-2.13094
hsa_circRNA_043081	-0.597392	6.16994	-3.55004	0.00680184	0.128769	-2.13462
hsa_circRNA_104094	-0.840298	8.54287	-3.54903	0.0068123	0.128769	-2.13607
hsa_circRNA_002115	0.521183	5.89192	3.5478	0.00682497	0.128769	-2.13783
hsa_circRNA_076337	-0.68876	6.70492	-3.54696	0.00683366	0.128769	-2.13904
hsa_circRNA_103012	-0.95513	9.62695	-3.54468	0.00685729	0.128769	-2.1423
hsa_circRNA_104490	0.874117	5.56858	3.54456	0.00685859	0.128769	-2.14248
hsa_circRNA_002361	-0.971251	8.36822	-3.54445	0.00685973	0.128769	-2.14264
hsa_circRNA_104929	-1.57309	10.0939	-3.54343	0.00687032	0.128769	-2.1441
hsa_circRNA_405481	1.08415	7.98058	3.54317	0.00687308	0.128769	-2.14448
hsa_circRNA_018572	-0.89497	8.29956	-3.54282	0.0068767	0.128769	-2.14497
hsa_circRNA_008794	0.774743	10.4897	3.54159	0.00688953	0.128827	-2.14674
hsa_circRNA_100783	-0.718043	9.09314	-3.54067	0.00689919	0.128827	-2.14806
hsa_circRNA_007607	0.463131	5.14048	3.53654	0.0069425	0.128892	-2.15398
hsa_circRNA_017969	-1.5494	11.711	-3.53627	0.00694534	0.128892	-2.15437
hsa_circRNA_006794	-0.496683	6.75269	-3.53627	0.00694534	0.128892	-2.15437
hsa_circRNA_404637	-0.596638	5.48549	-3.53552	0.00695328	0.128892	-2.15545
hsa_circRNA_005129	-0.51297	7.09226	-3.53494	0.00695933	0.128892	-2.15627
hsa_circRNA_102855	0.567439	8.40865	3.53342	0.00697539	0.128892	-2.15846
hsa_circRNA_101469	-1.84838	11.1535	-3.53322	0.00697751	0.128892	-2.15874
hsa_circRNA_407339	-1.46563	10.11	-3.53296	0.00698025	0.128892	-2.15911
hsa_circRNA_008180	-0.406537	6.40726	-3.53135	0.0069974	0.12903	-2.16143
hsa_circRNA_009161	0.623843	6.45462	3.52879	0.00702456	0.129351	-2.1651
hsa_circRNA_102852	-0.380049	6.49726	-3.5268	0.00704586	0.129546	-2.16796
hsa_circRNA_400162	-0.370661	6.67937	-3.52557	0.00705896	0.129546	-2.16972
hsa_circRNA_104352	0.649508	6.03684	3.52477	0.00706762	0.129546	-2.17088
hsa_circRNA_054937	-0.802241	6.19281	-3.52416	0.00707409	0.129546	-2.17175
hsa_circRNA_102858	-0.69001	6.42263	-3.52287	0.00708801	0.129549	-2.17361
hsa_circRNA_000936	-0.980337	6.53578	-3.52233	0.00709378	0.129549	-2.17438
hsa_circRNA_406858	-1.24383	8.03842	-3.51976	0.00712154	0.129878	-2.17807
hsa_circRNA_007850	1.49078	9.86286	3.51703	0.00715119	0.13024	-2.182
hsa_circRNA_036188	-1.77821	11.6682	-3.51386	0.00718564	0.130414	-2.18655
hsa_circRNA_404521	0.502382	5.38269	3.51283	0.00719692	0.130414	-2.18803
hsa_circRNA_057619	-1.02565	7.11483	-3.51235	0.00720219	0.130414	-2.18873
hsa_circRNA_405615	-0.658489	6.32224	-3.51227	0.00720302	0.130414	-2.18883
hsa_circRNA_100098	0.843221	6.57644	3.51024	0.00722531	0.130414	-2.19176
hsa_circRNA_103767	-1.0684	6.89033	-3.50913	0.00723749	0.130414	-2.19335
hsa_circRNA_101067	-0.659539	7.24433	-3.50619	0.00726997	0.130414	-2.19759
hsa_circRNA_008673	-0.456744	5.77417	-3.50477	0.00728571	0.130414	-2.19963
hsa_circRNA_404893	-0.528093	6.29977	-3.50437	0.00729006	0.130414	-2.2002
hsa_circRNA_100314	0.501211	6.88627	3.50196	0.00731684	0.130414	-2.20367
hsa_circRNA_062762	-0.921171	5.9293	-3.50172	0.00731952	0.130414	-2.20401
hsa_circRNA_102994	-0.607307	6.2523	-3.49992	0.00733965	0.130414	-2.20661
hsa_circRNA_104249	0.39489	6.41916	3.49988	0.00734001	0.130414	-2.20666
hsa_circRNA_047135	-0.870597	7.25813	-3.49947	0.00734461	0.130414	-2.20725
hsa_circRNA_406503	2.31075	8.47737	3.49929	0.00734666	0.130414	-2.20752
hsa_circRNA_000928	-0.737013	12.8344	-3.49915	0.00734818	0.130414	-2.20771
hsa_circRNA_100387	0.806507	11.2018	3.49838	0.00735677	0.130414	-2.20882
hsa_circRNA_405858	-0.428011	6.41245	-3.49805	0.00736056	0.130414	-2.20931
hsa_circRNA_101082	1.09122	6.75937	3.49707	0.00737151	0.130414	-2.21071
hsa_circRNA_104943	-0.753218	9.52656	-3.49679	0.00737468	0.130414	-2.21112
hsa_circRNA_008636	0.563451	6.19449	3.49676	0.00737499	0.130414	-2.21116
hsa_circRNA_005582	-0.614618	6.9281	-3.49562	0.00738773	0.130414	-2.21279
hsa_circRNA_100067	0.430569	5.20539	3.49538	0.00739047	0.130414	-2.21314
hsa_circRNA_070857	-0.408398	8.12509	-3.49371	0.00740924	0.130414	-2.21554
hsa_circRNA_041041	-0.966801	12.0917	-3.49313	0.00741578	0.130414	-2.21638
hsa_circRNA_026715	-0.601421	6.11201	-3.49273	0.00742029	0.130414	-2.21695
hsa_circRNA_401433	-1.69404	10.8985	-3.49214	0.00742702	0.130414	-2.21781
hsa_circRNA_046481	0.482644	7.00509	3.49059	0.00744451	0.130414	-2.22004
hsa_circRNA_001381	-0.697902	6.49324	-3.49053	0.00744523	0.130414	-2.22013
hsa_circRNA_101063	0.516658	5.29503	3.48768	0.00747762	0.130809	-2.22423
hsa_circRNA_002901	0.37807	16.9136	3.48441	0.00751498	0.131134	-2.22895
hsa_circRNA_100015	1.79064	7.54583	3.48381	0.0075218	0.131134	-2.22981
hsa_circRNA_025500	-1.2512	12.8526	-3.48335	0.00752712	0.131134	-2.23048
hsa_circRNA_048764	1.00376	15.6005	3.48139	0.00754963	0.131134	-2.2333
hsa_circRNA_024144	0.633278	11.6008	3.48077	0.00755674	0.131134	-2.23419
hsa_circRNA_100445	-1.90772	12.9069	-3.47993	0.00756643	0.131134	-2.23541
hsa_circRNA_102824	-0.688807	8.77479	-3.47983	0.00756761	0.131134	-2.23555
hsa_circRNA_000483	-0.399426	5.64951	-3.47918	0.0075751	0.131134	-2.23649
hsa_circRNA_103665	-0.78195	8.01858	-3.47821	0.00758629	0.131157	-2.23789
hsa_circRNA_405176	-0.479078	6.84762	-3.47543	0.00761851	0.131274	-2.2419
hsa_circRNA_101113	-1.81668	13.9437	-3.47465	0.00762753	0.131274	-2.24302
hsa_circRNA_100438	-1.1526	14.2091	-3.47404	0.00763461	0.131274	-2.24389
hsa_circRNA_006111	-0.490308	7.68895	-3.47327	0.00764357	0.131274	-2.245
hsa_circRNA_404468	-0.668963	6.58131	-3.4732	0.00764439	0.131274	-2.24511
hsa_circRNA_001694	-0.503419	7.14737	-3.47252	0.00765231	0.131274	-2.24609
hsa_circRNA_001788	-1.89809	11.1357	-3.47111	0.00766882	0.131388	-2.24813
hsa_circRNA_100450	1.81043	8.70997	3.46904	0.00769302	0.131633	-2.25111
hsa_circRNA_088487	-0.544699	6.44463	-3.46812	0.00770382	0.131648	-2.25243
hsa_circRNA_101322	-0.973654	6.5561	-3.46522	0.00773798	0.131894	-2.25662
hsa_circRNA_101069	-0.452211	6.02225	-3.46522	0.00773803	0.131894	-2.25663
hsa_circRNA_103443	0.634803	7.42501	3.4609	0.00778915	0.132451	-2.26286
hsa_circRNA_062191	-0.823914	7.10743	-3.45967	0.00780383	0.132451	-2.26464
hsa_circRNA_068684	-0.513082	8.99806	-3.45869	0.0078155	0.132451	-2.26605
hsa_circRNA_100683	-0.771383	9.33218	-3.45782	0.00782584	0.132451	-2.2673
hsa_circRNA_092146	-0.654582	6.0641	-3.45672	0.0078391	0.132451	-2.26891
hsa_circRNA_406420	-0.685865	7.88877	-3.45591	0.00784879	0.132451	-2.27008
hsa_circRNA_074598	0.435917	5.44975	3.45551	0.00785349	0.132451	-2.27064
hsa_circRNA_104194	0.805303	7.5795	3.45529	0.00785617	0.132451	-2.27096
hsa_circRNA_004215	-0.453666	9.07039	-3.45494	0.0078604	0.132451	-2.27147
hsa_circRNA_405477	-0.783258	8.98387	-3.45209	0.00789463	0.13286	-2.27559
hsa_circRNA_000879	-1.26374	7.04674	-3.45068	0.0079117	0.132886	-2.27763
hsa_circRNA_102156	0.485085	5.29604	3.45031	0.00791619	0.132886	-2.27817
hsa_circRNA_100889	0.525115	6.96583	3.4482	0.00794174	0.133147	-2.28122
hsa_circRNA_104476	0.388422	5.94987	3.44569	0.00797217	0.133489	-2.28484
hsa_circRNA_002032	-0.978938	10.7286	-3.4419	0.00801848	0.133613	-2.29032
hsa_circRNA_019875	-1.29252	9.94009	-3.44159	0.00802226	0.133613	-2.29076
hsa_circRNA_101009	-0.881376	8.39824	-3.4405	0.00803567	0.133613	-2.29234
hsa_circRNA_103401	-1.12156	12.6577	-3.4378	0.00806888	0.133613	-2.29625
hsa_circRNA_104915	-0.579137	6.64571	-3.43751	0.00807246	0.133613	-2.29667
hsa_circRNA_007249	2.22648	8.36533	3.43713	0.0080772	0.133613	-2.29722
hsa_circRNA_102956	0.801654	5.92069	3.43661	0.0080836	0.133613	-2.29797
hsa_circRNA_406693	-0.691139	11.0841	-3.43638	0.00808648	0.133613	-2.29831
hsa_circRNA_101565	0.556321	11.1501	3.43611	0.00808986	0.133613	-2.29871
hsa_circRNA_103515	2.09942	8.55234	3.43539	0.00809867	0.133613	-2.29973
hsa_circRNA_073942	-0.946874	9.86644	-3.43279	0.00813102	0.133613	-2.30351
hsa_circRNA_102593	0.542684	10.5529	3.43253	0.00813428	0.133613	-2.30389
hsa_circRNA_100549	0.866932	8.12628	3.43103	0.00815295	0.133613	-2.30606
hsa_circRNA_401641	-0.494933	9.74035	-3.43071	0.00815695	0.133613	-2.30652
hsa_circRNA_075445	2.13742	8.19194	3.43032	0.00816176	0.133613	-2.30708
hsa_circRNA_024379	-0.736671	7.79129	-3.42968	0.0081698	0.133613	-2.30801
hsa_circRNA_407008	0.590851	8.96936	3.42941	0.00817319	0.133613	-2.3084
hsa_circRNA_024402	-0.537018	6.02314	-3.42842	0.00818555	0.133613	-2.30983
hsa_circRNA_070941	-0.8408	8.46796	-3.42832	0.00818679	0.133613	-2.30998
hsa_circRNA_400141	-0.604428	5.46963	-3.42585	0.00821776	0.133613	-2.31355
hsa_circRNA_000750	-0.568967	8.70428	-3.42428	0.00823751	0.133613	-2.31582
hsa_circRNA_000865	0.778672	6.93062	3.42378	0.00824387	0.133613	-2.31655
hsa_circRNA_030433	-0.407467	6.22037	-3.42303	0.0082533	0.133613	-2.31763
hsa_circRNA_102250	0.830735	6.01462	3.42299	0.00825387	0.133613	-2.3177
hsa_circRNA_001678	2.95786	8.57926	3.42262	0.00825844	0.133613	-2.31822
hsa_circRNA_102327	-0.700477	7.41946	-3.42243	0.00826094	0.133613	-2.31851
hsa_circRNA_102329	0.440497	5.43771	3.42222	0.00826357	0.133613	-2.31881
hsa_circRNA_100071	0.509736	9.33346	3.42134	0.00827469	0.133613	-2.32008
hsa_circRNA_101838	0.750706	8.26378	3.42091	0.00828019	0.133613	-2.32071
hsa_circRNA_059975	-0.418322	5.67151	-3.41947	0.00829842	0.133613	-2.32279
hsa_circRNA_104355	0.66433	8.66537	3.41923	0.00830143	0.133613	-2.32314
hsa_circRNA_104507	-0.730427	13.5595	-3.4184	0.00831206	0.133613	-2.32435
hsa_circRNA_103997	-0.981374	7.43916	-3.41776	0.00832014	0.133613	-2.32527
hsa_circRNA_103124	1.09269	8.59906	3.41767	0.00832128	0.133613	-2.3254
hsa_circRNA_404622	-0.570808	6.54485	-3.41241	0.0083886	0.134392	-2.33302
hsa_circRNA_103844	0.914146	6.94558	3.4123	0.00839003	0.134392	-2.33318
hsa_circRNA_406877	-1.17174	9.44934	-3.40979	0.00842237	0.134697	-2.33683
hsa_circRNA_104269	-0.751555	8.69048	-3.40805	0.0084448	0.134697	-2.33934
hsa_circRNA_103244	0.836977	5.72283	3.40761	0.00845055	0.134697	-2.33999
hsa_circRNA_404849	-0.57152	6.59776	-3.4076	0.00845066	0.134697	-2.34
hsa_circRNA_001466	-0.716808	7.16609	-3.4069	0.00845973	0.134697	-2.34101
hsa_circRNA_084275	-0.609886	7.59223	-3.40273	0.00851398	0.135399	-2.34706
hsa_circRNA_080289	-0.919238	11.7678	-3.40072	0.00854027	0.135464	-2.34998
hsa_circRNA_103080	-1.53833	8.86544	-3.39961	0.00855488	0.135464	-2.3516
hsa_circRNA_030670	-0.622095	5.77847	-3.39928	0.00855917	0.135464	-2.35207
hsa_circRNA_083946	0.490514	5.70736	3.39787	0.00857769	0.135464	-2.35412
hsa_circRNA_030643	-0.63907	7.27245	-3.39777	0.00857899	0.135464	-2.35426
hsa_circRNA_101096	0.458362	6.6667	3.39736	0.00858439	0.135464	-2.35486
hsa_circRNA_405816	-1.02198	7.47127	-3.39603	0.00860187	0.135464	-2.35678
hsa_circRNA_404910	-0.703573	10.6885	-3.39351	0.00863524	0.135464	-2.36045
hsa_circRNA_069574	-0.780813	8.43794	-3.39232	0.00865106	0.135464	-2.36218
hsa_circRNA_103160	-0.747635	10.2078	-3.39192	0.00865639	0.135464	-2.36276
hsa_circRNA_103712	0.768927	8.40111	3.39173	0.00865887	0.135464	-2.36303
hsa_circRNA_104611	-0.678991	7.53959	-3.39005	0.00868127	0.135464	-2.36548
hsa_circRNA_010048	-0.931886	7.49532	-3.38925	0.00869193	0.135464	-2.36664
hsa_circRNA_076143	0.372382	5.39837	3.38805	0.00870794	0.135464	-2.36838
hsa_circRNA_018168	1.26614	7.15135	3.3872	0.00871921	0.135464	-2.36961
hsa_circRNA_004087	0.823125	5.74097	3.38707	0.008721	0.135464	-2.3698
hsa_circRNA_100943	-0.415364	6.15364	-3.38611	0.0087339	0.135464	-2.3712
hsa_circRNA_100232	-0.430812	6.96078	-3.38611	0.00873392	0.135464	-2.3712
hsa_circRNA_000127	0.496317	7.5933	3.38541	0.00874322	0.135464	-2.37221
hsa_circRNA_405159	-0.628591	7.86096	-3.38514	0.00874692	0.135464	-2.37261
hsa_circRNA_102248	0.733526	5.91631	3.38482	0.00875116	0.135464	-2.37307
hsa_circRNA_100346	0.864096	6.15026	3.38305	0.00877498	0.135464	-2.37564
hsa_circRNA_000784	-0.524555	6.97174	-3.38173	0.00879283	0.135464	-2.37756
hsa_circRNA_071649	-1.01434	12.8628	-3.38138	0.00879747	0.135464	-2.37806
hsa_circRNA_008068	-1.63624	14.0186	-3.38058	0.00880832	0.135464	-2.37923
hsa_circRNA_401904	-1.02518	9.80838	-3.38024	0.00881296	0.135464	-2.37973
hsa_circRNA_087659	0.674384	6.64119	3.37963	0.00882115	0.135464	-2.38061
hsa_circRNA_406971	-1.10026	8.91751	-3.37953	0.00882254	0.135464	-2.38076
hsa_circRNA_103756	1.41128	7.18175	3.37918	0.00882725	0.135464	-2.38126
hsa_circRNA_063603	0.567825	8.60143	3.37878	0.00883276	0.135464	-2.38185
hsa_circRNA_090328	0.633413	6.27581	3.37789	0.0088448	0.135464	-2.38314
hsa_circRNA_104888	-0.573764	6.93827	-3.37763	0.00884828	0.135464	-2.38351
hsa_circRNA_102139	-0.844156	8.68077	-3.37719	0.00885431	0.135464	-2.38416
hsa_circRNA_102796	0.419917	8.3857	3.37587	0.00887224	0.135511	-2.38607
hsa_circRNA_103759	-1.54207	11.2201	-3.37547	0.00887777	0.135511	-2.38666
hsa_circRNA_049434	-0.465616	5.7732	-3.37312	0.0089098	0.135722	-2.39007
hsa_circRNA_017521	-1.09367	10.1591	-3.37212	0.00892359	0.135722	-2.39153
hsa_circRNA_405835	0.535009	6.19192	3.37161	0.00893052	0.135722	-2.39227
hsa_circRNA_404750	-0.39112	5.95785	-3.37134	0.00893421	0.135722	-2.39266
hsa_circRNA_070521	-0.849434	7.16767	-3.37017	0.00895038	0.135722	-2.39437
hsa_circRNA_104523	0.917459	7.45593	3.36999	0.00895285	0.135722	-2.39463
hsa_circRNA_061880	-0.791322	8.63288	-3.36733	0.00898955	0.136007	-2.3985
hsa_circRNA_405249	-0.908114	7.32104	-3.36631	0.00900365	0.136007	-2.39999
hsa_circRNA_405140	-0.688536	8.94939	-3.36415	0.00903358	0.136007	-2.40313
hsa_circRNA_039920	-0.372663	6.72442	-3.36291	0.00905082	0.136007	-2.40493
hsa_circRNA_401122	-0.374456	6.91119	-3.36247	0.00905696	0.136007	-2.40557
hsa_circRNA_401218	-1.2267	8.23799	-3.36187	0.00906525	0.136007	-2.40644
hsa_circRNA_103039	1.43888	8.57711	3.36183	0.0090659	0.136007	-2.40651
hsa_circRNA_001090	-0.477056	6.96754	-3.36181	0.00906608	0.136007	-2.40653
hsa_circRNA_103105	-0.367946	5.93324	-3.3618	0.00906621	0.136007	-2.40654
hsa_circRNA_025402	2.03677	7.29667	3.36125	0.00907397	0.136007	-2.40735
hsa_circRNA_105014	0.460871	6.18359	3.35923	0.00910219	0.136082	-2.41029
hsa_circRNA_070294	-1.04735	9.84543	-3.35919	0.00910276	0.136082	-2.41035
hsa_circRNA_059476	-0.87108	9.44585	-3.35802	0.00911913	0.136082	-2.41205
hsa_circRNA_103649	0.434532	6.60101	3.35787	0.00912126	0.136082	-2.41227
hsa_circRNA_102208	-0.587417	6.65924	-3.35724	0.00913011	0.136082	-2.41319
hsa_circRNA_006766	0.406773	16.1379	3.35556	0.00915365	0.13628	-2.41562
hsa_circRNA_404385	0.465332	7.31047	3.35183	0.0092064	0.13636	-2.42106
hsa_circRNA_103999	-0.766296	9.40429	-3.35018	0.0092298	0.13636	-2.42347
hsa_circRNA_031282	-0.908166	7.31047	-3.34925	0.00924305	0.13636	-2.42482
hsa_circRNA_400413	-0.401658	6.04412	-3.3489	0.00924795	0.13636	-2.42533
hsa_circRNA_400863	-0.452113	6.47768	-3.3486	0.00925231	0.13636	-2.42577
hsa_circRNA_000960	-0.957302	9.03155	-3.34828	0.00925681	0.13636	-2.42623
hsa_circRNA_092417	-0.608629	10.4611	-3.34785	0.00926297	0.13636	-2.42686
hsa_circRNA_406724	0.765035	6.78351	3.34763	0.00926615	0.13636	-2.42719
hsa_circRNA_007080	-1.05389	8.51792	-3.34745	0.00926868	0.13636	-2.42744
hsa_circRNA_103376	0.541481	6.15762	3.34587	0.00929129	0.13636	-2.42975
hsa_circRNA_404254	-0.434076	6.00177	-3.34537	0.00929846	0.13636	-2.43048
hsa_circRNA_079990	0.536335	10.2559	3.34444	0.00931173	0.13636	-2.43183
hsa_circRNA_403409	0.863743	6.03332	3.34414	0.00931609	0.13636	-2.43227
hsa_circRNA_077747	0.642478	7.07427	3.34406	0.00931724	0.13636	-2.43239
hsa_circRNA_400044	-0.541628	7.94772	-3.344	0.00931807	0.13636	-2.43247
hsa_circRNA_405998	-0.426744	6.47866	-3.34353	0.00932473	0.13636	-2.43315
hsa_circRNA_103109	0.460808	5.16806	3.34246	0.00934015	0.13636	-2.43471
hsa_circRNA_004528	-0.960195	9.32375	-3.34154	0.00935333	0.13636	-2.43605
hsa_circRNA_400835	0.413756	6.5352	3.33932	0.00938542	0.13636	-2.43929
hsa_circRNA_403970	-0.451682	8.44186	-3.33922	0.00938681	0.13636	-2.43943
hsa_circRNA_001959	0.87584	9.43175	3.33879	0.00939314	0.13636	-2.44007
hsa_circRNA_004975	-0.457932	6.19047	-3.33866	0.009395	0.13636	-2.44026
hsa_circRNA_406522	-0.381659	6.44428	-3.33817	0.00940206	0.13636	-2.44097
hsa_circRNA_102111	0.529284	7.70591	3.33632	0.00942885	0.13636	-2.44366
hsa_circRNA_103789	-1.33464	8.65927	-3.33613	0.00943169	0.13636	-2.44394
hsa_circRNA_103792	-0.522575	7.80571	-3.33469	0.00945259	0.13636	-2.44604
hsa_circRNA_007448	0.461899	6.72229	3.334	0.0094627	0.13636	-2.44705
hsa_circRNA_100188	-1.05344	8.12856	-3.33361	0.00946842	0.13636	-2.44762
hsa_circRNA_407242	-0.611794	7.88289	-3.33327	0.00947332	0.13636	-2.44811
hsa_circRNA_101851	0.46359	7.88416	3.3328	0.00948027	0.13636	-2.44881
hsa_circRNA_056734	-1.0173	9.84351	-3.33244	0.00948541	0.13636	-2.44932
hsa_circRNA_101365	-0.581556	8.82851	-3.33183	0.00949436	0.13636	-2.45021
hsa_circRNA_102853	-0.528585	6.12226	-3.33161	0.00949753	0.13636	-2.45053
hsa_circRNA_104425	0.78088	6.70475	3.32964	0.00952644	0.136621	-2.4534
hsa_circRNA_104690	1.88552	7.31252	3.32898	0.00953621	0.136621	-2.45437
hsa_circRNA_101641	-0.426511	6.35638	-3.32595	0.0095808	0.136666	-2.45879
hsa_circRNA_104091	-1.18355	8.5739	-3.32541	0.00958889	0.136666	-2.45959
hsa_circRNA_000170	0.438719	6.39525	3.32515	0.00959261	0.136666	-2.45996
hsa_circRNA_001873	-0.697005	8.77605	-3.32422	0.00960641	0.136666	-2.46132
hsa_circRNA_104701	0.503452	5.79046	3.32396	0.00961031	0.136666	-2.4617
hsa_circRNA_100686	0.460329	6.33571	3.32393	0.00961078	0.136666	-2.46175
hsa_circRNA_401763	0.68578	6.46579	3.32389	0.00961134	0.136666	-2.4618
hsa_circRNA_074834	-0.818869	10.5256	-3.32003	0.00966874	0.13727	-2.46744
hsa_circRNA_100609	-0.832898	7.51096	-3.31896	0.00968465	0.13727	-2.46899
hsa_circRNA_101803	-0.722715	7.30864	-3.3185	0.00969161	0.13727	-2.46967
hsa_circRNA_102616	2.02057	9.45162	3.31766	0.00970416	0.13727	-2.4709
hsa_circRNA_100076	0.462454	5.31324	3.31757	0.00970542	0.13727	-2.47102
hsa_circRNA_404957	-0.730026	7.74408	-3.31568	0.00973381	0.137456	-2.47378
hsa_circRNA_051147	-1.03692	6.77911	-3.31527	0.00973994	0.137456	-2.47438
hsa_circRNA_405010	-0.614715	8.0552	-3.31427	0.00975506	0.137456	-2.47585
hsa_circRNA_001955	0.463117	7.27047	3.31394	0.00975997	0.137456	-2.47632
hsa_circRNA_103310	0.500998	7.48295	3.31245	0.00978252	0.137534	-2.47851
hsa_circRNA_049851	-0.871167	11.7775	-3.31221	0.00978617	0.137534	-2.47886
hsa_circRNA_401533	-0.815781	7.76434	-3.31128	0.00980021	0.137586	-2.48022
hsa_circRNA_079422	-0.805362	15.4655	-3.30904	0.00983413	0.137916	-2.48349
hsa_circRNA_100478	0.344865	7.83311	3.30729	0.00986066	0.137962	-2.48604
hsa_circRNA_407105	-0.468676	5.71946	-3.30657	0.0098717	0.137962	-2.4871
hsa_circRNA_004611	-0.985138	10.5902	-3.30619	0.00987749	0.137962	-2.48765
hsa_circRNA_400828	0.507923	5.53182	3.3061	0.00987887	0.137962	-2.48778
hsa_circRNA_103813	-0.769262	8.35516	-3.30454	0.00990272	0.13815	-2.49007
hsa_circRNA_005297	1.99104	7.89432	3.3036	0.00991705	0.138205	-2.49143
hsa_circRNA_007105	-1.69101	8.99031	-3.29808	0.0100019	0.139242	-2.4995
hsa_circRNA_025249	-2.00449	13.0999	-3.29574	0.0100382	0.1396	-2.50293
hsa_circRNA_037680	1.06339	7.14109	3.29433	0.0100601	0.13971	-2.50499
hsa_circRNA_004262	-0.877331	9.26461	-3.29388	0.0100671	0.13971	-2.50565
hsa_circRNA_405272	-0.437066	8.02137	-3.29223	0.0100928	0.139817	-2.50806
hsa_circRNA_104206	0.412209	5.73366	3.29204	0.0100958	0.139817	-2.50834
hsa_circRNA_010015	-0.882994	12.7528	-3.28896	0.0101441	0.14014	-2.51285
hsa_circRNA_104686	-1.05182	7.06967	-3.28843	0.0101522	0.14014	-2.51361
hsa_circRNA_001680	-0.719539	9.67327	-3.288	0.0101591	0.14014	-2.51425
hsa_circRNA_101008	-0.386453	6.38716	-3.28785	0.0101613	0.14014	-2.51446
hsa_circRNA_103145	0.612125	8.35552	3.28438	0.0102161	0.140455	-2.51955
hsa_circRNA_004830	-0.438158	7.26815	-3.28412	0.0102202	0.140455	-2.51992
hsa_circRNA_405123	-0.377846	5.89432	-3.28388	0.010224	0.140455	-2.52028
hsa_circRNA_104979	0.737166	6.6237	3.28373	0.0102264	0.140455	-2.5205
hsa_circRNA_086376	0.781162	7.75001	3.28152	0.0102614	0.140789	-2.52373
hsa_circRNA_035301	-1.12581	9.95975	-3.27969	0.0102904	0.141021	-2.52641
hsa_circRNA_102113	-0.60652	7.89062	-3.27845	0.0103102	0.141021	-2.52823
hsa_circRNA_089659	0.757715	6.50166	3.27789	0.0103192	0.141021	-2.52905
hsa_circRNA_020275	-0.799612	6.84169	-3.2778	0.0103206	0.141021	-2.52918
hsa_circRNA_091558	-0.630578	7.3296	-3.27649	0.0103416	0.141153	-2.5311
hsa_circRNA_103093	-0.377677	7.34957	-3.27586	0.0103516	0.141153	-2.53201
hsa_circRNA_407048	0.816896	6.44063	3.27392	0.0103827	0.14135	-2.53486
hsa_circRNA_406135	-0.41596	7.00107	-3.27261	0.0104038	0.14135	-2.53677
hsa_circRNA_102638	0.768283	7.6302	3.27171	0.0104183	0.14135	-2.53809
hsa_circRNA_011491	-0.977584	13.4353	-3.27147	0.0104223	0.14135	-2.53845
hsa_circRNA_400024	-0.712248	7.18291	-3.2712	0.0104266	0.14135	-2.53885
hsa_circRNA_405752	-0.588248	7.65992	-3.271	0.0104298	0.14135	-2.53914
hsa_circRNA_104676	-0.386085	6.06211	-3.26938	0.010456	0.141512	-2.54151
hsa_circRNA_075013	-0.465722	6.28414	-3.26825	0.0104743	0.141512	-2.54316
hsa_circRNA_103985	-0.509458	6.86704	-3.26787	0.0104805	0.141512	-2.54373
hsa_circRNA_007682	-0.855061	7.94946	-3.26763	0.0104843	0.141512	-2.54407
hsa_circRNA_074089	-0.436235	5.20834	-3.2666	0.0105011	0.141517	-2.54559
hsa_circRNA_403760	-0.446682	5.63222	-3.26531	0.0105221	0.141517	-2.54748
hsa_circRNA_037835	0.417342	5.38855	3.26501	0.010527	0.141517	-2.54792
hsa_circRNA_100018	2.23525	11.597	3.26499	0.0105273	0.141517	-2.54795
hsa_circRNA_005843	0.686601	5.86089	3.2612	0.0105893	0.142206	-2.5535
hsa_circRNA_103406	-0.515782	5.98128	-3.26054	0.0106001	0.142208	-2.55447
hsa_circRNA_407002	-0.441691	6.90695	-3.25848	0.010634	0.142519	-2.55749
hsa_circRNA_001712	-0.432764	7.27498	-3.25719	0.0106553	0.142591	-2.55938
hsa_circRNA_102738	0.433031	5.8831	3.25607	0.0106738	0.142591	-2.56102
hsa_circRNA_104867	1.04368	9.98054	3.25605	0.0106742	0.142591	-2.56106
hsa_circRNA_104357	-0.665531	9.08283	-3.25556	0.0106823	0.142591	-2.56177
hsa_circRNA_005684	0.485299	6.0912	3.25446	0.0107004	0.142598	-2.56338
hsa_circRNA_401678	1.27827	9.06128	3.25327	0.0107203	0.142598	-2.56513
hsa_circRNA_102272	2.06233	8.76392	3.25307	0.0107235	0.142598	-2.56542
hsa_circRNA_051907	-0.397061	16.1232	-3.25294	0.0107257	0.142598	-2.56561
hsa_circRNA_092447	0.4366	5.34379	3.25052	0.010766	0.142973	-2.56916
hsa_circRNA_100419	0.507536	5.65913	3.24912	0.0107894	0.142973	-2.57122
hsa_circRNA_000970	-0.507502	7.08744	-3.24877	0.0107953	0.142973	-2.57173
hsa_circRNA_104403	0.530977	6.59016	3.24867	0.0107969	0.142973	-2.57187
hsa_circRNA_102008	0.691392	9.2506	3.248	0.0108081	0.142979	-2.57285
hsa_circRNA_023525	-1.2393	14.2938	-3.24655	0.0108325	0.14301	-2.57499
hsa_circRNA_406839	0.925599	9.70658	3.2462	0.0108384	0.14301	-2.5755
hsa_circRNA_027446	-2.10986	11.2104	-3.24594	0.0108428	0.14301	-2.57588
hsa_circRNA_101318	0.525368	8.49765	3.2424	0.0109025	0.143591	-2.58108
hsa_circRNA_100084	0.977381	9.9549	3.24205	0.0109084	0.143591	-2.58159
hsa_circRNA_101948	-0.642968	13.6591	-3.24118	0.0109231	0.143642	-2.58286
hsa_circRNA_102116	1.50692	8.17713	3.24014	0.0109408	0.143733	-2.5844
hsa_circRNA_090446	1.4029	11.5131	3.23885	0.0109627	0.143796	-2.58629
hsa_circRNA_103138	-0.714119	6.91754	-3.23858	0.0109672	0.143796	-2.58668
hsa_circRNA_006893	0.960964	6.06147	3.23738	0.0109877	0.143923	-2.58845
hsa_circRNA_088780	-0.87194	9.19894	-3.23644	0.0110037	0.143951	-2.58983
hsa_circRNA_101034	-0.758152	11.4476	-3.23548	0.0110202	0.143951	-2.59124
hsa_circRNA_092365	-0.572379	5.73864	-3.23535	0.0110223	0.143951	-2.59142
hsa_circRNA_103826	-0.950487	6.93408	-3.23417	0.0110425	0.143955	-2.59316
hsa_circRNA_103860	0.895383	6.31212	3.23318	0.0110595	0.143955	-2.59461
hsa_circRNA_103171	0.490865	9.06674	3.23301	0.0110625	0.143955	-2.59487
hsa_circRNA_004581	-1.61309	9.84566	-3.23281	0.0110659	0.143955	-2.59516
hsa_circRNA_405678	-0.78332	7.12596	-3.23143	0.0110897	0.143994	-2.59718
hsa_circRNA_405543	-0.5729	7.94244	-3.23137	0.0110907	0.143994	-2.59727
hsa_circRNA_052507	-0.988574	8.21662	-3.23002	0.011114	0.144156	-2.59926
hsa_circRNA_102264	0.942684	7.61195	3.2286	0.0111385	0.144334	-2.60134
hsa_circRNA_013663	0.655929	6.45616	3.22645	0.0111756	0.144674	-2.60449
hsa_circRNA_104567	-0.664108	7.20502	-3.22534	0.011195	0.144783	-2.60613
hsa_circRNA_001267	-0.480681	7.19489	-3.22446	0.0112104	0.144841	-2.60743
hsa_circRNA_100966	0.412403	6.60257	3.22353	0.0112265	0.144909	-2.60879
hsa_circRNA_104125	-0.394256	5.86454	-3.22246	0.0112451	0.144984	-2.61035
hsa_circRNA_086760	-0.378327	6.89859	-3.22091	0.0112723	0.144984	-2.61264
hsa_circRNA_101822	-0.415423	7.56092	-3.22072	0.0112757	0.144984	-2.61292
hsa_circRNA_017516	0.998749	9.8993	3.22044	0.0112806	0.144984	-2.61333
hsa_circRNA_005054	-0.707979	7.10793	-3.22008	0.0112869	0.144984	-2.61386
hsa_circRNA_012733	-0.388911	6.19	-3.2194	0.0112987	0.144997	-2.61485
hsa_circRNA_087581	-0.670149	7.46398	-3.21653	0.0113494	0.1454	-2.61908
hsa_circRNA_407024	-1.82105	12.2722	-3.21637	0.011352	0.1454	-2.6193
hsa_circRNA_405241	-0.423532	9.47018	-3.21482	0.0113795	0.145611	-2.62159
hsa_circRNA_406376	0.371694	7.88514	3.21366	0.0114	0.145729	-2.6233
hsa_circRNA_404558	-0.776371	10.3831	-3.21306	0.0114106	0.145729	-2.62418
hsa_circRNA_100782	-0.655681	9.58207	-3.21234	0.0114233	0.145752	-2.62523
hsa_circRNA_030175	0.394555	5.68523	3.21015	0.0114624	0.146016	-2.62846
hsa_circRNA_101814	0.589879	6.67195	3.20995	0.011466	0.146016	-2.62876
hsa_circRNA_001668	-0.438792	6.27094	-3.20847	0.0114923	0.146211	-2.63093
hsa_circRNA_007008	0.863912	10.0363	3.20682	0.0115219	0.146335	-2.63335
hsa_circRNA_003265	0.466281	7.4668	3.2067	0.0115241	0.146335	-2.63354
hsa_circRNA_104488	-0.781461	7.70695	-3.20405	0.0115716	0.146448	-2.63743
hsa_circRNA_001695	0.355052	6.15717	3.20364	0.0115791	0.146448	-2.63804
hsa_circRNA_403236	0.560592	8.3969	3.20335	0.0115842	0.146448	-2.63846
hsa_circRNA_405384	-0.911476	8.1374	-3.20173	0.0116135	0.146448	-2.64085
hsa_circRNA_101675	1.03955	6.58507	3.20166	0.0116147	0.146448	-2.64094
hsa_circRNA_001978	-0.608345	8.30722	-3.20096	0.0116274	0.146448	-2.64198
hsa_circRNA_406142	-0.917224	9.08924	-3.20088	0.0116289	0.146448	-2.6421
hsa_circRNA_103711	0.364063	5.46171	3.20077	0.0116308	0.146448	-2.64226
hsa_circRNA_404570	0.655964	7.60747	3.19985	0.0116475	0.146448	-2.64361
hsa_circRNA_103023	-0.761631	10.9381	-3.19976	0.011649	0.146448	-2.64374
hsa_circRNA_405016	0.927277	11.3339	3.19792	0.0116824	0.146448	-2.64645
hsa_circRNA_100665	0.565741	7.99246	3.19751	0.0116899	0.146448	-2.64705
hsa_circRNA_104482	-0.790111	7.98243	-3.19656	0.0117073	0.146448	-2.64845
hsa_circRNA_101200	0.439808	5.73125	3.19653	0.0117078	0.146448	-2.6485
hsa_circRNA_102422	-1.02955	9.5132	-3.19621	0.0117137	0.146448	-2.64897
hsa_circRNA_101805	0.596013	6.12047	3.19584	0.0117204	0.146448	-2.64951
hsa_circRNA_000982	0.733331	5.16213	3.19535	0.0117292	0.146448	-2.65023
hsa_circRNA_064319	0.690153	7.33885	3.19524	0.0117313	0.146448	-2.65039
hsa_circRNA_102127	0.535687	8.79625	3.19348	0.0117634	0.146693	-2.65298
hsa_circRNA_400670	0.347948	7.78048	3.19171	0.0117959	0.146693	-2.65559
hsa_circRNA_405935	-0.326907	5.54597	-3.19066	0.0118153	0.146693	-2.65714
hsa_circRNA_405008	-0.448009	6.19703	-3.19013	0.011825	0.146693	-2.65792
hsa_circRNA_040822	0.719565	6.40096	3.18999	0.0118276	0.146693	-2.65813
hsa_circRNA_101090	0.420198	9.07707	3.18955	0.0118357	0.146693	-2.65877
hsa_circRNA_003223	0.587397	6.05865	3.18833	0.0118581	0.146693	-2.66056
hsa_circRNA_064155	0.453913	5.60193	3.18805	0.0118633	0.146693	-2.66098
hsa_circRNA_008990	-0.59799	6.18545	-3.18779	0.0118682	0.146693	-2.66137
hsa_circRNA_407000	-0.443277	7.66577	-3.18763	0.0118711	0.146693	-2.6616
hsa_circRNA_076875	-0.592849	10.0817	-3.18757	0.0118722	0.146693	-2.66169
hsa_circRNA_102140	-1.37733	8.54479	-3.18579	0.0119051	0.146832	-2.66431
hsa_circRNA_066845	-0.387247	7.15782	-3.18557	0.0119092	0.146832	-2.66463
hsa_circRNA_036450	-0.37488	5.59487	-3.18464	0.0119266	0.146832	-2.66601
hsa_circRNA_000792	-0.630892	10.0477	-3.18434	0.0119322	0.146832	-2.66645
hsa_circRNA_057362	-0.800773	9.67128	-3.18398	0.0119387	0.146832	-2.66697
hsa_circRNA_070445	-0.608538	5.98273	-3.1819	0.0119774	0.146919	-2.67003
hsa_circRNA_003408	2.00138	8.16639	3.18156	0.0119839	0.146919	-2.67055
hsa_circRNA_103492	-1.20733	10.4514	-3.18115	0.0119916	0.146919	-2.67115
hsa_circRNA_101690	-0.35323	6.45635	-3.18064	0.0120011	0.146919	-2.6719
hsa_circRNA_101023	0.499521	7.96988	3.17912	0.0120294	0.146919	-2.67413
hsa_circRNA_000412	0.449128	6.71167	3.17844	0.0120422	0.146919	-2.67513
hsa_circRNA_405986	-0.714057	6.99713	-3.17518	0.0121035	0.146919	-2.67994
hsa_circRNA_011876	-0.821514	10.6947	-3.17343	0.0121367	0.146919	-2.68253
hsa_circRNA_089837	0.512016	7.38502	3.17293	0.0121461	0.146919	-2.68326
hsa_circRNA_051825	-0.93223	9.33245	-3.17209	0.0121621	0.146919	-2.6845
hsa_circRNA_020151	-0.92069	7.51331	-3.17127	0.0121775	0.146919	-2.6857
hsa_circRNA_043614	-0.852193	9.33834	-3.17127	0.0121776	0.146919	-2.68571
hsa_circRNA_077218	-0.35983	6.1758	-3.1709	0.0121847	0.146919	-2.68626
hsa_circRNA_103763	-0.551848	5.91503	-3.1708	0.0121864	0.146919	-2.6864
hsa_circRNA_404927	-0.590797	6.83637	-3.17049	0.0121923	0.146919	-2.68685
hsa_circRNA_405769	-0.962598	14.4673	-3.17006	0.0122006	0.146919	-2.68749
hsa_circRNA_405139	-0.731291	6.95092	-3.16956	0.01221	0.146919	-2.68822
hsa_circRNA_003063	-0.687427	9.65337	-3.16942	0.0122126	0.146919	-2.68843
hsa_circRNA_100079	-0.547859	7.19433	-3.16821	0.0122358	0.146919	-2.69022
hsa_circRNA_103288	-0.500025	7.36625	-3.16743	0.0122507	0.146919	-2.69137
hsa_circRNA_001401	0.476419	7.53967	3.16707	0.0122576	0.146919	-2.6919
hsa_circRNA_100597	0.537978	6.40163	3.16701	0.0122586	0.146919	-2.69198
hsa_circRNA_101550	1.19613	6.04258	3.16663	0.0122659	0.146919	-2.69254
hsa_circRNA_102381	-0.990576	10.2891	-3.16641	0.0122701	0.146919	-2.69287
hsa_circRNA_405538	1.38389	11.2543	3.16627	0.0122729	0.146919	-2.69308
hsa_circRNA_001113	0.51097	6.36799	3.16616	0.012275	0.146919	-2.69324
hsa_circRNA_013959	0.644158	8.76915	3.16614	0.0122753	0.146919	-2.69327
hsa_circRNA_102648	-0.508808	6.82051	-3.16564	0.0122848	0.146919	-2.694
hsa_circRNA_102402	0.658891	6.27216	3.16523	0.0122928	0.146919	-2.69462
hsa_circRNA_403134	-0.47976	5.45432	-3.16518	0.0122938	0.146919	-2.69469
hsa_circRNA_089921	1.35773	8.62919	3.16483	0.0123005	0.146919	-2.69521
hsa_circRNA_102288	0.523465	6.97697	3.16409	0.0123146	0.146919	-2.69629
hsa_circRNA_102547	-0.690311	7.85496	-3.16378	0.0123205	0.146919	-2.69674
hsa_circRNA_103651	-0.500972	5.20865	-3.16285	0.0123385	0.146919	-2.69812
hsa_circRNA_101963	-0.388817	6.74935	-3.16261	0.0123431	0.146919	-2.69847
hsa_circRNA_104053	-0.557437	7.42628	-3.16258	0.0123436	0.146919	-2.69852
hsa_circRNA_104582	-0.644459	8.60908	-3.16081	0.0123778	0.147052	-2.70113
hsa_circRNA_006536	0.777875	6.95213	3.16028	0.012388	0.147052	-2.70191
hsa_circRNA_404501	0.644437	10.5655	3.16019	0.0123897	0.147052	-2.70204
hsa_circRNA_101998	0.619435	7.28611	3.1588	0.0124166	0.147052	-2.70409
hsa_circRNA_100818	-0.446036	7.19462	-3.15869	0.0124189	0.147052	-2.70426
hsa_circRNA_005776	-0.577136	8.08087	-3.15771	0.0124378	0.147052	-2.70571
hsa_circRNA_402119	-0.637494	6.78085	-3.15748	0.0124423	0.147052	-2.70605
hsa_circRNA_048085	-1.42931	9.32178	-3.15743	0.0124433	0.147052	-2.70612
hsa_circRNA_101936	0.69704	6.08664	3.15674	0.0124566	0.147079	-2.70713
hsa_circRNA_071679	-0.554256	6.90409	-3.15515	0.0124876	0.14729	-2.70949
hsa_circRNA_402633	0.690704	7.00859	3.15468	0.0124967	0.14729	-2.71017
hsa_circRNA_102741	1.1163	9.15611	3.15112	0.0125664	0.147872	-2.71543
hsa_circRNA_101821	-0.469819	7.78162	-3.15102	0.0125683	0.147872	-2.71557
hsa_circRNA_102817	0.970592	9.64819	3.14976	0.012593	0.148032	-2.71743
hsa_circRNA_000780	1.18011	9.40974	3.14751	0.0126374	0.148243	-2.72076
hsa_circRNA_103735	-1.07835	7.44844	-3.14738	0.01264	0.148243	-2.72095
hsa_circRNA_102479	0.461414	6.03997	3.14715	0.0126445	0.148243	-2.72129
hsa_circRNA_403715	-0.635221	15.1857	-3.14629	0.0126614	0.148311	-2.72255
hsa_circRNA_103493	0.44702	6.47492	3.14386	0.0127095	0.148743	-2.72614
hsa_circRNA_082633	-0.870151	6.4211	-3.14216	0.0127434	0.149009	-2.72866
hsa_circRNA_104364	-0.460808	7.2879	-3.14056	0.0127751	0.149132	-2.73101
hsa_circRNA_052577	-0.412095	6.86499	-3.14038	0.0127787	0.149132	-2.73127
hsa_circRNA_001945	-0.53845	6.23245	-3.13844	0.0128177	0.149132	-2.73415
hsa_circRNA_103478	-0.69014	14.7067	-3.13802	0.0128261	0.149132	-2.73477
hsa_circRNA_407045	-0.642158	7.76736	-3.13771	0.0128322	0.149132	-2.73522
hsa_circRNA_103669	-1.11034	11.723	-3.13768	0.0128328	0.149132	-2.73526
hsa_circRNA_006779	-0.334151	5.4611	-3.13734	0.0128397	0.149132	-2.73578
hsa_circRNA_404830	-0.526106	16.1594	-3.13711	0.0128442	0.149132	-2.73611
hsa_circRNA_007390	-0.948702	8.3741	-3.13658	0.0128549	0.149132	-2.73689
hsa_circRNA_032244	-0.972073	7.54053	-3.1355	0.0128766	0.149186	-2.73849
hsa_circRNA_006682	-1.03237	6.67929	-3.13521	0.0128824	0.149186	-2.73891
hsa_circRNA_003826	0.340645	5.77703	3.13468	0.0128932	0.149186	-2.7397
hsa_circRNA_405925	0.62991	7.21503	3.13351	0.0129167	0.149328	-2.74143
hsa_circRNA_405109	-0.805302	7.58991	-3.1318	0.0129513	0.149433	-2.74395
hsa_circRNA_066649	-0.421568	5.27708	-3.13177	0.0129519	0.149433	-2.744
hsa_circRNA_405185	-0.996826	6.20391	-3.13131	0.0129611	0.149433	-2.74467
hsa_circRNA_407029	-0.721363	7.89147	-3.13062	0.0129752	0.149433	-2.7457
hsa_circRNA_100838	0.956616	9.16578	3.13006	0.0129865	0.149433	-2.74652
hsa_circRNA_407071	-0.404647	5.62974	-3.12964	0.012995	0.149433	-2.74714
hsa_circRNA_102613	-1.5496	8.09814	-3.12796	0.0130293	0.149433	-2.74963
hsa_circRNA_102557	0.504514	6.9854	3.12755	0.0130375	0.149433	-2.75023
hsa_circRNA_003940	0.593187	7.59845	3.12676	0.0130537	0.149433	-2.7514
hsa_circRNA_100251	0.824138	8.2336	3.12637	0.0130617	0.149433	-2.75198
hsa_circRNA_001772	0.396231	5.88074	3.12565	0.0130763	0.149433	-2.75304
hsa_circRNA_082854	-0.398623	6.43118	-3.12476	0.0130947	0.149433	-2.75436
hsa_circRNA_059617	-1.23354	8.33507	-3.1245	0.0130998	0.149433	-2.75474
hsa_circRNA_001518	-0.564083	6.54581	-3.12396	0.0131109	0.149433	-2.75553
hsa_circRNA_085646	-0.54734	8.24458	-3.12345	0.0131214	0.149433	-2.75629
hsa_circRNA_100503	-0.657011	7.55654	-3.12343	0.0131219	0.149433	-2.75633
hsa_circRNA_067209	0.607769	9.00535	3.12339	0.0131227	0.149433	-2.75639
hsa_circRNA_103042	-0.648823	7.03375	-3.12313	0.0131281	0.149433	-2.75677
hsa_circRNA_407344	1.4335	12.8626	3.12232	0.0131446	0.149493	-2.75796
hsa_circRNA_100761	0.380574	5.99723	3.12116	0.0131686	0.149549	-2.75968
hsa_circRNA_406660	-0.422704	6.49844	-3.12099	0.013172	0.149549	-2.75993
hsa_circRNA_104442	1.45559	6.26264	3.11968	0.0131989	0.149726	-2.76186
hsa_circRNA_007168	0.712127	6.40562	3.11905	0.013212	0.149747	-2.7628
hsa_circRNA_060308	-0.516491	7.74117	-3.11812	0.0132313	0.149838	-2.76417
hsa_circRNA_001499	0.529069	6.45087	3.11541	0.0132874	0.150232	-2.76818
hsa_circRNA_104768	-0.687032	6.22178	-3.11535	0.0132887	0.150232	-2.76827
hsa_circRNA_043650	-1.0185	14.0303	-3.1141	0.0133147	0.150323	-2.77011
hsa_circRNA_002261	-0.719995	10.2896	-3.11328	0.0133317	0.150323	-2.77133
hsa_circRNA_104735	0.517153	6.71862	3.11323	0.0133328	0.150323	-2.7714
hsa_circRNA_104748	0.891141	8.60255	3.11249	0.0133483	0.150323	-2.7725
hsa_circRNA_101362	0.461101	5.62628	3.11202	0.0133581	0.150323	-2.77319
hsa_circRNA_406621	-0.386409	5.41511	-3.11139	0.0133713	0.150323	-2.77413
hsa_circRNA_406263	-0.57434	8.2102	-3.11117	0.0133758	0.150323	-2.77445
hsa_circRNA_000625	1.13054	13.3092	3.11028	0.0133945	0.150405	-2.77576
hsa_circRNA_407018	-0.39846	5.74976	-3.10829	0.0134363	0.150616	-2.77871
hsa_circRNA_401514	-0.671443	6.61117	-3.10822	0.0134378	0.150616	-2.77882
hsa_circRNA_403404	-0.627268	7.00196	-3.10671	0.0134696	0.150616	-2.78105
hsa_circRNA_401141	0.519112	6.22655	3.1064	0.0134761	0.150616	-2.78151
hsa_circRNA_101018	1.59011	10.7025	3.10614	0.0134816	0.150616	-2.7819
hsa_circRNA_001387	0.463526	5.66815	3.1059	0.0134865	0.150616	-2.78224
hsa_circRNA_104016	0.585167	5.44741	3.10548	0.0134955	0.150616	-2.78287
hsa_circRNA_405264	0.396082	5.14782	3.1042	0.0135226	0.150616	-2.78477
hsa_circRNA_103024	0.707394	6.32271	3.10417	0.0135232	0.150616	-2.78481
hsa_circRNA_101767	-0.710801	7.57208	-3.10401	0.0135266	0.150616	-2.78504
hsa_circRNA_101878	-0.343073	6.05299	-3.10226	0.0135638	0.150807	-2.78764
hsa_circRNA_009586	0.668469	9.3881	3.10213	0.0135664	0.150807	-2.78782
hsa_circRNA_005372	-0.526658	7.81507	-3.10149	0.0135801	0.150834	-2.78878
hsa_circRNA_400206	-0.347778	5.73295	-3.09947	0.013623	0.151183	-2.79175
hsa_circRNA_103706	-0.505138	7.53774	-3.09214	0.0137804	0.152754	-2.80261
hsa_circRNA_101492	-0.58445	12.1242	-3.09172	0.0137895	0.152754	-2.80323
hsa_circRNA_100094	1.0368	6.47938	3.09032	0.0138198	0.152754	-2.80531
hsa_circRNA_060928	1.75198	7.91344	3.09016	0.0138231	0.152754	-2.80553
hsa_circRNA_406805	0.330644	5.71278	3.09014	0.0138236	0.152754	-2.80557
hsa_circRNA_103620	0.482892	5.69621	3.08965	0.0138342	0.152754	-2.80629
hsa_circRNA_104816	-0.777172	7.37714	-3.08915	0.013845	0.152754	-2.80703
hsa_circRNA_103976	-0.58411	7.60942	-3.08756	0.0138795	0.152808	-2.80939
hsa_circRNA_104679	-0.453452	7.2486	-3.08728	0.0138857	0.152808	-2.8098
hsa_circRNA_100531	-0.461875	7.37491	-3.08685	0.0138951	0.152808	-2.81044
hsa_circRNA_101604	0.374546	6.34978	3.08681	0.0138959	0.152808	-2.8105
hsa_circRNA_102950	-0.737794	8.29923	-3.08569	0.0139202	0.152862	-2.81215
hsa_circRNA_103695	0.58873	6.02656	3.08553	0.0139237	0.152862	-2.81239
hsa_circRNA_102776	1.02635	7.50234	3.08371	0.0139636	0.152865	-2.81509
hsa_circRNA_103302	-0.476823	5.75714	-3.08333	0.0139718	0.152865	-2.81565
hsa_circRNA_400616	-0.928014	9.39725	-3.08325	0.0139735	0.152865	-2.81576
hsa_circRNA_104405	1.12087	8.85092	3.08325	0.0139737	0.152865	-2.81578
hsa_circRNA_080831	-0.518544	6.93961	-3.08262	0.0139874	0.152865	-2.8167
hsa_circRNA_405960	0.450064	6.05883	3.08208	0.0139994	0.152865	-2.81751
hsa_circRNA_092108	-1.52421	8.96204	-3.08184	0.0140045	0.152865	-2.81785
hsa_circRNA_104617	-0.530376	6.38667	-3.08128	0.014017	0.152876	-2.8187
hsa_circRNA_103321	0.390976	7.46655	3.07879	0.0140716	0.153316	-2.82237
hsa_circRNA_084900	-1.68022	12.095	-3.07821	0.0140845	0.153316	-2.82324
hsa_circRNA_400418	0.609167	10.5144	3.07787	0.0140919	0.153316	-2.82373
hsa_circRNA_043368	-0.498445	8.3257	-3.07694	0.0141125	0.153337	-2.82511
hsa_circRNA_103211	-0.749502	7.70697	-3.07648	0.0141228	0.153337	-2.8258
hsa_circRNA_008981	-0.516762	6.64745	-3.07622	0.0141285	0.153337	-2.82618
hsa_circRNA_087856	0.966334	6.84873	3.07412	0.014175	0.153597	-2.82929
hsa_circRNA_006603	1.0122	8.40782	3.07405	0.0141767	0.153597	-2.82941
hsa_circRNA_102323	-0.5341	8.16291	-3.07358	0.014187	0.153597	-2.83009
hsa_circRNA_029696	0.619593	11.379	3.07303	0.0141993	0.153605	-2.83091
hsa_circRNA_405207	0.417605	6.89115	3.07198	0.0142228	0.153624	-2.83247
hsa_circRNA_104980	0.412129	5.46196	3.07191	0.0142243	0.153624	-2.83257
hsa_circRNA_005009	-0.787721	7.88077	-3.0713	0.0142379	0.153647	-2.83347
hsa_circRNA_103019	-0.575267	8.05655	-3.0699	0.0142691	0.153681	-2.83554
hsa_circRNA_103892	-0.34907	6.47754	-3.06965	0.0142749	0.153681	-2.83592
hsa_circRNA_101517	-0.802687	6.93877	-3.06901	0.0142892	0.153681	-2.83687
hsa_circRNA_103830	-0.705805	8.90986	-3.06894	0.0142907	0.153681	-2.83697
hsa_circRNA_104513	-0.490589	7.73277	-3.06858	0.0142989	0.153681	-2.83751
hsa_circRNA_087605	1.05095	7.68851	3.06742	0.0143248	0.153836	-2.83923
hsa_circRNA_028595	-0.871961	9.59927	-3.06597	0.0143576	0.154026	-2.84138
hsa_circRNA_000961	0.396101	5.33494	3.06559	0.0143659	0.154026	-2.84193
hsa_circRNA_400016	-0.888747	7.54352	-3.06499	0.0143796	0.154026	-2.84283
hsa_circRNA_405819	-0.39701	6.56561	-3.06408	0.0144002	0.154026	-2.84418
hsa_circRNA_029224	-0.465383	5.1691	-3.06351	0.0144129	0.154026	-2.84502
hsa_circRNA_100744	-1.16574	6.6766	-3.06303	0.0144238	0.154026	-2.84573
hsa_circRNA_080929	0.35955	6.38454	3.06253	0.0144352	0.154026	-2.84648
hsa_circRNA_102191	-0.690584	7.5282	-3.06253	0.0144353	0.154026	-2.84648
hsa_circRNA_003316	0.682473	5.30133	3.0606	0.0144789	0.154079	-2.84933
hsa_circRNA_006040	-0.674215	7.19047	-3.06035	0.0144846	0.154079	-2.8497
hsa_circRNA_103422	-0.63606	8.49847	-3.06031	0.0144856	0.154079	-2.84977
hsa_circRNA_405440	1.25429	8.44742	3.06004	0.0144916	0.154079	-2.85016
hsa_circRNA_000574	-0.408658	6.23712	-3.05948	0.0145044	0.154079	-2.85099
hsa_circRNA_100005	-0.358893	5.65447	-3.05925	0.0145097	0.154079	-2.85134
hsa_circRNA_059148	-0.821583	8.60986	-3.05792	0.0145399	0.154231	-2.8533
hsa_circRNA_023013	-0.376132	6.41438	-3.0576	0.0145472	0.154231	-2.85378
hsa_circRNA_102730	-0.483145	6.31374	-3.05679	0.0145659	0.154306	-2.85499
hsa_circRNA_000203	0.355504	6.37734	3.05316	0.0146491	0.154763	-2.86037
hsa_circRNA_101671	-0.487044	5.52671	-3.05273	0.014659	0.154763	-2.86101
hsa_circRNA_103127	0.450314	7.19543	3.05263	0.0146612	0.154763	-2.86115
hsa_circRNA_101501	1.32223	9.72725	3.05186	0.0146791	0.154763	-2.8623
hsa_circRNA_400527	0.937952	10.3438	3.05137	0.0146902	0.154763	-2.86302
hsa_circRNA_404917	0.65127	7.38255	3.05112	0.0146961	0.154763	-2.8634
hsa_circRNA_005086	1.83805	9.83057	3.05089	0.0147014	0.154763	-2.86374
hsa_circRNA_092483	-0.539704	7.16509	-3.05026	0.014716	0.154763	-2.86467
hsa_circRNA_407335	-0.67178	7.30423	-3.04992	0.0147238	0.154763	-2.86517
hsa_circRNA_102265	-0.855638	9.0861	-3.04935	0.0147368	0.154763	-2.86601
hsa_circRNA_406930	0.433819	7.36097	3.04874	0.0147511	0.154763	-2.86693
hsa_circRNA_104177	1.04896	6.84209	3.04857	0.0147551	0.154763	-2.86718
hsa_circRNA_077877	-0.738998	9.89888	-3.04834	0.0147604	0.154763	-2.86752
hsa_circRNA_400103	-1.07003	8.46641	-3.04701	0.0147913	0.154965	-2.8695
hsa_circRNA_404200	-0.628794	6.0065	-3.04564	0.014823	0.155174	-2.87152
hsa_circRNA_402265	0.622969	6.75905	3.04481	0.0148425	0.155256	-2.87276
hsa_circRNA_003074	1.41373	7.39912	3.0434	0.0148752	0.155466	-2.87484
hsa_circRNA_104680	-0.313541	5.92884	-3.04199	0.0149083	0.155466	-2.87694
hsa_circRNA_060102	0.794579	12.1812	3.04175	0.0149139	0.155466	-2.87729
hsa_circRNA_100121	-0.839338	5.90559	-3.04157	0.0149181	0.155466	-2.87756
hsa_circRNA_055755	-0.645819	14.4741	-3.04145	0.014921	0.155466	-2.87774
hsa_circRNA_061828	-0.57227	7.62291	-3.04009	0.0149528	0.15551	-2.87976
hsa_circRNA_102927	-1.57888	12.2911	-3.03998	0.0149555	0.15551	-2.87993
hsa_circRNA_011477	-0.842816	9.1234	-3.03819	0.0149976	0.15551	-2.88258
hsa_circRNA_407259	0.375329	5.08283	3.03781	0.0150064	0.15551	-2.88314
hsa_circRNA_062712	-0.544588	7.57533	-3.0377	0.015009	0.15551	-2.8833
hsa_circRNA_062547	-0.693798	6.53793	-3.03739	0.0150164	0.15551	-2.88376
hsa_circRNA_405716	-1.1188	12.8294	-3.0373	0.0150186	0.15551	-2.8839
hsa_circRNA_404643	1.59918	8.05206	3.03716	0.0150218	0.15551	-2.8841
hsa_circRNA_038635	0.851354	11.788	3.03664	0.0150341	0.15551	-2.88488
hsa_circRNA_104064	0.455369	6.84579	3.03599	0.0150494	0.15551	-2.88584
hsa_circRNA_103586	1.26857	8.68563	3.03536	0.0150644	0.15551	-2.88678
hsa_circRNA_068472	-0.569792	6.82023	-3.03531	0.0150656	0.15551	-2.88685
hsa_circRNA_104134	-0.632433	9.68542	-3.03163	0.015153	0.156199	-2.89232
hsa_circRNA_007443	0.738009	6.08588	3.03151	0.0151558	0.156199	-2.89249
hsa_circRNA_406640	-0.531	6.38606	-3.03087	0.0151712	0.156237	-2.89345
hsa_circRNA_075900	0.678303	11.6377	3.0299	0.0151943	0.156353	-2.89489
hsa_circRNA_004021	-0.350123	5.16569	-3.02788	0.0152426	0.15668	-2.89788
hsa_circRNA_003433	-1.02874	9.54048	-3.02759	0.0152496	0.15668	-2.89832
hsa_circRNA_101464	0.642966	7.33261	3.02593	0.0152895	0.156946	-2.90078
hsa_circRNA_405389	0.501706	7.13702	3.02552	0.0152992	0.156946	-2.90138
hsa_circRNA_060185	0.369882	6.02204	3.02442	0.0153258	0.157098	-2.90302
hsa_circRNA_404027	-0.400543	5.48073	-3.02292	0.015362	0.157202	-2.90525
hsa_circRNA_100342	-0.479942	6.65532	-3.02233	0.0153762	0.157202	-2.90612
hsa_circRNA_103025	0.320499	5.18458	3.02219	0.0153796	0.157202	-2.90633
hsa_circRNA_001378	-0.639362	7.47928	-3.02188	0.015387	0.157202	-2.90679
hsa_circRNA_100051	-0.703038	9.3825	-3.02155	0.015395	0.157202	-2.90728
hsa_circRNA_400999	-0.684091	9.90751	-3.02053	0.0154198	0.157334	-2.9088
hsa_circRNA_102257	0.529563	6.26734	3.01988	0.0154356	0.157346	-2.90976
hsa_circRNA_008786	-0.526697	6.27753	-3.01951	0.0154447	0.157346	-2.91032
hsa_circRNA_406317	-0.842219	6.6247	-3.01638	0.0155208	0.157828	-2.91496
hsa_circRNA_100465	-0.427654	5.42293	-3.01621	0.015525	0.157828	-2.91522
hsa_circRNA_400455	-1.20429	11.3398	-3.0161	0.0155276	0.157828	-2.91537
hsa_circRNA_103696	-0.67407	6.40109	-3.01421	0.0155738	0.158107	-2.91818
hsa_circRNA_103113	0.631816	6.84103	3.01401	0.0155788	0.158107	-2.91848
hsa_circRNA_050607	0.876132	11.2088	3.01305	0.0156025	0.158226	-2.91992
hsa_circRNA_400747	-0.352735	6.30531	-3.0118	0.0156332	0.158417	-2.92177
hsa_circRNA_090311	-0.548328	8.44206	-3.0075	0.0157392	0.159369	-2.92815
hsa_circRNA_100801	0.657098	6.15383	3.00554	0.015788	0.159538	-2.93107
hsa_circRNA_401976	-1.54197	14.1749	-3.00533	0.0157932	0.159538	-2.93139
hsa_circRNA_076558	-0.342129	6.71041	-3.00528	0.0157943	0.159538	-2.93145
hsa_circRNA_403890	-0.329964	5.88614	-3.0049	0.0158038	0.159538	-2.93202
hsa_circRNA_000455	0.46544	5.23214	3.00356	0.0158371	0.159751	-2.93401
hsa_circRNA_406536	-0.506906	6.78254	-3.00303	0.0158505	0.159751	-2.93481
hsa_circRNA_102183	0.603367	6.55479	3.00196	0.0158771	0.159751	-2.93639
hsa_circRNA_001201	-0.865905	7.61851	-3.00146	0.0158897	0.159751	-2.93714
hsa_circRNA_004738	-0.589008	9.85245	-3.00145	0.01589	0.159751	-2.93715
hsa_circRNA_400031	-0.978211	14.0798	-3.00117	0.015897	0.159751	-2.93757
hsa_circRNA_101904	0.651624	7.48762	2.9996	0.0159363	0.159934	-2.9399
hsa_circRNA_102253	0.741399	6.02614	2.99882	0.0159559	0.159934	-2.94106
hsa_circRNA_405810	0.392483	5.5222	2.99809	0.0159741	0.159934	-2.94214
hsa_circRNA_104322	0.460391	5.21135	2.9977	0.0159839	0.159934	-2.94272
hsa_circRNA_100806	-0.850766	9.39819	-2.99758	0.015987	0.159934	-2.9429
hsa_circRNA_000167	2.54772	8.25763	2.99756	0.0159874	0.159934	-2.94293
hsa_circRNA_000878	-0.941717	8.93399	-2.99692	0.0160036	0.159975	-2.94388
hsa_circRNA_100538	-0.495314	6.5511	-2.99609	0.0160247	0.160066	-2.94512
hsa_circRNA_072762	-0.655452	6.25773	-2.99123	0.0161478	0.161175	-2.95235
hsa_circRNA_404984	1.26944	11.8396	2.99042	0.0161684	0.161259	-2.95355
hsa_circRNA_403821	-0.865849	8.24242	-2.98943	0.0161937	0.161391	-2.95503
hsa_circRNA_033198	-0.60175	8.21331	-2.98883	0.0162088	0.161421	-2.95591
hsa_circRNA_039460	-0.592452	7.05121	-2.98756	0.0162413	0.161545	-2.95779
hsa_circRNA_103414	0.652906	8.95926	2.98739	0.0162456	0.161545	-2.95805
hsa_circRNA_031433	-0.629661	7.24769	-2.98638	0.0162716	0.161682	-2.95956
hsa_circRNA_001128	-0.359745	9.14642	-2.98542	0.0162962	0.161806	-2.96098
hsa_circRNA_081545	-0.651896	8.14443	-2.9842	0.0163276	0.161996	-2.96279
hsa_circRNA_103998	-1.3266	9.90266	-2.98312	0.0163556	0.162064	-2.96441
hsa_circRNA_050894	-0.36916	7.75435	-2.98299	0.0163588	0.162064	-2.9646
hsa_circRNA_051167	-0.615554	7.22149	-2.9821	0.0163817	0.162131	-2.96592
hsa_circRNA_028935	-0.717569	11.3583	-2.98129	0.0164026	0.162131	-2.96712
hsa_circRNA_002197	-0.680971	5.57388	-2.98097	0.016411	0.162131	-2.96761
hsa_circRNA_004649	0.655883	7.05566	2.9806	0.0164206	0.162131	-2.96816
hsa_circRNA_100655	-0.565053	9.59484	-2.98004	0.0164351	0.162131	-2.96899
hsa_circRNA_000654	0.479168	5.21034	2.97948	0.0164496	0.162131	-2.96982
hsa_circRNA_100097	1.43964	7.15603	2.97912	0.0164589	0.162131	-2.97036
hsa_circRNA_000863	-0.472455	6.67775	-2.97896	0.0164631	0.162131	-2.9706
hsa_circRNA_104165	0.848325	11.3885	2.97699	0.0165144	0.162515	-2.97353
hsa_circRNA_041623	-0.717938	8.23649	-2.97625	0.0165334	0.162583	-2.97462
hsa_circRNA_030303	-0.378071	6.10254	-2.9756	0.0165505	0.16263	-2.97559
hsa_circRNA_101348	-0.577675	6.55829	-2.97488	0.0165692	0.162693	-2.97666
hsa_circRNA_102788	0.639649	6.86387	2.97288	0.0166216	0.163003	-2.97964
hsa_circRNA_048164	0.475992	5.57385	2.97274	0.0166252	0.163003	-2.97984
hsa_circRNA_039626	1.43957	10.735	2.97032	0.0166889	0.163507	-2.98345
hsa_circRNA_404956	-0.524254	6.42619	-2.96932	0.0167152	0.163599	-2.98494
hsa_circRNA_103276	-0.733957	9.96284	-2.96842	0.0167391	0.163599	-2.98628
hsa_circRNA_078780	-0.32599	6.37196	-2.96815	0.016746	0.163599	-2.98667
hsa_circRNA_087962	1.71244	9.51584	2.9681	0.0167475	0.163599	-2.98676
hsa_circRNA_405138	0.520122	5.53602	2.96694	0.016778	0.163776	-2.98847
hsa_circRNA_006319	-0.498016	6.79123	-2.96571	0.0168106	0.163888	-2.99031
hsa_circRNA_400742	0.506008	6.83786	2.96558	0.0168141	0.163888	-2.9905
hsa_circRNA_007379	0.468291	5.51335	2.96418	0.0168512	0.163903	-2.99258
hsa_circRNA_012871	-0.961675	7.13635	-2.96403	0.0168553	0.163903	-2.99281
hsa_circRNA_103337	-0.765162	9.28296	-2.96389	0.0168589	0.163903	-2.99301
hsa_circRNA_407043	-1.01864	7.82345	-2.96341	0.0168718	0.163903	-2.99374
hsa_circRNA_100215	-0.574096	5.89403	-2.9632	0.0168773	0.163903	-2.99404
hsa_circRNA_406546	-0.45201	8.69136	-2.96226	0.0169024	0.164027	-2.99544
hsa_circRNA_104260	-0.312989	6.31414	-2.9614	0.0169254	0.164084	-2.99673
hsa_circRNA_402659	-0.401308	7.60285	-2.96112	0.0169329	0.164084	-2.99715
hsa_circRNA_087003	-0.451983	5.80487	-2.95861	0.0170001	0.164545	-3.00088
hsa_circRNA_080731	-0.864223	9.75905	-2.95842	0.0170053	0.164545	-3.00117
hsa_circRNA_104769	-0.371015	8.23505	-2.95725	0.0170366	0.164671	-3.0029
hsa_circRNA_034805	-0.850248	11.484	-2.95701	0.0170431	0.164671	-3.00326
hsa_circRNA_404530	-0.418347	6.36944	-2.95566	0.0170793	0.164901	-3.00526
hsa_circRNA_407152	-0.370986	5.45676	-2.95442	0.0171129	0.165106	-3.00712
hsa_circRNA_008851	0.768015	8.87318	2.95102	0.017205	0.165712	-3.01218
hsa_circRNA_406334	-0.789644	7.02378	-2.951	0.0172054	0.165712	-3.0122
hsa_circRNA_403568	-0.353104	6.03516	-2.95072	0.0172131	0.165712	-3.01263
hsa_circRNA_403825	-0.743926	9.93406	-2.94911	0.017257	0.166014	-3.01503
hsa_circRNA_104948	1.33574	5.97294	2.94825	0.0172805	0.16612	-3.01631
hsa_circRNA_040474	-0.53609	6.53657	-2.94634	0.0173325	0.166216	-3.01915
hsa_circRNA_400651	0.469307	7.31375	2.94611	0.0173388	0.166216	-3.01949
hsa_circRNA_006023	1.02893	6.20038	2.94572	0.0173496	0.166216	-3.02008
hsa_circRNA_102449	-1.14455	7.595	-2.94557	0.0173538	0.166216	-3.0203
hsa_circRNA_404566	0.817587	6.59013	2.94505	0.0173679	0.166216	-3.02107
hsa_circRNA_404697	-0.347904	6.63108	-2.94493	0.0173712	0.166216	-3.02125
hsa_circRNA_406895	-0.385419	6.5225	-2.94468	0.017378	0.166216	-3.02162
hsa_circRNA_101352	-0.340229	6.64013	-2.94411	0.0173936	0.166246	-3.02247
hsa_circRNA_406073	-0.973973	10.4517	-2.94233	0.0174428	0.16643	-3.02513
hsa_circRNA_102130	0.507233	7.65237	2.9416	0.0174627	0.16643	-3.0262
hsa_circRNA_001041	-0.345838	6.04176	-2.94145	0.0174671	0.16643	-3.02644
hsa_circRNA_040831	-1.32109	10.5571	-2.94138	0.0174689	0.16643	-3.02654
hsa_circRNA_101885	0.646372	5.59606	2.94097	0.0174803	0.16643	-3.02715
hsa_circRNA_404465	-0.504733	8.06978	-2.94062	0.0174898	0.16643	-3.02766
hsa_circRNA_101626	-0.483549	7.42078	-2.94008	0.0175049	0.16643	-3.02848
hsa_circRNA_405273	0.459201	6.45025	2.93978	0.017513	0.16643	-3.02892
hsa_circRNA_103818	-0.498874	7.30186	-2.93892	0.0175369	0.166485	-3.0302
hsa_circRNA_104762	0.75388	7.89698	2.93867	0.0175438	0.166485	-3.03058
hsa_circRNA_406690	-0.68166	7.52684	-2.93722	0.0175841	0.166748	-3.03274
hsa_circRNA_401668	-0.43127	6.43153	-2.93554	0.0176309	0.167073	-3.03525
hsa_circRNA_100449	-0.486638	8.68523	-2.9344	0.0176626	0.167253	-3.03694
hsa_circRNA_104466	-1.15879	7.99992	-2.93242	0.0177181	0.167604	-3.03989
hsa_circRNA_400042	-0.809422	6.7672	-2.93176	0.0177364	0.167604	-3.04087
hsa_circRNA_101105	-0.50723	6.50289	-2.93155	0.0177424	0.167604	-3.04119
hsa_circRNA_102404	-0.83842	11.7772	-2.93096	0.0177588	0.167604	-3.04206
hsa_circRNA_001426	-0.382423	6.32049	-2.93083	0.0177626	0.167604	-3.04226
hsa_circRNA_404026	-0.513101	7.08661	-2.92991	0.0177882	0.167632	-3.04362
hsa_circRNA_103360	-0.652513	5.87971	-2.92982	0.0177908	0.167632	-3.04376
hsa_circRNA_051123	-1.16329	8.356	-2.92712	0.0178671	0.168033	-3.04779
hsa_circRNA_104166	1.01997	9.72769	2.92695	0.0178716	0.168033	-3.04803
hsa_circRNA_001270	1.48066	6.81265	2.92652	0.017884	0.168033	-3.04868
hsa_circRNA_016681	0.425886	5.54616	2.92622	0.0178924	0.168033	-3.04912
hsa_circRNA_103290	0.467375	11.8257	2.92607	0.0178965	0.168033	-3.04934
hsa_circRNA_405353	-0.521199	6.00937	-2.92526	0.0179196	0.168131	-3.05056
hsa_circRNA_061570	0.408198	5.89168	2.92324	0.0179769	0.16855	-3.05357
hsa_circRNA_402321	-0.47271	5.64316	-2.92208	0.01801	0.16874	-3.0553
hsa_circRNA_101292	0.626708	6.27235	2.92053	0.018054	0.169034	-3.0576
hsa_circRNA_047733	-0.478665	9.43394	-2.91976	0.0180761	0.169061	-3.05875
hsa_circRNA_084106	0.926474	6.05155	2.91954	0.0180824	0.169061	-3.05908
hsa_circRNA_407056	-0.405023	6.52568	-2.9179	0.0181294	0.169299	-3.06153
hsa_circRNA_004119	0.694911	6.6766	2.91777	0.0181332	0.169299	-3.06173
hsa_circRNA_405448	0.622187	8.74737	2.91589	0.0181871	0.16962	-3.06453
hsa_circRNA_100345	-0.353653	5.73925	-2.91543	0.0182004	0.16962	-3.06521
hsa_circRNA_104531	0.48333	5.76834	2.91424	0.0182346	0.16962	-3.06699
hsa_circRNA_001126	1.15948	11.615	2.91393	0.0182434	0.16962	-3.06744
hsa_circRNA_036286	-0.654695	7.82968	-2.91382	0.0182467	0.16962	-3.06761
hsa_circRNA_006482	-0.330302	5.71657	-2.91335	0.0182602	0.16962	-3.06831
hsa_circRNA_101995	0.486124	7.54099	2.9132	0.0182646	0.16962	-3.06853
hsa_circRNA_073629	0.334525	6.62175	2.91204	0.018298	0.16962	-3.07026
hsa_circRNA_005897	0.472058	6.8325	2.91178	0.0183056	0.16962	-3.07065
hsa_circRNA_101298	-0.307447	5.96764	-2.91155	0.0183122	0.16962	-3.07099
hsa_circRNA_101940	0.874134	5.46562	2.91133	0.0183189	0.16962	-3.07133
hsa_circRNA_102052	0.791092	5.82925	2.91126	0.0183207	0.16962	-3.07143
hsa_circRNA_103507	0.847515	12.2443	2.90986	0.0183613	0.169877	-3.07351
hsa_circRNA_104346	1.4041	6.6592	2.90887	0.0183902	0.170026	-3.07499
hsa_circRNA_086359	-0.318301	5.93297	-2.90829	0.018407	0.170064	-3.07586
hsa_circRNA_038054	-0.839414	11.546	-2.90705	0.0184432	0.170143	-3.07771
hsa_circRNA_104497	-0.741315	7.72593	-2.90668	0.0184541	0.170143	-3.07826
hsa_circRNA_103724	-0.659771	7.15865	-2.90668	0.0184541	0.170143	-3.07826
hsa_circRNA_402608	0.418895	6.27109	2.90611	0.0184706	0.170177	-3.0791
hsa_circRNA_100228	-0.624132	7.99857	-2.90379	0.0185387	0.170299	-3.08257
hsa_circRNA_069235	-0.506811	6.7055	-2.90374	0.01854	0.170299	-3.08264
hsa_circRNA_103161	-0.736806	6.83564	-2.90347	0.018548	0.170299	-3.08304
hsa_circRNA_071347	-0.3756	6.95126	-2.9034	0.0185499	0.170299	-3.08314
hsa_circRNA_102360	0.395018	6.95441	2.90337	0.018551	0.170299	-3.0832
hsa_circRNA_029301	1.46073	6.64515	2.90304	0.0185606	0.170299	-3.08369
hsa_circRNA_102652	-0.623176	8.16785	-2.90094	0.0186224	0.170748	-3.08682
hsa_circRNA_100551	0.783878	9.09687	2.89898	0.0186803	0.171078	-3.08974
hsa_circRNA_100466	-0.709253	8.02021	-2.89869	0.0186889	0.171078	-3.09018
hsa_circRNA_101125	-0.45374	6.30555	-2.89841	0.018697	0.171078	-3.09059
hsa_circRNA_401539	0.594621	6.74146	2.89654	0.0187526	0.171447	-3.09338
hsa_circRNA_051805	-0.404916	6.38926	-2.89593	0.0187705	0.171447	-3.09428
hsa_circRNA_000776	-0.72598	7.36925	-2.89575	0.018776	0.171447	-3.09456
hsa_circRNA_058188	-0.551815	9.53943	-2.8953	0.0187894	0.171451	-3.09523
hsa_circRNA_103570	0.927872	5.68037	2.89473	0.0188064	0.171489	-3.09608
hsa_circRNA_100029	-0.557018	6.05295	-2.89405	0.0188266	0.171518	-3.0971
hsa_circRNA_404126	-0.394731	6.84099	-2.89376	0.0188354	0.171518	-3.09753
hsa_circRNA_404663	-0.742565	6.31253	-2.89297	0.0188588	0.171614	-3.09871
hsa_circRNA_102218	1.36331	8.6296	2.89193	0.01889	0.171702	-3.10026
hsa_circRNA_006688	0.368328	5.4138	2.89139	0.0189061	0.171702	-3.10107
hsa_circRNA_104939	-1.35415	9.70799	-2.89135	0.0189072	0.171702	-3.10112
hsa_circRNA_405468	0.798494	6.3355	2.89064	0.0189286	0.171779	-3.10219
hsa_circRNA_406863	0.462698	6.07824	2.88938	0.0189664	0.171888	-3.10406
hsa_circRNA_103165	-0.552047	6.73116	-2.88896	0.0189788	0.171888	-3.10468
hsa_circRNA_404268	-0.760839	7.19392	-2.8884	0.0189957	0.171888	-3.10552
hsa_circRNA_102606	-0.618962	6.65668	-2.88813	0.0190038	0.171888	-3.10592
hsa_circRNA_084725	-0.723635	11.6828	-2.88808	0.0190053	0.171888	-3.106
hsa_circRNA_101210	-0.351712	6.80885	-2.8873	0.019029	0.171926	-3.10717
hsa_circRNA_101720	-0.540295	7.55449	-2.88692	0.0190404	0.171926	-3.10773
hsa_circRNA_004390	-0.653801	8.37384	-2.88666	0.0190483	0.171926	-3.10812
hsa_circRNA_103526	0.690948	7.29467	2.88336	0.019148	0.172575	-3.11304
hsa_circRNA_064985	-0.555915	6.75935	-2.88234	0.0191791	0.172575	-3.11457
hsa_circRNA_022623	-0.630384	7.40193	-2.88226	0.0191813	0.172575	-3.11468
hsa_circRNA_101798	-0.708464	10.38	-2.88222	0.0191826	0.172575	-3.11474
hsa_circRNA_406000	-0.3773	6.33678	-2.88214	0.0191851	0.172575	-3.11487
hsa_circRNA_000846	-0.354748	5.46026	-2.88065	0.0192304	0.172767	-3.11709
hsa_circRNA_102056	0.811975	8.32674	2.88058	0.0192324	0.172767	-3.11719
hsa_circRNA_092420	-0.711743	8.46501	-2.87974	0.0192582	0.172798	-3.11845
hsa_circRNA_006314	1.87672	9.06221	2.87962	0.0192619	0.172798	-3.11863
hsa_circRNA_029930	1.45131	10.6018	2.87884	0.0192855	0.172893	-3.11978
hsa_circRNA_402911	-0.528462	6.93557	-2.87791	0.0193139	0.173031	-3.12117
hsa_circRNA_102401	0.42349	5.31778	2.87711	0.0193384	0.173134	-3.12236
hsa_circRNA_104284	-0.431765	6.17849	-2.87537	0.0193919	0.173496	-3.12496
hsa_circRNA_000129	-0.913943	12.0836	-2.87432	0.0194243	0.173669	-3.12653
hsa_circRNA_102897	0.392566	6.37637	2.87385	0.0194386	0.17368	-3.12723
hsa_circRNA_040773	-0.820193	12.7948	-2.87305	0.0194633	0.17368	-3.12843
hsa_circRNA_100934	1.02575	9.90668	2.873	0.0194647	0.17368	-3.1285
hsa_circRNA_402019	0.477402	11.8506	2.87155	0.0195096	0.173783	-3.13066
hsa_circRNA_100540	-0.615036	6.05993	-2.87143	0.0195133	0.173783	-3.13084
hsa_circRNA_104925	-0.994483	7.41369	-2.87116	0.0195218	0.173783	-3.13125
hsa_circRNA_407076	-0.598448	6.4094	-2.87094	0.0195286	0.173783	-3.13158
hsa_circRNA_404642	1.03678	6.61743	2.87016	0.0195528	0.173883	-3.13275
hsa_circRNA_016121	0.981748	7.32543	2.86928	0.0195799	0.173884	-3.13405
hsa_circRNA_001621	-0.375165	5.4877	-2.86901	0.0195885	0.173884	-3.13446
hsa_circRNA_407079	0.962849	7.65661	2.86889	0.0195922	0.173884	-3.13464
hsa_circRNA_101366	0.603281	8.42767	2.86769	0.0196294	0.173981	-3.13643
hsa_circRNA_008816	-0.420636	7.08361	-2.86732	0.0196409	0.173981	-3.13698
hsa_circRNA_008177	-0.384151	5.51047	-2.867	0.0196508	0.173981	-3.13745
hsa_circRNA_100512	0.512137	6.98655	2.86675	0.0196586	0.173981	-3.13783
hsa_circRNA_031460	-0.49717	7.37421	-2.86643	0.0196685	0.173981	-3.1383
hsa_circRNA_103921	-0.65728	6.5875	-2.86545	0.0196993	0.173984	-3.13977
hsa_circRNA_402722	-0.326818	5.63732	-2.86532	0.0197033	0.173984	-3.13997
hsa_circRNA_002427	-0.693504	6.55652	-2.86447	0.0197297	0.173984	-3.14123
hsa_circRNA_104170	0.633966	7.05397	2.86409	0.0197419	0.173984	-3.14181
hsa_circRNA_018657	-0.601586	7.39594	-2.86401	0.0197442	0.173984	-3.14192
hsa_circRNA_074537	-1.07802	14.2843	-2.86339	0.0197635	0.173984	-3.14284
hsa_circRNA_101744	1.21125	12.2814	2.86312	0.0197722	0.173984	-3.14325
hsa_circRNA_006464	-0.810626	7.75454	-2.86278	0.0197829	0.173984	-3.14376
hsa_circRNA_404229	0.442288	6.13703	2.86266	0.0197867	0.173984	-3.14394
hsa_circRNA_026378	-0.34427	5.48	-2.86026	0.0198619	0.17453	-3.14752
hsa_circRNA_001877	1.66255	9.91278	2.85895	0.0199032	0.174696	-3.14947
hsa_circRNA_030039	-0.327757	7.22898	-2.85843	0.0199198	0.174696	-3.15026
hsa_circRNA_401555	1.93271	8.40123	2.85828	0.0199244	0.174696	-3.15048
hsa_circRNA_405558	-0.79501	13.0374	-2.858	0.0199334	0.174696	-3.1509
hsa_circRNA_001765	-0.911416	6.89748	-2.85616	0.0199914	0.174905	-3.15364
hsa_circRNA_028628	0.321299	6.76917	2.85612	0.0199927	0.174905	-3.1537
hsa_circRNA_102245	-0.682212	6.87743	-2.856	0.0199966	0.174905	-3.15388
hsa_circRNA_104714	-0.809563	8.72712	-2.85523	0.0200211	0.175004	-3.15503
hsa_circRNA_405391	-1.27941	11.2115	-2.85478	0.0200352	0.175012	-3.1557
hsa_circRNA_101852	0.592869	6.54005	2.8517	0.0201333	0.175753	-3.16029
hsa_circRNA_404532	-0.305605	5.36687	-2.8501	0.0201845	0.176085	-3.16268
hsa_circRNA_027286	0.64885	5.93714	2.84928	0.0202108	0.176199	-3.16391
hsa_circRNA_102394	0.84242	5.76342	2.84764	0.0202636	0.176443	-3.16637
hsa_circRNA_053028	-0.809097	8.23313	-2.84725	0.0202762	0.176443	-3.16695
hsa_circRNA_101146	1.16801	6.89538	2.84641	0.020303	0.176443	-3.1682
hsa_circRNA_405366	1.25551	7.7485	2.84635	0.020305	0.176443	-3.16829
hsa_circRNA_100035	0.743595	9.49867	2.84634	0.0203052	0.176443	-3.1683
hsa_circRNA_069015	-0.412469	7.04972	-2.84541	0.0203354	0.17659	-3.1697
hsa_circRNA_103780	-0.397087	6.72662	-2.84479	0.0203555	0.176649	-3.17062
hsa_circRNA_086368	-0.439918	8.31629	-2.84321	0.0204065	0.176952	-3.17298
hsa_circRNA_003300	0.801282	9.63499	2.84225	0.0204376	0.176952	-3.17441
hsa_circRNA_101194	-0.404102	6.95697	-2.84221	0.020439	0.176952	-3.17448
hsa_circRNA_032135	-0.37597	5.09449	-2.84206	0.0204436	0.176952	-3.17469
hsa_circRNA_405012	0.460188	6.48611	2.84088	0.0204822	0.177171	-3.17647
hsa_circRNA_011032	-0.959722	10.493	-2.8397	0.0205204	0.177326	-3.17822
hsa_circRNA_101701	0.468824	5.28916	2.83941	0.02053	0.177326	-3.17866
hsa_circRNA_100136	-0.681672	7.33041	-2.8391	0.0205402	0.177326	-3.17912
hsa_circRNA_104953	0.641788	7.9506	2.83822	0.0205688	0.17738	-3.18043
hsa_circRNA_101391	-0.399606	6.00074	-2.83809	0.0205731	0.17738	-3.18063
hsa_circRNA_105007	0.3815	5.69376	2.83612	0.0206373	0.177818	-3.18357
hsa_circRNA_100508	-0.545529	9.63899	-2.83518	0.0206682	0.177968	-3.18497
hsa_circRNA_001506	-1.71654	12.2293	-2.83413	0.0207026	0.178046	-3.18654
hsa_circRNA_407279	-1.1137	13.4276	-2.83358	0.0207207	0.178046	-3.18736
hsa_circRNA_403531	-0.333927	6.27527	-2.83312	0.0207359	0.178046	-3.18805
hsa_circRNA_079973	-0.799756	10.5147	-2.83307	0.0207376	0.178046	-3.18813
hsa_circRNA_402743	-1.28999	8.62137	-2.83287	0.0207441	0.178046	-3.18842
hsa_circRNA_400043	-0.405692	15.9941	-2.83186	0.0207774	0.178217	-3.18993
hsa_circRNA_102661	0.794962	8.77079	2.8313	0.0207957	0.178259	-3.19076
hsa_circRNA_086475	-0.759576	10.8022	-2.83084	0.0208111	0.178276	-3.19146
hsa_circRNA_054496	-0.32766	5.97664	-2.82958	0.0208528	0.178518	-3.19334
hsa_circRNA_021467	0.582627	8.52337	2.82749	0.020922	0.178788	-3.19646
hsa_circRNA_405846	-0.681701	6.75949	-2.82726	0.0209297	0.178788	-3.1968
hsa_circRNA_100642	0.388274	5.59839	2.82687	0.0209425	0.178788	-3.19738
hsa_circRNA_407003	0.680528	6.61195	2.82676	0.0209462	0.178788	-3.19755
hsa_circRNA_045183	0.315964	6.12851	2.8266	0.0209517	0.178788	-3.19779
hsa_circRNA_013637	-0.643711	5.99918	-2.82573	0.0209805	0.17892	-3.19908
hsa_circRNA_405019	0.36788	6.11198	2.825	0.0210048	0.179012	-3.20017
hsa_circRNA_104631	-0.632901	5.59065	-2.82408	0.0210356	0.17916	-3.20155
hsa_circRNA_017873	-0.718851	6.71763	-2.82342	0.0210578	0.179234	-3.20254
hsa_circRNA_006969	-0.631879	7.25939	-2.82025	0.0211639	0.179763	-3.20727
hsa_circRNA_002583	0.357986	5.65637	2.81956	0.0211872	0.179763	-3.20831
hsa_circRNA_100641	-0.372224	7.44867	-2.81949	0.0211897	0.179763	-3.20842
hsa_circRNA_001650	-0.452156	7.31101	-2.81928	0.0211968	0.179763	-3.20873
hsa_circRNA_059354	-0.597077	5.80485	-2.81925	0.0211976	0.179763	-3.20877
hsa_circRNA_004566	-0.364538	7.38996	-2.81915	0.0212011	0.179763	-3.20892
hsa_circRNA_102092	0.650199	6.10132	2.81843	0.0212251	0.179769	-3.20999
hsa_circRNA_038282	-0.383615	6.3329	-2.81811	0.0212361	0.179769	-3.21047
hsa_circRNA_104256	-0.891268	9.22	-2.81714	0.021269	0.179769	-3.21193
hsa_circRNA_028202	0.354292	5.49341	2.81673	0.0212826	0.179769	-3.21253
hsa_circRNA_101795	-0.600565	10.0254	-2.81621	0.0213003	0.179769	-3.21331
hsa_circRNA_075648	0.693208	7.35966	2.81614	0.0213026	0.179769	-3.21342
hsa_circRNA_103541	-0.338204	7.35818	-2.81614	0.0213027	0.179769	-3.21342
hsa_circRNA_102406	-0.595801	7.82197	-2.81592	0.0213099	0.179769	-3.21374
hsa_circRNA_101356	1.24493	6.02117	2.81492	0.021344	0.179918	-3.21524
hsa_circRNA_406584	-1.38913	8.0621	-2.81433	0.0213639	0.179918	-3.21612
hsa_circRNA_001442	0.817813	7.95784	2.81339	0.021396	0.179918	-3.21753
hsa_circRNA_002677	-0.57153	6.79976	-2.81334	0.0213974	0.179918	-3.21759
hsa_circRNA_074595	1.23548	7.08834	2.81324	0.0214009	0.179918	-3.21774
hsa_circRNA_101755	0.38398	5.99394	2.81264	0.0214216	0.179918	-3.21865
hsa_circRNA_403068	0.401959	7.43633	2.81261	0.0214223	0.179918	-3.21869
hsa_circRNA_000300	-0.53448	9.95979	-2.81127	0.021468	0.180188	-3.22069
hsa_circRNA_103571	0.42407	8.15712	2.809	0.0215456	0.18056	-3.22408
hsa_circRNA_100680	-0.439787	7.26253	-2.80888	0.0215499	0.18056	-3.22427
hsa_circRNA_003988	-0.332716	5.56138	-2.80789	0.0215836	0.18056	-3.22574
hsa_circRNA_103785	-0.469808	6.91472	-2.80785	0.0215852	0.18056	-3.22581
hsa_circRNA_102238	0.737979	5.58848	2.80768	0.0215909	0.18056	-3.22606
hsa_circRNA_100546	0.754282	7.30718	2.80714	0.0216094	0.18056	-3.22686
hsa_circRNA_407025	-0.450881	6.2371	-2.80654	0.0216302	0.18056	-3.22777
hsa_circRNA_405741	0.561131	10.1272	2.80606	0.0216467	0.18056	-3.22848
hsa_circRNA_100341	-0.365704	7.02498	-2.80583	0.0216545	0.18056	-3.22882
hsa_circRNA_062980	0.689098	11.1759	2.80575	0.0216571	0.18056	-3.22894
hsa_circRNA_405536	0.831488	7.84936	2.80562	0.0216618	0.18056	-3.22914
hsa_circRNA_104383	-0.668493	6.79402	-2.80499	0.0216834	0.180597	-3.23008
hsa_circRNA_103928	-0.483961	6.46782	-2.80423	0.0217094	0.180597	-3.23121
hsa_circRNA_400056	-0.396345	6.62117	-2.80417	0.0217116	0.180597	-3.2313
hsa_circRNA_404432	0.823309	14.8435	2.80348	0.0217355	0.180597	-3.23234
hsa_circRNA_100867	-0.937642	8.85671	-2.80312	0.021748	0.180597	-3.23288
hsa_circRNA_103636	0.530396	7.41014	2.80295	0.0217538	0.180597	-3.23313
hsa_circRNA_100794	0.597221	8.00247	2.80193	0.0217893	0.180597	-3.23466
hsa_circRNA_100256	0.60022	6.93212	2.80133	0.02181	0.180597	-3.23555
hsa_circRNA_001299	0.565331	6.33556	2.80129	0.0218113	0.180597	-3.23561
hsa_circRNA_004669	-0.398215	7.05796	-2.80128	0.0218118	0.180597	-3.23563
hsa_circRNA_003712	0.957196	7.88909	2.80062	0.0218346	0.180597	-3.23661
hsa_circRNA_102074	-0.45998	6.5184	-2.80044	0.0218406	0.180597	-3.23687
hsa_circRNA_045309	-0.508874	8.57848	-2.79928	0.021881	0.180597	-3.23861
hsa_circRNA_405107	-1.07048	7.67239	-2.79759	0.0219399	0.180597	-3.24114
hsa_circRNA_062551	-0.453748	7.11932	-2.79749	0.0219436	0.180597	-3.24129
hsa_circRNA_101053	1.0419	6.51311	2.79727	0.0219512	0.180597	-3.24162
hsa_circRNA_002562	-0.37437	5.47272	-2.79681	0.0219673	0.180597	-3.24231
hsa_circRNA_000202	-0.739868	9.32225	-2.79676	0.0219688	0.180597	-3.24238
hsa_circRNA_102842	0.469788	6.06733	2.79644	0.02198	0.180597	-3.24285
hsa_circRNA_406247	0.561237	6.46883	2.79635	0.0219831	0.180597	-3.24299
hsa_circRNA_002055	-0.428373	6.50831	-2.796	0.0219955	0.180597	-3.24352
hsa_circRNA_013177	-0.764679	11.5923	-2.79562	0.0220086	0.180597	-3.24408
hsa_circRNA_104797	0.700546	8.7635	2.79526	0.0220215	0.180597	-3.24463
hsa_circRNA_030254	0.639791	7.77568	2.79472	0.0220403	0.180597	-3.24543
hsa_circRNA_104773	0.722552	7.80587	2.79433	0.0220538	0.180597	-3.24601
hsa_circRNA_101376	0.28642	6.12892	2.79364	0.0220783	0.180597	-3.24705
hsa_circRNA_103907	-0.35599	5.80018	-2.79349	0.0220835	0.180597	-3.24727
hsa_circRNA_104451	0.52147	7.56137	2.79337	0.0220876	0.180597	-3.24744
hsa_circRNA_077101	1.27362	8.47575	2.79323	0.0220925	0.180597	-3.24765
hsa_circRNA_022776	-0.551462	6.77763	-2.7932	0.0220937	0.180597	-3.24771
hsa_circRNA_061185	-0.384128	6.69639	-2.79297	0.0221018	0.180597	-3.24805
hsa_circRNA_104285	-0.540745	8.01065	-2.79282	0.0221069	0.180597	-3.24826
hsa_circRNA_055012	-0.745191	8.2787	-2.7926	0.0221145	0.180597	-3.24859
hsa_circRNA_405507	0.785112	5.84903	2.79165	0.0221482	0.180712	-3.25002
hsa_circRNA_406299	-0.524368	7.16785	-2.79143	0.0221557	0.180712	-3.25034
hsa_circRNA_402327	0.452541	5.90389	2.78994	0.0222085	0.181023	-3.25258
hsa_circRNA_102914	-0.810323	9.74808	-2.7887	0.0222522	0.181023	-3.25442
hsa_circRNA_104123	-0.603198	6.71156	-2.7887	0.0222523	0.181023	-3.25443
hsa_circRNA_102493	0.354036	5.79061	2.7886	0.0222557	0.181023	-3.25457
hsa_circRNA_100940	0.346304	7.61723	2.7882	0.0222699	0.181023	-3.25517
hsa_circRNA_003065	0.695485	7.60605	2.78804	0.0222756	0.181023	-3.25541
hsa_circRNA_102132	0.389156	6.50231	2.78676	0.0223211	0.181282	-3.25733
hsa_circRNA_100607	-0.444478	6.04997	-2.78553	0.0223646	0.181519	-3.25916
hsa_circRNA_000770	0.425498	6.62888	2.78517	0.0223776	0.181519	-3.2597
hsa_circRNA_102011	-0.634489	11.1404	-2.78384	0.0224249	0.181792	-3.26169
hsa_circRNA_404522	-0.48393	8.21325	-2.78312	0.0224506	0.18189	-3.26277
hsa_circRNA_054663	-0.696181	7.05835	-2.78178	0.0224985	0.182166	-3.26477
hsa_circRNA_104492	0.58146	5.39437	2.78065	0.0225391	0.182364	-3.26646
hsa_circRNA_405766	-0.324968	5.55598	-2.7802	0.022555	0.182364	-3.26712
hsa_circRNA_000482	1.29345	6.75946	2.77992	0.0225651	0.182364	-3.26755
hsa_circRNA_104645	1.41018	7.28758	2.77946	0.0225818	0.182364	-3.26824
hsa_circRNA_103374	-0.377794	5.25951	-2.77919	0.0225914	0.182364	-3.26864
hsa_circRNA_087986	-0.576734	6.43502	-2.77875	0.0226073	0.182372	-3.2693
hsa_circRNA_059104	-0.574734	9.57809	-2.7784	0.0226199	0.182372	-3.26982
hsa_circRNA_079201	-1.03281	11.946	-2.77755	0.0226505	0.182508	-3.2711
hsa_circRNA_080302	-0.99139	8.5357	-2.77657	0.0226859	0.182584	-3.27256
hsa_circRNA_028072	1.75737	8.17037	2.77652	0.0226874	0.182584	-3.27263
hsa_circRNA_000887	-0.582924	8.72355	-2.77612	0.0227019	0.18259	-3.27323
hsa_circRNA_404788	-0.410383	7.42303	-2.77484	0.0227481	0.182787	-3.27514
hsa_circRNA_008122	0.352757	6.95225	2.77468	0.0227539	0.182787	-3.27538
hsa_circRNA_103721	-0.292359	6.096	-2.77369	0.02279	0.182967	-3.27686
hsa_circRNA_006020	-0.357992	5.53315	-2.77213	0.0228467	0.183154	-3.2792
hsa_circRNA_101316	0.840659	6.875	2.77193	0.0228538	0.183154	-3.27949
hsa_circRNA_404908	-0.579419	7.20958	-2.77191	0.0228547	0.183154	-3.27953
hsa_circRNA_007819	-0.376311	6.83944	-2.77086	0.0228927	0.183281	-3.28109
hsa_circRNA_033196	-0.337295	5.39422	-2.77069	0.0228989	0.183281	-3.28134
hsa_circRNA_103434	0.355454	5.13073	2.77034	0.0229119	0.183281	-3.28188
hsa_circRNA_402543	-0.470697	6.43717	-2.76914	0.0229554	0.183353	-3.28366
hsa_circRNA_101378	-0.467455	10.2284	-2.76898	0.0229614	0.183353	-3.28391
hsa_circRNA_001570	-0.391887	7.19162	-2.76896	0.0229623	0.183353	-3.28394
hsa_circRNA_100254	0.336939	5.9404	2.76746	0.0230172	0.183682	-3.28618
hsa_circRNA_100140	-0.687009	7.74269	-2.76543	0.0230913	0.184163	-3.28921
hsa_circRNA_073593	0.502295	6.15734	2.76385	0.0231495	0.184377	-3.29157
hsa_circRNA_103774	-0.651778	6.99154	-2.76372	0.0231545	0.184377	-3.29177
hsa_circRNA_062539	0.534809	7.68803	2.76357	0.0231598	0.184377	-3.29199
hsa_circRNA_401170	-0.734005	11.8748	-2.763	0.023181	0.184436	-3.29285
hsa_circRNA_102974	0.477913	5.97608	2.7624	0.0232032	0.184496	-3.29374
hsa_circRNA_405418	-0.331412	5.51403	-2.76067	0.0232672	0.184496	-3.29633
hsa_circRNA_405646	0.478979	5.51158	2.7605	0.0232734	0.184496	-3.29658
hsa_circRNA_400057	-0.447557	9.51812	-2.76048	0.0232743	0.184496	-3.29662
hsa_circRNA_035208	-0.595314	7.98331	-2.76031	0.0232805	0.184496	-3.29687
hsa_circRNA_005328	0.61733	5.9011	2.7602	0.0232846	0.184496	-3.29703
hsa_circRNA_104059	0.339479	5.58663	2.76017	0.0232858	0.184496	-3.29708
hsa_circRNA_102340	0.465385	6.25638	2.75945	0.0233122	0.184595	-3.29815
hsa_circRNA_407021	-0.339024	7.01261	-2.75875	0.0233383	0.184692	-3.2992
hsa_circRNA_101470	-1.10066	10.0635	-2.75813	0.0233613	0.18471	-3.30012
hsa_circRNA_401887	-0.689342	8.78187	-2.75794	0.0233683	0.18471	-3.30041
hsa_circRNA_405289	-0.878778	8.07181	-2.75709	0.0234002	0.184745	-3.30169
hsa_circRNA_092467	0.429966	7.97766	2.75708	0.0234005	0.184745	-3.3017
hsa_circRNA_104376	0.508194	8.03331	2.75592	0.0234439	0.184977	-3.30344
hsa_circRNA_000598	0.401516	15.7239	2.75519	0.0234712	0.185042	-3.30453
hsa_circRNA_101879	1.19121	11.0243	2.75441	0.0235003	0.185042	-3.30569
hsa_circRNA_100111	0.945788	10.4288	2.75337	0.0235392	0.185042	-3.30725
hsa_circRNA_064743	0.629114	5.6493	2.7531	0.0235494	0.185042	-3.30766
hsa_circRNA_103851	-0.339477	5.98279	-2.7529	0.0235568	0.185042	-3.30795
hsa_circRNA_102717	-0.325785	5.50416	-2.7529	0.0235568	0.185042	-3.30795
hsa_circRNA_405708	0.831481	8.49922	2.75278	0.0235612	0.185042	-3.30812
hsa_circRNA_000114	-0.660738	5.83106	-2.75265	0.0235661	0.185042	-3.30832
hsa_circRNA_015382	-0.641354	10.651	-2.75184	0.0235964	0.185042	-3.30953
hsa_circRNA_008989	0.714561	8.64326	2.75169	0.0236022	0.185042	-3.30976
hsa_circRNA_001372	-0.317692	6.19514	-2.75161	0.0236052	0.185042	-3.30988
hsa_circRNA_103382	0.62785	5.85089	2.75043	0.0236496	0.185281	-3.31164
hsa_circRNA_103015	-0.341213	5.76697	-2.7493	0.0236921	0.185504	-3.31333
hsa_circRNA_002447	0.796011	6.82573	2.74741	0.0237637	0.185766	-3.31616
hsa_circRNA_403515	0.74063	8.61223	2.74724	0.0237701	0.185766	-3.31641
hsa_circRNA_102862	-0.372139	6.64138	-2.74694	0.0237813	0.185766	-3.31686
hsa_circRNA_102733	0.328146	5.68297	2.74668	0.0237914	0.185766	-3.31725
hsa_circRNA_104619	-1.10103	9.65763	-2.74618	0.0238103	0.185766	-3.318
hsa_circRNA_025501	-0.768952	13.2203	-2.74584	0.0238233	0.185766	-3.31851
hsa_circRNA_101141	-1.11662	12.3892	-2.74494	0.0238572	0.185766	-3.31985
hsa_circRNA_103143	0.617068	7.99425	2.74487	0.0238599	0.185766	-3.31995
hsa_circRNA_080790	-0.544107	7.13427	-2.74483	0.0238613	0.185766	-3.32001
hsa_circRNA_018315	0.471112	6.45517	2.74444	0.0238763	0.185766	-3.3206
hsa_circRNA_059359	-0.983279	12.2287	-2.74392	0.0238962	0.185766	-3.32138
hsa_circRNA_102539	0.562941	5.76002	2.74368	0.0239052	0.185766	-3.32174
hsa_circRNA_100292	-0.45395	7.70361	-2.74363	0.0239071	0.185766	-3.32181
hsa_circRNA_404891	-0.488598	10.4449	-2.7426	0.0239465	0.185963	-3.32335
hsa_circRNA_102650	-0.448443	5.99597	-2.74164	0.0239829	0.186124	-3.32478
hsa_circRNA_007922	-0.422881	5.10698	-2.74132	0.0239952	0.186124	-3.32526
hsa_circRNA_104798	0.809691	8.74314	2.73888	0.0240886	0.186739	-3.32891
hsa_circRNA_053651	0.354082	6.58821	2.73833	0.0241099	0.186796	-3.32974
hsa_circRNA_407132	-0.397983	5.90115	-2.73544	0.0242209	0.187234	-3.33405
hsa_circRNA_010844	-0.690988	7.92566	-2.73542	0.024222	0.187234	-3.33409
hsa_circRNA_101952	-0.657403	8.08276	-2.73539	0.0242228	0.187234	-3.33412
hsa_circRNA_102639	-0.351708	10.9873	-2.73496	0.0242394	0.187234	-3.33477
hsa_circRNA_100192	0.855577	12.9714	2.73463	0.0242525	0.187234	-3.33527
hsa_circRNA_104873	-0.721698	9.36167	-2.73438	0.024262	0.187234	-3.33564
hsa_circRNA_103135	0.534492	7.5476	2.7343	0.0242651	0.187234	-3.33576
hsa_circRNA_404938	-0.612473	9.55617	-2.73271	0.0243268	0.187527	-3.33814
hsa_circRNA_000106	0.536991	7.04114	2.73259	0.0243312	0.187527	-3.33832
hsa_circRNA_001858	-0.57508	6.18857	-2.73145	0.0243753	0.187758	-3.34002
hsa_circRNA_101059	0.315475	6.0982	2.72992	0.0244349	0.18808	-3.34231
hsa_circRNA_002292	0.912019	7.75385	2.72965	0.0244454	0.18808	-3.34271
hsa_circRNA_000078	0.871133	7.47512	2.72865	0.0244846	0.188272	-3.34421
hsa_circRNA_405076	-0.722134	14.0706	-2.7276	0.0245253	0.188477	-3.34577
hsa_circRNA_101937	-0.455268	8.02261	-2.7266	0.0245647	0.18867	-3.34728
hsa_circRNA_406603	0.428596	5.81913	2.72623	0.0245793	0.188673	-3.34784
hsa_circRNA_406261	-0.511321	7.23708	-2.72468	0.0246399	0.189029	-3.35015
hsa_circRNA_102618	-0.647261	7.55917	-2.72339	0.0246908	0.189297	-3.35208
hsa_circRNA_078715	1.01386	9.12688	2.72176	0.0247547	0.189297	-3.35451
hsa_circRNA_002850	0.493521	5.86059	2.72171	0.0247567	0.189297	-3.35458
hsa_circRNA_104664	0.570516	7.59492	2.72161	0.0247608	0.189297	-3.35474
hsa_circRNA_104781	1.57006	7.09845	2.72144	0.0247674	0.189297	-3.35499
hsa_circRNA_101157	0.43407	6.38371	2.72136	0.0247707	0.189297	-3.35511
hsa_circRNA_001058	-0.288458	6.17188	-2.72126	0.0247745	0.189297	-3.35526
hsa_circRNA_102951	0.418098	8.98909	2.72039	0.0248091	0.189453	-3.35657
hsa_circRNA_103232	-0.466066	8.30214	-2.72002	0.0248238	0.189456	-3.35712
hsa_circRNA_000095	-0.350917	5.22811	-2.71876	0.0248737	0.189728	-3.359
hsa_circRNA_001871	-1.02013	12.2668	-2.71815	0.0248978	0.189745	-3.35991
hsa_circRNA_018343	-0.336448	5.31943	-2.71798	0.0249045	0.189745	-3.36017
hsa_circRNA_003326	0.577844	9.3124	2.71761	0.0249191	0.189747	-3.36072
hsa_circRNA_401518	0.428834	6.02478	2.71555	0.0250013	0.190265	-3.36381
hsa_circRNA_407319	-0.679857	10.2283	-2.71496	0.0250245	0.190333	-3.36468
hsa_circRNA_069059	-0.538821	7.73207	-2.71444	0.0250455	0.190378	-3.36546
hsa_circRNA_400095	-0.758796	7.68177	-2.71402	0.0250623	0.190378	-3.36609
hsa_circRNA_406594	-0.45395	5.72839	-2.71374	0.0250735	0.190378	-3.36651
hsa_circRNA_403111	-0.65085	5.56851	-2.71338	0.0250878	0.190378	-3.36705
hsa_circRNA_103556	0.759047	6.80767	2.71199	0.0251434	0.190532	-3.36912
hsa_circRNA_010096	-0.719958	15.3448	-2.71178	0.0251519	0.190532	-3.36944
hsa_circRNA_064277	-0.796352	8.01706	-2.71161	0.0251585	0.190532	-3.36969
hsa_circRNA_104833	-1.43808	11.4615	-2.71123	0.0251741	0.190532	-3.37027
hsa_circRNA_102219	-0.901711	11.265	-2.71109	0.0251797	0.190532	-3.37048
hsa_circRNA_102201	-0.419126	6.7159	-2.70975	0.0252334	0.190814	-3.37247
hsa_circRNA_008397	-0.440335	6.75909	-2.70924	0.0252539	0.190814	-3.37323
hsa_circRNA_043423	-0.611992	6.86871	-2.70839	0.0252884	0.190814	-3.37451
hsa_circRNA_017449	0.926248	10.5204	2.70796	0.0253054	0.190814	-3.37514
hsa_circRNA_104856	0.3293	8.15908	2.70771	0.0253155	0.190814	-3.37552
hsa_circRNA_406066	0.522149	5.95912	2.7076	0.0253202	0.190814	-3.37569
hsa_circRNA_100963	-0.640896	6.27516	-2.70737	0.0253292	0.190814	-3.37603
hsa_circRNA_406704	0.263259	5.37067	2.70731	0.0253318	0.190814	-3.37612
hsa_circRNA_102152	0.507697	5.44302	2.70565	0.0253991	0.19117	-3.37861
hsa_circRNA_003621	-0.546687	7.30305	-2.70543	0.0254078	0.19117	-3.37893
hsa_circRNA_089739	-0.772984	8.58728	-2.70435	0.0254515	0.19139	-3.38054
hsa_circRNA_402521	-0.483291	6.18688	-2.70337	0.0254913	0.191564	-3.38201
hsa_circRNA_102466	-0.69284	9.64765	-2.70266	0.0255205	0.191564	-3.38308
hsa_circRNA_104823	0.731029	6.73667	2.70239	0.0255314	0.191564	-3.38348
hsa_circRNA_405077	-0.468448	6.44741	-2.70237	0.0255322	0.191564	-3.38351
hsa_circRNA_007328	0.28495	5.23822	2.70196	0.025549	0.191582	-3.38413
hsa_circRNA_104495	0.626859	9.03486	2.70101	0.0255877	0.191764	-3.38555
hsa_circRNA_103386	-0.454598	6.88842	-2.70063	0.0256032	0.191772	-3.38612
hsa_circRNA_104365	-0.383835	5.75046	-2.69904	0.0256682	0.19207	-3.38849
hsa_circRNA_405660	-0.40097	5.64926	-2.69895	0.0256719	0.19207	-3.38863
hsa_circRNA_000585	1.8165	11.4822	2.69816	0.0257042	0.192133	-3.38981
hsa_circRNA_063739	-0.719768	9.10714	-2.69804	0.0257092	0.192133	-3.38999
hsa_circRNA_102475	-0.498203	7.95702	-2.69688	0.0257569	0.192381	-3.39173
hsa_circRNA_044375	-0.966808	6.45993	-2.69613	0.0257874	0.1925	-3.39284
hsa_circRNA_006050	-0.847728	6.81911	-2.69512	0.025829	0.192703	-3.39435
hsa_circRNA_008518	0.371074	6.15278	2.69446	0.0258563	0.192798	-3.39534
hsa_circRNA_103475	0.502951	5.994	2.69372	0.0258869	0.192801	-3.39645
hsa_circRNA_100863	0.871401	6.13502	2.69345	0.025898	0.192801	-3.39685
hsa_circRNA_102826	0.919264	8.0466	2.6934	0.0259001	0.192801	-3.39693
hsa_circRNA_101572	0.81625	6.39739	2.69245	0.0259393	0.19287	-3.39834
hsa_circRNA_089978	-0.550251	6.4075	-2.69242	0.0259408	0.19287	-3.3984
hsa_circRNA_064552	0.380335	8.68013	2.69179	0.0259667	0.19287	-3.39933
hsa_circRNA_068478	-0.663407	10.6301	-2.69177	0.0259674	0.19287	-3.39936
hsa_circRNA_103299	-0.494001	7.32984	-2.69096	0.026001	0.192886	-3.40057
hsa_circRNA_403553	-0.366315	7.1874	-2.69067	0.0260133	0.192886	-3.40101
hsa_circRNA_001481	0.389734	5.9718	2.69035	0.0260266	0.192886	-3.40149
hsa_circRNA_030069	-0.890656	6.91843	-2.69032	0.0260276	0.192886	-3.40153
hsa_circRNA_405762	-0.599271	7.62008	-2.68932	0.0260691	0.19296	-3.40302
hsa_circRNA_104632	-0.425707	6.77933	-2.68913	0.0260773	0.19296	-3.40332
hsa_circRNA_005931	0.648987	5.58178	2.6889	0.0260867	0.19296	-3.40365
hsa_circRNA_008883	0.710322	5.8241	2.68869	0.0260956	0.19296	-3.40397
hsa_circRNA_400718	-0.372835	5.54945	-2.68715	0.0261596	0.193325	-3.40627
hsa_circRNA_103677	0.533658	6.83601	2.68636	0.0261928	0.19336	-3.40746
hsa_circRNA_104120	0.61067	6.03292	2.68601	0.0262073	0.19336	-3.40797
hsa_circRNA_101546	-0.406773	6.39888	-2.68599	0.026208	0.19336	-3.408
hsa_circRNA_028345	-0.402697	5.41297	-2.68507	0.0262465	0.19348	-3.40938
hsa_circRNA_405416	-0.338312	6.42579	-2.68491	0.0262533	0.19348	-3.40962
hsa_circRNA_100670	-0.568226	7.4055	-2.68441	0.0262743	0.193527	-3.41037
hsa_circRNA_101673	-0.499313	6.52033	-2.6836	0.0263081	0.193669	-3.41157
hsa_circRNA_008410	2.24511	8.80543	2.6832	0.026325	0.193686	-3.41218
hsa_circRNA_040787	-0.372406	6.98112	-2.68245	0.0263566	0.193808	-3.4133
hsa_circRNA_102577	0.596393	5.86643	2.68211	0.0263708	0.193808	-3.4138
hsa_circRNA_104896	-0.42097	7.21088	-2.6816	0.0263924	0.193823	-3.41457
hsa_circRNA_100614	-0.425757	6.90656	-2.68137	0.0264019	0.193823	-3.41491
hsa_circRNA_102535	0.70553	5.28402	2.6808	0.0264263	0.193895	-3.41577
hsa_circRNA_072587	-0.516099	6.85723	-2.67987	0.0264651	0.194073	-3.41715
hsa_circRNA_104374	-0.75308	9.15773	-2.67911	0.0264974	0.194202	-3.41829
hsa_circRNA_082672	0.424478	5.90596	2.67876	0.0265124	0.194205	-3.41882
hsa_circRNA_024081	-0.508736	10.0306	-2.67808	0.0265412	0.194205	-3.41984
hsa_circRNA_101637	0.466105	11.8555	2.67807	0.0265415	0.194205	-3.41985
hsa_circRNA_037096	-0.488508	8.78869	-2.67768	0.0265582	0.19422	-3.42044
hsa_circRNA_104085	-0.408261	6.75672	-2.67687	0.0265926	0.194276	-3.42165
hsa_circRNA_404923	-0.434099	7.49523	-2.67681	0.0265951	0.194276	-3.42174
hsa_circRNA_001281	0.890075	7.06768	2.67612	0.0266241	0.194381	-3.42276
hsa_circRNA_004706	0.438063	7.15582	2.67574	0.0266404	0.194393	-3.42333
hsa_circRNA_406465	-0.896831	7.64924	-2.67515	0.0266657	0.194471	-3.42422
hsa_circRNA_027819	-0.55874	7.64951	-2.67441	0.0266971	0.194593	-3.42533
hsa_circRNA_405553	-0.296606	5.21209	-2.67375	0.0267253	0.194692	-3.42631
hsa_circRNA_101742	0.296387	8.58031	2.6719	0.0268041	0.194968	-3.42907
hsa_circRNA_104976	-0.42948	6.5087	-2.67182	0.0268076	0.194968	-3.4292
hsa_circRNA_100571	0.920623	9.83233	2.67174	0.0268111	0.194968	-3.42932
hsa_circRNA_405910	-0.356784	5.72306	-2.67149	0.0268219	0.194968	-3.42969
hsa_circRNA_103336	0.813938	7.48381	2.67062	0.0268591	0.194997	-3.431
hsa_circRNA_104771	-1.32504	10.4545	-2.67038	0.0268694	0.194997	-3.43135
hsa_circRNA_405909	0.880946	10.38	2.67006	0.0268829	0.194997	-3.43182
hsa_circRNA_101080	0.375694	5.85433	2.66986	0.0268917	0.194997	-3.43213
hsa_circRNA_000447	-0.814821	6.22153	-2.66965	0.0269005	0.194997	-3.43244
hsa_circRNA_043523	0.318784	5.48253	2.66913	0.0269228	0.194997	-3.43321
hsa_circRNA_404843	0.410926	7.56506	2.669	0.0269285	0.194997	-3.43341
hsa_circRNA_102040	0.377202	5.85827	2.66808	0.0269683	0.195074	-3.43479
hsa_circRNA_092180	-0.53734	6.95196	-2.66801	0.0269709	0.195074	-3.43489
hsa_circRNA_105040	1.72357	8.54489	2.66773	0.0269832	0.195074	-3.43531
hsa_circRNA_000433	-0.505348	7.26328	-2.66702	0.0270138	0.195189	-3.43637
hsa_circRNA_406530	0.319949	6.16055	2.66563	0.0270738	0.195517	-3.43845
hsa_circRNA_103654	0.483184	6.35599	2.66522	0.0270917	0.19554	-3.43907
hsa_circRNA_045989	0.788658	7.07433	2.66434	0.0271297	0.195708	-3.44038
hsa_circRNA_001302	-1.09572	10.2962	-2.66395	0.0271465	0.195723	-3.44096
hsa_circRNA_004878	0.482552	9.08891	2.66352	0.0271651	0.195751	-3.4416
hsa_circRNA_027046	-0.453196	10.2134	-2.66285	0.0271941	0.195853	-3.4426
hsa_circRNA_406723	0.650116	6.14548	2.66242	0.027213	0.195884	-3.44326
hsa_circRNA_404246	-0.568005	8.18987	-2.66187	0.027237	0.19595	-3.44408
hsa_circRNA_000811	-0.369078	5.15085	-2.66138	0.0272582	0.195997	-3.44481
hsa_circRNA_101320	0.337029	6.34134	2.65996	0.02732	0.196335	-3.44693
hsa_circRNA_404701	0.662188	7.35078	2.65951	0.0273397	0.19637	-3.4476
hsa_circRNA_103330	0.747192	8.89961	2.65886	0.027368	0.196467	-3.44857
hsa_circRNA_020235	-0.47376	9.08732	-2.65753	0.0274263	0.196759	-3.45056
hsa_circRNA_081379	0.946415	6.87184	2.65684	0.0274565	0.196759	-3.4516
hsa_circRNA_100848	0.354885	8.26812	2.65682	0.0274575	0.196759	-3.45163
hsa_circRNA_405435	0.391834	6.41581	2.65658	0.0274678	0.196759	-3.45198
hsa_circRNA_101237	0.422456	6.4516	2.65586	0.0274995	0.196846	-3.45306
hsa_circRNA_404784	-0.795255	7.10113	-2.65509	0.0275332	0.196846	-3.45421
hsa_circRNA_400045	0.400686	13.9324	2.655	0.0275372	0.196846	-3.45434
hsa_circRNA_404646	0.948873	8.86973	2.65496	0.0275392	0.196846	-3.45441
hsa_circRNA_102653	0.649948	6.84407	2.65271	0.0276383	0.197243	-3.45777
hsa_circRNA_402575	-0.376345	6.19995	-2.65254	0.0276456	0.197243	-3.45802
hsa_circRNA_101520	0.31302	5.85789	2.65248	0.0276484	0.197243	-3.45812
hsa_circRNA_405083	-0.836901	7.65453	-2.65213	0.0276636	0.197243	-3.45863
hsa_circRNA_001312	0.444364	5.58665	2.65201	0.0276689	0.197243	-3.45881
hsa_circRNA_104427	-0.476796	6.73269	-2.65058	0.0277325	0.197525	-3.46096
hsa_circRNA_104341	-0.813075	10.7236	-2.64982	0.0277661	0.197525	-3.46209
hsa_circRNA_000539	-0.515876	6.51094	-2.64968	0.0277721	0.197525	-3.4623
hsa_circRNA_103142	0.409677	5.25304	2.64956	0.0277778	0.197525	-3.46249
hsa_circRNA_018380	-0.317444	7.84748	-2.64944	0.0277827	0.197525	-3.46265
hsa_circRNA_059565	-0.862499	9.20021	-2.64897	0.0278037	0.197568	-3.46336
hsa_circRNA_100415	0.381583	6.35836	2.64806	0.027844	0.197574	-3.46471
hsa_circRNA_065656	-0.493246	7.30438	-2.64804	0.0278453	0.197574	-3.46476
hsa_circRNA_020256	-0.458469	7.9182	-2.64782	0.0278548	0.197574	-3.46508
hsa_circRNA_102614	-0.800809	9.11588	-2.64762	0.0278639	0.197574	-3.46538
hsa_circRNA_103532	0.317111	9.06132	2.64725	0.0278801	0.197583	-3.46593
hsa_circRNA_001027	1.62907	8.7112	2.64629	0.0279232	0.197783	-3.46737
hsa_circRNA_406027	-0.375178	6.53801	-2.64544	0.0279609	0.197944	-3.46863
hsa_circRNA_405658	-0.788908	7.09533	-2.64492	0.0279844	0.198006	-3.46942
hsa_circRNA_100604	1.19616	12.2911	2.64386	0.0280319	0.198236	-3.47101
hsa_circRNA_005768	1.30842	7.0638	2.64227	0.0281029	0.19855	-3.47338
hsa_circRNA_101337	1.04622	10.8703	2.64188	0.0281204	0.19855	-3.47396
hsa_circRNA_032233	-0.995899	9.1762	-2.64187	0.0281211	0.19855	-3.47398
hsa_circRNA_070520	-0.615247	7.76452	-2.64096	0.0281617	0.198731	-3.47533
hsa_circRNA_100960	-0.549327	10.6575	-2.64011	0.0282002	0.198897	-3.47661
hsa_circRNA_030355	0.450247	6.89107	2.63848	0.0282737	0.199219	-3.47904
hsa_circRNA_092468	-0.63219	8.27828	-2.63843	0.0282758	0.199219	-3.47911
hsa_circRNA_009544	-0.566108	7.75034	-2.63757	0.0283149	0.199225	-3.48041
hsa_circRNA_102241	0.763425	10.9468	2.63741	0.028322	0.199225	-3.48064
hsa_circRNA_000782	0.537471	5.40335	2.63732	0.0283259	0.199225	-3.48077
hsa_circRNA_100413	0.83101	7.77476	2.63709	0.0283366	0.199225	-3.48112
hsa_circRNA_081001	0.378885	8.6262	2.63539	0.0284136	0.199567	-3.48366
hsa_circRNA_062990	-0.506093	7.66	-2.63535	0.0284153	0.199567	-3.48372
hsa_circRNA_103461	2.0761	8.92646	2.63407	0.0284736	0.199615	-3.48564
hsa_circRNA_036766	0.441431	5.86658	2.63397	0.0284781	0.199615	-3.48579
hsa_circRNA_104760	1.00008	11.7564	2.63342	0.0285031	0.199615	-3.48661
hsa_circRNA_101132	-0.61543	6.98562	-2.63319	0.0285138	0.199615	-3.48696
hsa_circRNA_101903	1.00544	7.19007	2.63318	0.028514	0.199615	-3.48696
hsa_circRNA_400780	1.09664	7.29319	2.63312	0.0285167	0.199615	-3.48705
hsa_circRNA_102283	-0.426859	7.06632	-2.63253	0.0285437	0.199615	-3.48794
hsa_circRNA_085144	0.537694	5.62564	2.63226	0.0285558	0.199615	-3.48834
hsa_circRNA_003251	0.976791	8.43795	2.63223	0.0285572	0.199615	-3.48838
hsa_circRNA_031831	-0.405879	6.98738	-2.63125	0.028602	0.199802	-3.48985
hsa_circRNA_014306	-0.461294	11.4766	-2.6307	0.0286271	0.199802	-3.49067
hsa_circRNA_102038	-0.587381	7.06341	-2.62929	0.0286918	0.199802	-3.49278
hsa_circRNA_013054	-0.420535	6.12519	-2.62928	0.0286923	0.199802	-3.4928
hsa_circRNA_091692	1.09852	11.0984	2.62896	0.0287071	0.199802	-3.49328
hsa_circRNA_103237	1.55037	9.62818	2.62858	0.0287244	0.199802	-3.49384
hsa_circRNA_101367	-0.765819	8.20557	-2.62795	0.0287532	0.199802	-3.49478
hsa_circRNA_011228	-0.335915	6.38012	-2.62755	0.0287718	0.199802	-3.49538
hsa_circRNA_081069	0.331263	8.30346	2.62725	0.0287857	0.199802	-3.49583
hsa_circRNA_101616	-0.320404	6.43114	-2.62711	0.0287921	0.199802	-3.49604
hsa_circRNA_401635	0.402453	10.948	2.62706	0.0287941	0.199802	-3.49611
hsa_circRNA_405032	-0.972402	11.5405	-2.6269	0.0288017	0.199802	-3.49636
hsa_circRNA_103516	0.822067	7.08763	2.62689	0.028802	0.199802	-3.49636
hsa_circRNA_101756	1.28652	10.9429	2.62684	0.0288043	0.199802	-3.49644
hsa_circRNA_101195	0.318812	5.66147	2.62673	0.0288094	0.199802	-3.4966
hsa_circRNA_100177	0.921103	9.9965	2.62624	0.0288321	0.199855	-3.49734
hsa_circRNA_101328	-0.282158	17.0174	-2.62515	0.0288824	0.2001	-3.49897
hsa_circRNA_101954	-0.420841	5.7088	-2.62425	0.0289237	0.200177	-3.50031
hsa_circRNA_074450	0.635812	5.78256	2.62411	0.0289306	0.200177	-3.50053
hsa_circRNA_039107	0.32779	5.96952	2.62393	0.0289388	0.200177	-3.50079
hsa_circRNA_032482	-0.549253	6.22732	-2.6234	0.0289632	0.200242	-3.50158
hsa_circRNA_101922	-0.657301	8.28814	-2.62208	0.0290244	0.200547	-3.50356
hsa_circRNA_092446	1.07197	10.5887	2.6218	0.0290374	0.200547	-3.50398
hsa_circRNA_404641	0.459739	6.97606	2.62087	0.0290804	0.200734	-3.50536
hsa_circRNA_008564	-0.524805	7.6757	-2.62056	0.0290948	0.200734	-3.50582
hsa_circRNA_102476	0.495514	6.04053	2.61902	0.0291665	0.201067	-3.50813
hsa_circRNA_100712	0.301659	6.19137	2.61863	0.0291849	0.201067	-3.50871
hsa_circRNA_011588	-0.347925	10.9883	-2.61849	0.0291915	0.201067	-3.50893
hsa_circRNA_103733	0.355664	6.48219	2.61823	0.0292035	0.201067	-3.50931
hsa_circRNA_082501	0.446604	5.2618	2.61706	0.0292582	0.201339	-3.51106
hsa_circRNA_001745	0.968651	9.20878	2.61618	0.0292992	0.201495	-3.51237
hsa_circRNA_103657	0.369776	6.69627	2.61593	0.0293111	0.201495	-3.51275
hsa_circRNA_103861	0.356595	6.09531	2.61518	0.0293461	0.201631	-3.51386
hsa_circRNA_104944	-0.38608	7.62919	-2.61455	0.0293759	0.201732	-3.51481
hsa_circRNA_002682	0.256849	5.80016	2.61384	0.0294092	0.201773	-3.51587
hsa_circRNA_056370	-0.345672	6.1128	-2.61378	0.0294122	0.201773	-3.51597
hsa_circRNA_086441	-0.696559	8.47032	-2.61327	0.0294362	0.201833	-3.51673
hsa_circRNA_104232	-0.902824	9.86339	-2.61208	0.0294923	0.202113	-3.51851
hsa_circRNA_104977	0.365789	6.81142	2.61081	0.029552	0.202418	-3.5204
hsa_circRNA_400007	-0.389184	6.98619	-2.61022	0.0295798	0.202504	-3.52128
hsa_circRNA_102328	0.33107	5.97004	2.60898	0.0296385	0.202645	-3.52313
hsa_circRNA_400354	-0.408169	6.08917	-2.60887	0.0296438	0.202645	-3.5233
hsa_circRNA_100330	0.286718	5.77478	2.6086	0.0296566	0.202645	-3.5237
hsa_circRNA_003982	-0.538268	8.03993	-2.6085	0.0296613	0.202645	-3.52385
hsa_circRNA_102605	-0.7253	10.2685	-2.60685	0.0297396	0.202749	-3.52631
hsa_circRNA_102768	-0.344746	6.35609	-2.60673	0.0297455	0.202749	-3.5265
hsa_circRNA_101364	-0.685297	7.15983	-2.60637	0.0297627	0.202749	-3.52704
hsa_circRNA_048963	0.406249	5.16039	2.60621	0.0297703	0.202749	-3.52728
hsa_circRNA_402360	-0.611967	6.66228	-2.60587	0.0297865	0.202749	-3.52779
hsa_circRNA_002871	0.442528	4.98652	2.60559	0.0297997	0.202749	-3.5282
hsa_circRNA_078543	-0.451468	6.32487	-2.60523	0.0298167	0.202749	-3.52874
hsa_circRNA_405561	-0.703262	9.84743	-2.60519	0.0298188	0.202749	-3.5288
hsa_circRNA_000888	-0.566978	7.44123	-2.60511	0.0298223	0.202749	-3.52891
hsa_circRNA_405449	1.15892	8.14428	2.6047	0.0298421	0.202749	-3.52953
hsa_circRNA_100568	0.440866	7.04737	2.60384	0.0298829	0.202749	-3.53081
hsa_circRNA_067058	-0.318708	6.15218	-2.60355	0.0298968	0.202749	-3.53124
hsa_circRNA_007046	0.303633	10.6997	2.6033	0.0299091	0.202749	-3.53163
hsa_circRNA_103284	0.930504	8.00863	2.60304	0.0299213	0.202749	-3.53201
hsa_circRNA_000522	-0.317253	5.81324	-2.603	0.0299232	0.202749	-3.53207
hsa_circRNA_402962	-0.324162	6.85098	-2.60296	0.0299254	0.202749	-3.53214
hsa_circRNA_100837	0.743101	6.41016	2.60216	0.0299635	0.202749	-3.53333
hsa_circRNA_400427	-0.532408	7.06171	-2.6021	0.0299666	0.202749	-3.53342
hsa_circRNA_003416	0.914156	13.0454	2.60166	0.0299875	0.202749	-3.53407
hsa_circRNA_406553	-0.455616	5.83651	-2.60113	0.0300129	0.202749	-3.53486
hsa_circRNA_085959	0.518519	8.09168	2.60002	0.030066	0.202749	-3.53652
hsa_circRNA_104590	-0.602665	6.86157	-2.59983	0.0300755	0.202749	-3.53681
hsa_circRNA_039459	-0.518352	5.89498	-2.59969	0.0300819	0.202749	-3.53701
hsa_circRNA_406431	-0.744139	6.16495	-2.59951	0.030091	0.202749	-3.53729
hsa_circRNA_100057	-0.581679	6.42188	-2.59927	0.0301025	0.202749	-3.53765
hsa_circRNA_006515	0.404218	5.40716	2.59901	0.0301149	0.202749	-3.53804
hsa_circRNA_104934	0.842042	6.85325	2.59878	0.030126	0.202749	-3.53838
hsa_circRNA_102964	-0.370564	6.06352	-2.59877	0.0301262	0.202749	-3.53839
hsa_circRNA_000422	0.372891	6.35447	2.59843	0.0301425	0.202749	-3.53889
hsa_circRNA_400085	-0.479107	6.38221	-2.59836	0.0301462	0.202749	-3.53901
hsa_circRNA_000832	-0.686211	6.7446	-2.59829	0.0301494	0.202749	-3.5391
hsa_circRNA_102070	0.913605	7.48377	2.597	0.0302117	0.202885	-3.54103
hsa_circRNA_066113	1.37133	10.0316	2.59694	0.0302145	0.202885	-3.54112
hsa_circRNA_004602	-0.409042	7.07971	-2.59693	0.0302152	0.202885	-3.54114
hsa_circRNA_032895	-0.357197	7.22508	-2.5966	0.0302311	0.202889	-3.54163
hsa_circRNA_104450	0.583288	6.95192	2.59603	0.0302588	0.202957	-3.54249
hsa_circRNA_040698	0.418013	7.59292	2.59576	0.0302719	0.202957	-3.54289
hsa_circRNA_014085	-0.291866	7.29382	-2.59481	0.0303176	0.202982	-3.5443
hsa_circRNA_406652	-0.813991	13.2577	-2.59478	0.030319	0.202982	-3.54435
hsa_circRNA_100259	1.31143	6.56584	2.59473	0.0303214	0.202982	-3.54442
hsa_circRNA_104271	0.78674	7.12824	2.59371	0.030371	0.203212	-3.54595
hsa_circRNA_404607	0.59006	6.65851	2.59156	0.0304757	0.203772	-3.54916
hsa_circRNA_100343	-0.311678	5.64099	-2.59095	0.0305054	0.203772	-3.55007
hsa_circRNA_005152	-0.776737	6.18652	-2.59059	0.030523	0.203772	-3.55061
hsa_circRNA_104540	-0.500671	8.92636	-2.59043	0.0305311	0.203772	-3.55086
hsa_circRNA_103757	1.30934	7.2667	2.59042	0.0305313	0.203772	-3.55086
hsa_circRNA_406324	-0.391771	6.35737	-2.58921	0.0305903	0.203985	-3.55267
hsa_circRNA_001750	0.357801	6.81601	2.58903	0.0305994	0.203985	-3.55294
hsa_circRNA_103079	0.578835	7.3437	2.58858	0.0306215	0.203985	-3.55362
hsa_circRNA_405826	0.290675	6.4181	2.58851	0.0306246	0.203985	-3.55371
hsa_circRNA_002876	0.896291	8.34265	2.58782	0.0306588	0.20411	-3.55475
hsa_circRNA_102698	0.370712	5.58411	2.58694	0.0307017	0.204203	-3.55606
hsa_circRNA_403658	2.02711	9.38657	2.58691	0.0307034	0.204203	-3.55611
[truncated: 11,296 more rows]

## Sheet: Annotation
ID	circRNA symbol
logFC	Log2-fold change between two experimental conditions
AveExpr	Average expression of gene symbol
t	Moderated t-statistic
P.Value	Raw P-value
adj.P.Val	P-value after adjustment for multiple testing
B	B-statistic or log-odds that the gene is differentially expressed
